# Supplementary material for: The hierarchy of ab initio and DFT methods for describing an intramolecular non-covalent Si⋯N contact in the silicon compounds using electron diffraction geometries
Source: Royal Society of Chemistry journal article supplement (doi:10.1039/d0cp05872f), 2021-01-01
Supplement: d0cp05872f1.pdf [file d0cp05872f1.pdf]

Electronic supplementary information

**The hierarchy of *ab initio* and DFT methods for describing  
an intramolecular non-covalent Si...N contact in the silicon compounds  
using electron diffraction geometries**

**Elena F. Belogolova,<sup>a</sup> Sergey A. Shlykov,<sup>\*b</sup> Alexey V. Eroshin,<sup>b</sup> Evgeniya P. Doronina<sup>a</sup> and  
Valery F. Sidorkin<sup>\*a</sup>**

<sup>a</sup> A. E. Favorsky Irkutsk Institute of Chemistry, Siberian Branch of the Russian Academy of Sciences,  
1 Favorsky Street, 664033 Irkutsk, Russian Federation  
E-mail: [svf@irioch.irk.ru](mailto:svf@irioch.irk.ru)

<sup>b</sup> Ivanovo State University of Chemistry and Technology,  
Sheremetievskiy ave. 7, 153000 Ivanovo, Russian Federation  
E-mail: [shlykov@isuct.ru](mailto:shlykov@isuct.ru)

**Equation S1.** Agreement factor being minimized at least-squares procedure of the GED data:

$$R_f = 100 \left[ \frac{\sum_i^n \omega_i [s_i M_{\text{exp.}}(s_i) - k s_i M_{\text{theor.}}(s_i)]^2}{\sum_i^n \omega_i [s_i M_{\text{exp.}}(s_i)]^2} \right]^{1/2}$$

where:  $\omega_i$  – weight function;  $k$ – scale coefficient (index of resolution),  $k = s_i M_{\text{exp.}}(s_i) / s_i M_{\text{theor.}}(s_i)$ ,  $s_i M_{\text{exp.}}(s_i)$ ,  $s_i M_{\text{theor.}}(s_i)$  – experimental and theoretical molecular scattering intensities, respectively.

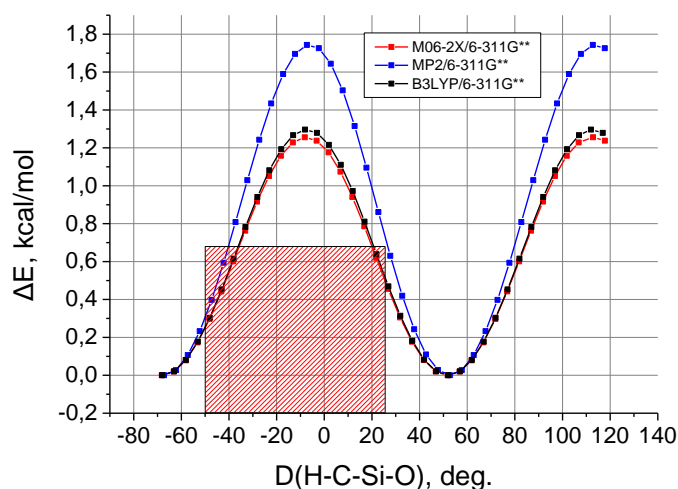

**Figure S1.** PES of methyl group rotation along with GED data, see also main text. The filled rectangle corresponds to the GED value of the angle with error limit.

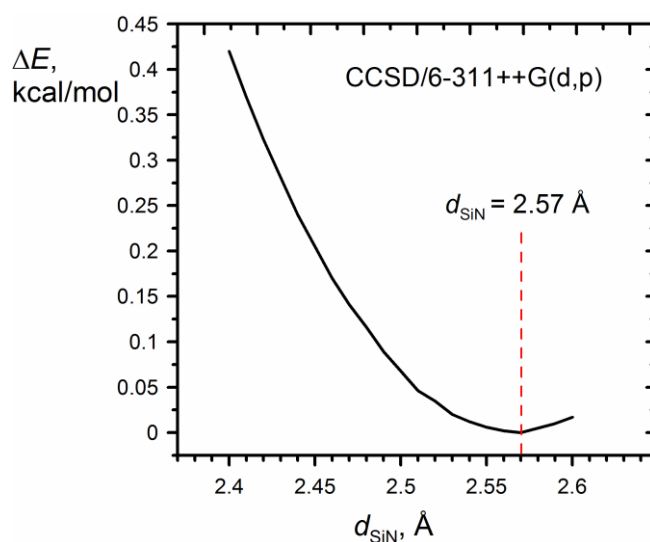

**Figure S2.** The relative energy of 1-methylsilatrane computed at the CCSD/6-311++G(d,p) level as function of the Si...N distance (the value of the total energy in minimum was set to zero). The PES scan with respect to  $d_{\text{SiN}}$  was performed with increment of 0.01 Å and using the full MP2/6-311++G(d,p) optimization of the remaining geometric parameters.

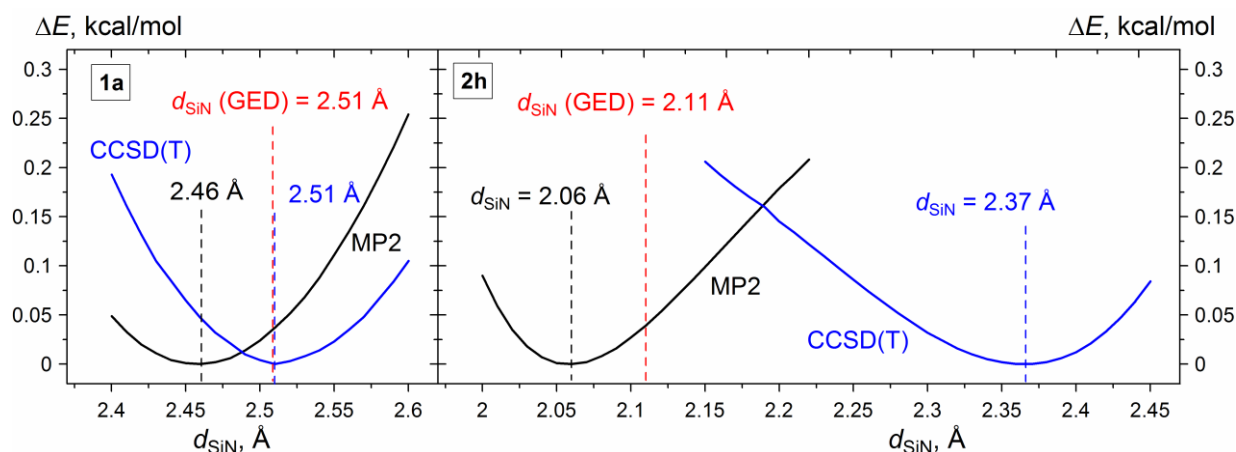

**Figure S3.** MP2/6-311++G(d,p) and CCSD(T)/6-311++G(d,p) potential functions of deformation of the Si...N contact in molecules **1a** and **2h** (the value of the total energy in minimum was set to zero). The PES scan with respect to  $d_{\text{SiN}}$  was performed with increment of 0.01 Å and using the full MP2/6-311++G(d,p) optimization of the remaining geometric parameters.

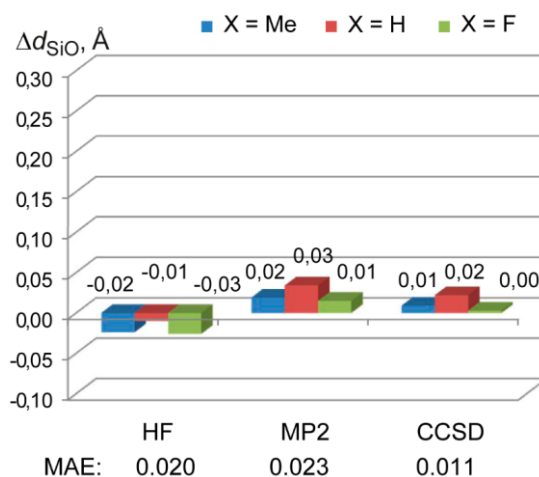

**Figure S4.** Difference between the ab initio calculated (with the 6-311G(d,p) basis set) and GED experimental values of the Si-O bond lengths ( $\Delta d_{\text{SiO}}$ , Å), as well as the corresponding MAE values (in Å) in molecules  $\text{XSi}(\text{OCH}_2\text{CH}_2)_3\text{N}$ .

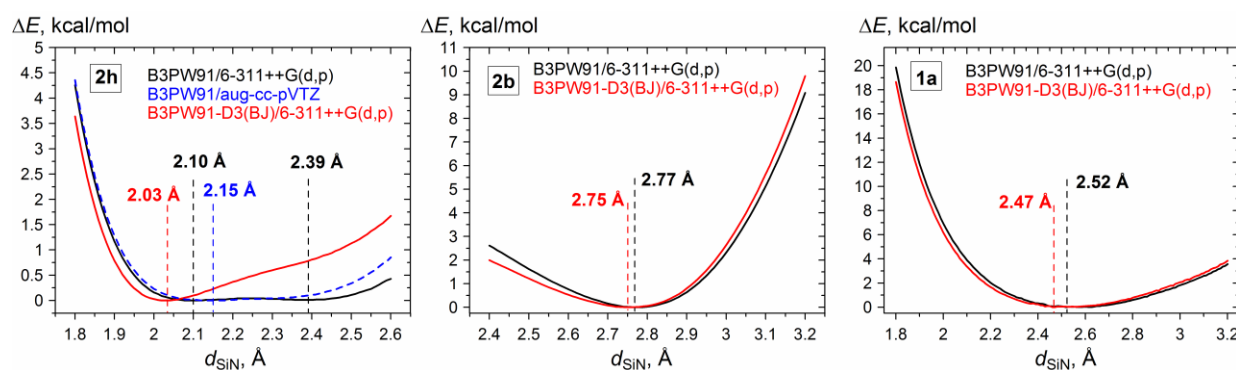

**Figure S5.** Potential functions of the Si...N contact deformation in the anti-conformer of  $(\text{F}_3\text{C})\text{F}_2\text{SiONMe}_2$  (**2h**),  $\text{F}_3\text{SiCH}_2\text{NMe}_2$  (**2b**), and 1-methylsilatrane (**1a**) calculated at the B3PW91 and B3PW91-D3(BJ) theory levels.

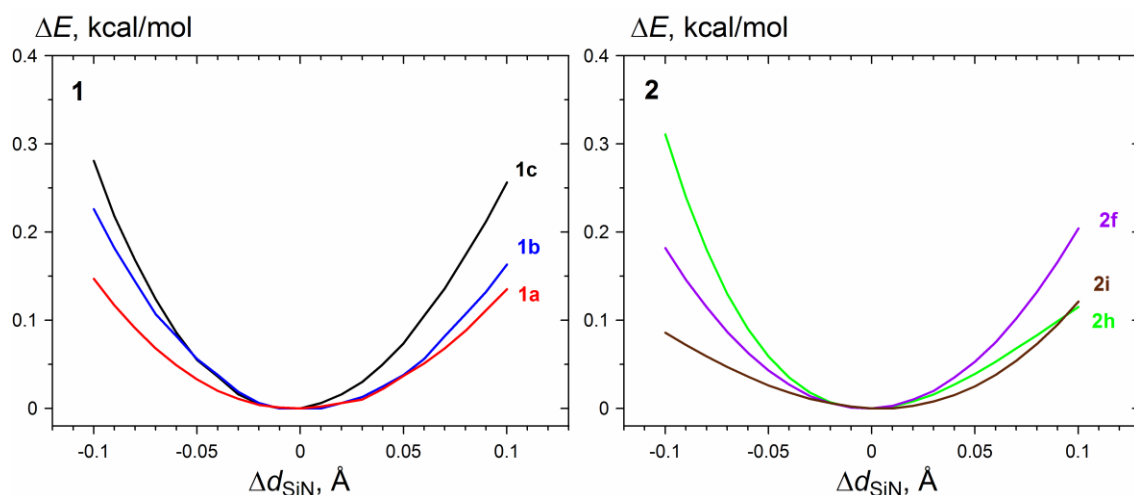

**Figure S6.** MP2/6-311++G(d,p) potential functions of the Si...N contact deformation in molecules **1** and **2**.

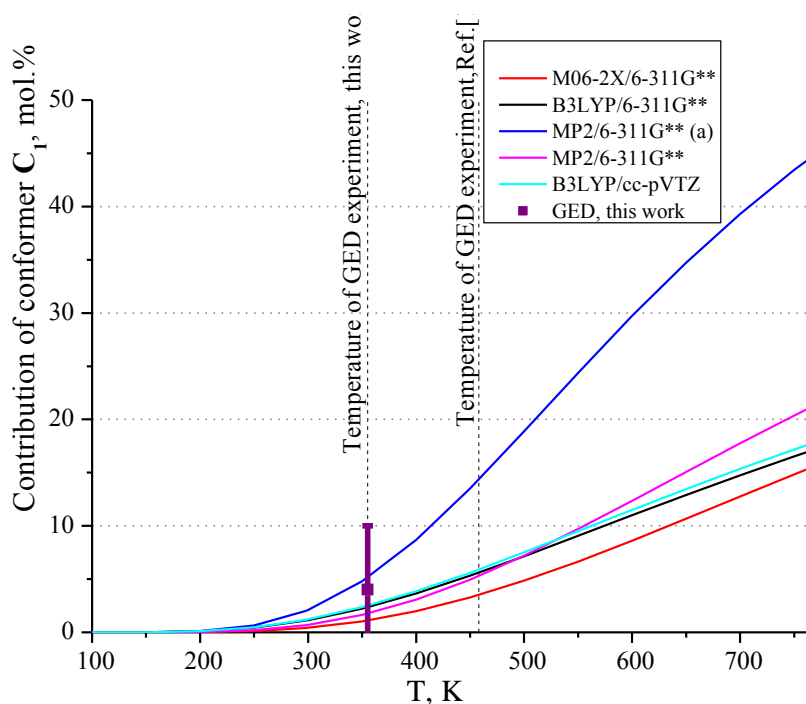

**Figure S7.** Temperature dependence of conformer  $C_1$  concentration in gas phase as predicted on the base of theoretical calculations at «rigid rotor — harmonic oscillator» approximation. All calculations for conformer  $C_3$  were performed for  $C_1$  equilibrium symmetry which in fact is a quasi- $C_3$  one (very close to), but, due to difficulties intrinsic to the Gaussian program to keep the symmetry, it was not completely reached. The MP2 results marked by “(a)” correspond to real  $C_3$  symmetry which was easily realized in case of this kind of calculations. Temperature of the GED experiments, from Shen et al (*J. Mol. Struct.* 1980; 64: 257) and this work, along with the GED data of this work, are shown.

**Table S1.** Starting (QC) and refined (GED) values for internuclear distances ( $r_a$ ,  $r_{hl}$ ) and vibrational amplitudes ( $l$ ) of 1-methylsilatrane based on the B3LYP/6-311G\*\* calculations

| Param. # | Atoms | N1 | N2 | Multiplicity | Starting values |          |       | Refined values <sup>b</sup> |          |          | Vibrational corrections $\Delta r^a$ | Gr. # <sup>c</sup> |
|----------|-------|----|----|--------------|-----------------|----------|-------|-----------------------------|----------|----------|--------------------------------------|--------------------|
|          |       |    |    |              | $r_a$           | $r_{hl}$ | $l$   | $r_a$                       | $r_{hl}$ | $l$      |                                      |                    |
| 69       | C H   | 15 | 30 | 3            | 1.0909          | 1.093    | 0.077 | 1.10845                     | 1.104(2) | 0.081(2) | 0.0017                               | 1                  |
| 70       | C H   | 12 | 23 | 2            | 1.0916          | 1.093    | 0.077 | 1.10916                     | 1.104(2) | 0.081(2) | 0.00121                              | 1                  |
| 71       | C H   | 10 | 19 | 1            | 1.0916          | 1.093    | 0.077 | 1.10916                     | 1.104(2) | 0.081(2) | 0.00121                              | 1                  |
| 72       | C H   | 13 | 25 | 3            | 1.0926          | 1.094    | 0.077 | 1.11019                     | 1.105(2) | 0.081(2) | 0.00116                              | 1                  |
| 73       | C H   | 13 | 24 | 3            | 1.0967          | 1.098    | 0.078 | 1.11427                     | 1.109(2) | 0.082(2) | 0.00104                              | 1                  |
| 74       | C H   | 10 | 18 | 3            | 1.0988          | 1.1      | 0.078 | 1.11643                     | 1.112(2) | 0.083(2) | 0.00134                              | 1                  |
| 75       | O C   | 7  | 11 | 2            | 1.4127          | 1.415    | 0.049 | 1.41939                     | 1.420(3) | 0.053(2) | 0.00278                              | 1                  |
| 76       | O C   | 6  | 9  | 1            | 1.4127          | 1.415    | 0.049 | 1.41939                     | 1.420(3) | 0.053(2) | 0.00278                              | 1                  |
| 77       | N C   | 2  | 12 | 1            | 1.5063          | 1.503    | 0.049 | 1.46455                     | 1.459(3) | 0.053(2) | -0.00373                             | 1                  |
| 78       | N C   | 2  | 10 | 2            | 1.5063          | 1.503    | 0.049 | 1.46455                     | 1.459(3) | 0.053(2) | -0.00373                             | 1                  |
| 79       | C C   | 13 | 14 | 1            | 1.5371          | 1.536    | 0.053 | 1.53086                     | 1.527(3) | 0.058(2) | -0.00123                             | 1                  |
| 80       | C C   | 11 | 12 | 1            | 1.5371          | 1.536    | 0.053 | 1.53086                     | 1.527(3) | 0.058(2) | -0.00123                             | 1                  |
| 81       | C C   | 9  | 10 | 1            | 1.5371          | 1.536    | 0.053 | 1.53086                     | 1.527(3) | 0.058(2) | -0.00124                             | 1                  |
| 82       | Si O  | 1  | 6  | 2            | 1.6681          | 1.671    | 0.047 | 1.66528                     | 1.667(3) | 0.051(2) | 0.00305                              | 1                  |
| 83       | Si O  | 1  | 7  | 1            | 1.668           | 1.671    | 0.047 | 1.66518                     | 1.667(3) | 0.051(2) | 0.00307                              | 1                  |
| 84       | H H   | 18 | 19 | 1            | 1.839           | 1.847    | 0.124 | 2.06711                     | 2.067(4) | 0.128(2) | 0.00836                              | 1                  |
| 85       | H H   | 22 | 23 | 1            | 1.839           | 1.847    | 0.124 | 2.06711                     | 2.067(4) | 0.128(2) | 0.00834                              | 1                  |
| 86       | H H   | 26 | 27 | 1            | 1.839           | 1.847    | 0.124 | 2.06711                     | 2.067(4) | 0.128(2) | 0.00834                              | 1                  |
| 87       | H H   | 16 | 17 | 2            | 1.7612          | 1.769    | 0.123 | 1.79526                     | 1.794(4) | 0.127(2) | 0.00765                              | 1                  |
| 88       | H H   | 24 | 25 | 1            | 1.7612          | 1.769    | 0.123 | 1.79526                     | 1.794(4) | 0.127(2) | 0.00765                              | 1                  |
| 89       | H H   | 28 | 29 | 3            | 1.7589          | 1.771    | 0.125 | 1.78702                     | 1.790(4) | 0.129(2) | 0.0121                               | 1                  |
| 90       | Si C  | 1  | 15 | 1            | 1.8582          | 1.858    | 0.052 | 1.84905                     | 1.847(4) | 0.057(2) | -5.3E-4                              | 1                  |
| 91       | O H   | 7  | 21 | 3            | 2.0329          | 2.04     | 0.101 | 2.03214                     | 2.035(4) | 0.098(2) | 0.00722                              | 2                  |
| 92       | O H   | 7  | 20 | 2            | 2.0584          | 2.065    | 0.101 | 2.08389                     | 2.086(4) | 0.098(2) | 0.00657                              | 2                  |
| 93       | O H   | 6  | 16 | 1            | 2.0584          | 2.065    | 0.101 | 2.08389                     | 2.086(4) | 0.098(2) | 0.00657                              | 2                  |
| 94       | N H   | 2  | 19 | 3            | 2.1132          | 2.116    | 0.103 | 2.13047                     | 2.128(4) | 0.100(2) | 0.00263                              | 2                  |
| 95       | N H   | 2  | 18 | 1            | 2.175           | 2.177    | 0.103 | 2.08433                     | 2.081(4) | 0.100(2) | 0.00189                              | 2                  |
| 96       | N H   | 2  | 22 | 2            | 2.175           | 2.177    | 0.103 | 2.08433                     | 2.081(4) | 0.100(2) | 0.00191                              | 2                  |
| 97       | C H   | 13 | 27 | 1            | 2.1481          | 2.153    | 0.11  | 1.6688                      | 1.667(3) | 0.106(2) | 0.00531                              | 2                  |
| 98       | C H   | 11 | 23 | 1            | 2.1482          | 2.153    | 0.11  | 1.6689                      | 1.667(3) | 0.106(2) | 0.00527                              | 2                  |
| 99       | C H   | 9  | 19 | 1            | 2.1481          | 2.153    | 0.11  | 1.6688                      | 1.667(3) | 0.106(2) | 0.00531                              | 2                  |
| 100      | C H   | 14 | 25 | 2            | 2.1678          | 2.172    | 0.108 | 2.1325                      | 2.132(4) | 0.105(2) | 0.00432                              | 2                  |
| 101      | C H   | 12 | 21 | 1            | 2.1679          | 2.172    | 0.108 | 2.13261                     | 2.132(4) | 0.105(2) | 0.00428                              | 2                  |
| 102      | C H   | 14 | 24 | 1            | 2.1689          | 2.172    | 0.108 | 2.17495                     | 2.173(4) | 0.105(2) | 0.00343                              | 2                  |
| 103      | C H   | 12 | 20 | 1            | 2.1688          | 2.172    | 0.108 | 2.17495                     | 2.173(4) | 0.105(2) | 0.00347                              | 2                  |
| 104      | C H   | 10 | 16 | 1            | 2.1689          | 2.172    | 0.108 | 2.17495                     | 2.173(4) | 0.105(2) | 0.00343                              | 2                  |
| 105      | C H   | 9  | 18 | 3            | 2.1706          | 2.175    | 0.11  | 2.15349                     | 2.152(4) | 0.107(2) | 0.00429                              | 2                  |
| 106      | H H   | 19 | 24 | 1            | 2.3948          | 2.406    | 0.289 | 2.43808                     | 2.415(5) | 0.286(2) | 0.01129                              | 2                  |
| 107      | H H   | 20 | 27 | 1            | 2.3964          | 2.406    | 0.288 | 2.43954                     | 2.415(5) | 0.285(2) | 0.00973                              | 2                  |
| 108      | H H   | 16 | 23 | 1            | 2.3945          | 2.406    | 0.289 | 2.43788                     | 2.415(5) | 0.286(2) | 0.01156                              | 2                  |
| 109      | H H   | 17 | 19 | 1            | 2.4209          | 2.43     | 0.174 | 1.85444                     | 1.848(4) | 0.171(2) | 0.00948                              | 2                  |
| 110      | H H   | 21 | 23 | 1            | 2.4209          | 2.43     | 0.174 | 1.85444                     | 1.848(4) | 0.171(2) | 0.00943                              | 2                  |
| 111      | H H   | 25 | 27 | 1            | 2.4209          | 2.43     | 0.174 | 1.85442                     | 1.848(4) | 0.171(2) | 0.00949                              | 2                  |
| 112      | O C   | 8  | 14 | 1            | 2.4249          | 2.432    | 0.07  | 2.4698                      | 2.475(5) | 0.067(2) | 0.0068                               | 2                  |
| 113      | O C   | 7  | 12 | 1            | 2.4248          | 2.432    | 0.07  | 2.46969                     | 2.475(5) | 0.067(2) | 0.00689                              | 2                  |
| 114      | O C   | 6  | 10 | 1            | 2.4248          | 2.432    | 0.07  | 2.4697                      | 2.475(5) | 0.067(2) | 0.00683                              | 2                  |
| 115      | H H   | 19 | 26 | 1            | 2.2851          | 2.28     | 0.227 | 2.68649                     | 2.662(5) | 0.224(2) | -0.00554                             | 2                  |
| 116      | H H   | 18 | 23 | 1            | 2.2844          | 2.28     | 0.227 | 2.68578                     | 2.662(5) | 0.224(2) | -0.00487                             | 2                  |
| 117      | H H   | 22 | 27 | 1            | 2.286           | 2.28     | 0.227 | 2.68742                     | 2.662(5) | 0.224(2) | -0.00648                             | 2                  |
| 118      | N C   | 2  | 11 | 2            | 2.3521          | 2.352    | 0.071 | 2.37565                     | 2.374(5) | 0.068(2) | 1.3E-4                               | 2                  |
| 119      | N C   | 2  | 9  | 1            | 2.3522          | 2.352    | 0.071 | 2.37565                     | 2.374(5) | 0.068(2) | 5E-5                                 | 2                  |
| 120      | H H   | 16 | 18 | 1            | 2.3998          | 2.407    | 0.178 | 2.33642                     | 2.331(5) | 0.175(2) | 0.00758                              | 2                  |
| 121      | H H   | 20 | 22 | 1            | 2.3996          | 2.407    | 0.178 | 2.33632                     | 2.331(5) | 0.175(2) | 0.00772                              | 2                  |
| 122      | H H   | 24 | 26 | 1            | 2.3997          | 2.407    | 0.178 | 2.33642                     | 2.331(5) | 0.175(2) | 0.0076                               | 2                  |
| 123      | Si H  | 1  | 28 | 1            | 2.4554          | 2.465    | 0.124 | 2.45968                     | 2.463(5) | 0.121(2) | 0.0095                               | 2                  |
| 124      | Si H  | 1  | 29 | 1            | 2.458           | 2.465    | 0.124 | 2.46227                     | 2.463(5) | 0.121(2) | 0.00693                              | 2                  |
| 125      | Si H  | 1  | 30 | 1            | 2.458           | 2.465    | 0.124 | 2.46227                     | 2.463(5) | 0.121(2) | 0.00688                              | 2                  |
| 126      | C C   | 10 | 14 | 2            | 2.499           | 2.498    | 0.07  | 2.46638                     | 2.463(5) | 0.066(2) | -0.00114                             | 2                  |
| 127      | C C   | 10 | 12 | 1            | 2.4986          | 2.498    | 0.07  | 2.46589                     | 2.463(5) | 0.066(2) | -6.7E-4                              | 2                  |
| 128      | C H   | 14 | 19 | 1            | 2.5014          | 2.499    | 0.143 | 2.73284                     | 2.723(5) | 0.140(2) | -0.00275                             | 2                  |
| 129      | C H   | 12 | 27 | 1            | 2.5023          | 2.499    | 0.143 | 2.73373                     | 2.723(5) | 0.139(2) | -0.0036                              | 2                  |

|     |      |    |    |   |        |       |       |         |          |          |          |   |
|-----|------|----|----|---|--------|-------|-------|---------|----------|----------|----------|---|
| 130 | C H  | 10 | 23 | 1 | 2.501  | 2.499 | 0.143 | 2.73244 | 2.723(5) | 0.140(2) | -0.00232 | 2 |
| 131 | H H  | 25 | 26 | 1 | 2.6151 | 2.622 | 0.167 | 2.62368 | 2.620(5) | 0.164(2) | 0.00701  | 2 |
| 132 | H H  | 21 | 22 | 1 | 2.6153 | 2.622 | 0.167 | 2.62379 | 2.620(5) | 0.164(2) | 0.00687  | 2 |
| 133 | H H  | 17 | 18 | 1 | 2.6152 | 2.622 | 0.167 | 2.62369 | 2.620(5) | 0.164(2) | 0.00696  | 2 |
| 134 | Si N | 1  | 2  | 1 | 2.4265 | 2.449 | 0.182 | 2.50375 | 2.514(5) | 0.179(2) | 0.02276  | 2 |
| 135 | C H  | 12 | 18 | 1 | 2.5795 | 2.581 | 0.156 | 2.50717 | 2.499(5) | 0.153(2) | 0.0014   | 2 |
| 136 | C H  | 14 | 22 | 1 | 2.5805 | 2.581 | 0.156 | 2.50817 | 2.499(5) | 0.153(2) | 4.1E-4   | 2 |
| 137 | C H  | 10 | 26 | 1 | 2.5799 | 2.581 | 0.156 | 2.50756 | 2.499(5) | 0.153(2) | 1E-3     | 2 |
| 138 | Si C | 1  | 13 | 1 | 2.7311 | 2.746 | 0.069 | 2.72641 | 2.740(5) | 0.066(2) | 0.01532  | 2 |
| 139 | Si C | 1  | 9  | 2 | 2.7311 | 2.746 | 0.069 | 2.72641 | 2.740(5) | 0.066(2) | 0.0153   | 2 |
| 140 | O H  | 8  | 27 | 1 | 2.7382 | 2.754 | 0.166 | 2.26574 | 2.270(5) | 0.163(2) | 0.01619  | 2 |
| 141 | O H  | 7  | 23 | 1 | 2.7382 | 2.754 | 0.166 | 2.26576 | 2.270(5) | 0.163(2) | 0.01615  | 2 |
| 142 | O H  | 6  | 19 | 1 | 2.7381 | 2.754 | 0.166 | 2.26576 | 2.270(5) | 0.163(2) | 0.01622  | 2 |
| 143 | N O  | 2  | 7  | 1 | 2.5609 | 2.571 | 0.113 | 2.67749 | 2.683(5) | 0.110(2) | 0.00995  | 2 |
| 144 | N O  | 2  | 6  | 1 | 2.5612 | 2.571 | 0.113 | 2.67768 | 2.683(5) | 0.110(2) | 0.00973  | 2 |
| 145 | N O  | 2  | 8  | 1 | 2.5611 | 2.571 | 0.113 | 2.67768 | 2.683(5) | 0.110(2) | 0.00976  | 2 |
| 146 | O O  | 6  | 8  | 1 | 2.779  | 2.79  | 0.095 | 2.80414 | 2.812(6) | 0.092(2) | 0.01069  | 2 |
| 147 | O O  | 7  | 8  | 1 | 2.7797 | 2.79  | 0.096 | 2.80475 | 2.812(6) | 0.092(2) | 0.01001  | 2 |
| 148 | O O  | 6  | 7  | 1 | 2.7789 | 2.79  | 0.096 | 2.80404 | 2.812(6) | 0.092(2) | 0.01079  | 2 |
| 149 | O C  | 6  | 15 | 1 | 2.8018 | 2.81  | 0.102 | 2.74863 | 2.754(5) | 0.098(2) | 0.00869  | 2 |
| 150 | O C  | 7  | 15 | 1 | 2.8026 | 2.81  | 0.102 | 2.74943 | 2.754(5) | 0.099(2) | 0.00788  | 2 |
| 151 | O C  | 8  | 15 | 1 | 2.8017 | 2.81  | 0.102 | 2.74853 | 2.754(5) | 0.098(2) | 0.00878  | 2 |
| 152 | N H  | 2  | 24 | 1 | 2.7227 | 2.729 | 0.156 | 2.81459 | 2.813(6) | 0.152(2) | 0.00622  | 2 |
| 153 | N H  | 2  | 20 | 1 | 2.7227 | 2.729 | 0.156 | 2.8146  | 2.813(6) | 0.153(2) | 0.0062   | 2 |
| 154 | N H  | 2  | 16 | 1 | 2.7228 | 2.729 | 0.156 | 2.8147  | 2.813(6) | 0.153(2) | 0.00617  | 2 |
| 155 | C H  | 11 | 27 | 1 | 2.8731 | 2.883 | 0.208 | 2.87474 | 2.870(6) | 0.205(2) | 0.00958  | 2 |
| 156 | C H  | 13 | 19 | 1 | 2.8719 | 2.883 | 0.209 | 2.87362 | 2.870(6) | 0.206(2) | 0.01078  | 2 |
| 157 | C H  | 9  | 23 | 1 | 2.8716 | 2.883 | 0.209 | 2.87332 | 2.870(6) | 0.206(2) | 0.01112  | 2 |
| 158 | O H  | 6  | 28 | 1 | 2.9608 | 2.972 | 0.247 | 2.91838 | 2.910(6) | 0.244(2) | 0.01164  | 2 |
| 159 | O H  | 7  | 29 | 1 | 2.9652 | 2.972 | 0.247 | 2.92275 | 2.910(6) | 0.244(2) | 0.00723  | 2 |
| 160 | O H  | 8  | 30 | 1 | 2.9638 | 2.972 | 0.247 | 2.92124 | 2.909(6) | 0.243(2) | 0.00869  | 2 |
| 161 | C H  | 10 | 24 | 1 | 2.9855 | 3.002 | 0.218 | 3.03434 | 3.036(6) | 0.214(2) | 0.01658  | 2 |
| 162 | C H  | 14 | 20 | 1 | 2.9865 | 3.002 | 0.218 | 3.03536 | 3.036(6) | 0.215(2) | 0.01553  | 2 |
| 163 | C H  | 12 | 16 | 1 | 2.9852 | 3.002 | 0.218 | 3.03407 | 3.036(6) | 0.215(2) | 0.01683  | 2 |
| 164 | H H  | 24 | 27 | 2 | 3.0434 | 3.059 | 0.126 | 2.67025 | 2.679(5) | 0.130(3) | 0.01519  | 3 |
| 165 | H H  | 16 | 19 | 1 | 3.0434 | 3.059 | 0.126 | 2.67025 | 2.679(5) | 0.130(3) | 0.01519  | 3 |
| 166 | O H  | 6  | 24 | 1 | 3.0221 | 3.06  | 0.327 | 3.31754 | 3.322(7) | 0.330(3) | 0.03753  | 3 |
| 167 | O H  | 8  | 20 | 1 | 3.0231 | 3.06  | 0.329 | 3.31891 | 3.322(7) | 0.333(3) | 0.03661  | 3 |
| 168 | O H  | 7  | 16 | 1 | 3.0215 | 3.06  | 0.328 | 3.31715 | 3.322(7) | 0.331(3) | 0.03815  | 3 |
| 169 | Si H | 1  | 24 | 1 | 3.0401 | 3.063 | 0.181 | 3.16777 | 3.180(6) | 0.184(3) | 0.02323  | 3 |
| 170 | Si H | 1  | 20 | 1 | 3.0402 | 3.063 | 0.181 | 3.16796 | 3.180(6) | 0.185(3) | 0.02318  | 3 |
| 171 | Si H | 1  | 16 | 1 | 3.04   | 3.063 | 0.181 | 3.16771 | 3.180(6) | 0.185(3) | 0.02336  | 3 |
| 172 | O H  | 6  | 29 | 1 | 3.0844 | 3.104 | 0.252 | 3.04825 | 3.046(6) | 0.256(3) | 0.01988  | 3 |
| 173 | O H  | 8  | 28 | 1 | 3.0816 | 3.104 | 0.252 | 3.04547 | 3.046(6) | 0.256(3) | 0.02264  | 3 |
| 174 | O H  | 7  | 30 | 1 | 3.0863 | 3.104 | 0.252 | 3.05016 | 3.046(6) | 0.256(3) | 0.01794  | 3 |
| 175 | C C  | 10 | 13 | 1 | 3.1551 | 3.165 | 0.11  | 3.12235 | 3.128(6) | 0.114(3) | 0.01     | 3 |
| 176 | C C  | 11 | 14 | 1 | 3.1559 | 3.165 | 0.11  | 3.12314 | 3.128(6) | 0.114(3) | 0.00922  | 3 |
| 177 | C C  | 9  | 12 | 1 | 3.155  | 3.165 | 0.11  | 3.12215 | 3.128(6) | 0.114(3) | 0.01018  | 3 |
| 178 | H H  | 22 | 26 | 1 | 3.014  | 3.021 | 0.229 | 2.96117 | 2.949(6) | 0.233(3) | 0.00651  | 3 |
| 179 | H H  | 18 | 22 | 1 | 3.0132 | 3.021 | 0.229 | 2.96037 | 2.949(6) | 0.233(3) | 0.00735  | 3 |
| 180 | H H  | 18 | 26 | 1 | 3.0135 | 3.021 | 0.229 | 2.96065 | 2.949(6) | 0.233(3) | 0.007    | 3 |
| 181 | C H  | 12 | 26 | 1 | 3.1272 | 3.134 | 0.137 | 3.09306 | 3.093(6) | 0.141(3) | 0.00669  | 3 |
| 182 | C H  | 10 | 22 | 1 | 3.1267 | 3.134 | 0.137 | 3.09256 | 3.093(6) | 0.141(3) | 0.00718  | 3 |
| 183 | C H  | 14 | 18 | 1 | 3.1269 | 3.134 | 0.137 | 3.09266 | 3.093(6) | 0.141(3) | 0.00705  | 3 |
| 184 | Si C | 1  | 14 | 1 | 3.194  | 3.213 | 0.105 | 3.15956 | 3.175(6) | 0.109(3) | 0.0189   | 3 |
| 185 | Si C | 1  | 10 | 1 | 3.194  | 3.213 | 0.105 | 3.15966 | 3.175(6) | 0.109(3) | 0.01887  | 3 |
| 186 | Si C | 1  | 12 | 1 | 3.1941 | 3.213 | 0.105 | 3.15975 | 3.175(6) | 0.109(3) | 0.01878  | 3 |
| 187 | O C  | 6  | 13 | 1 | 3.257  | 3.279 | 0.184 | 3.37603 | 3.388(7) | 0.187(3) | 0.02193  | 3 |
| 188 | O C  | 8  | 11 | 1 | 3.2579 | 3.279 | 0.185 | 3.37697 | 3.387(7) | 0.189(3) | 0.02106  | 3 |
| 189 | O C  | 7  | 9  | 1 | 3.2567 | 3.279 | 0.184 | 3.37569 | 3.388(7) | 0.188(3) | 0.0223   | 3 |
| 190 | O H  | 7  | 22 | 2 | 3.3437 | 3.36  | 0.102 | 3.35664 | 3.370(7) | 0.106(3) | 0.01658  | 3 |
| 191 | O H  | 6  | 18 | 1 | 3.3437 | 3.36  | 0.102 | 3.35664 | 3.370(7) | 0.106(3) | 0.01656  | 3 |
| 192 | C H  | 12 | 19 | 1 | 3.3734 | 3.381 | 0.104 | 3.4047  | 3.409(7) | 0.108(3) | 0.00745  | 3 |
| 193 | C H  | 14 | 23 | 2 | 3.3736 | 3.381 | 0.104 | 3.4049  | 3.409(7) | 0.108(3) | 0.00721  | 3 |
| 194 | N H  | 2  | 21 | 1 | 3.3111 | 3.321 | 0.103 | 3.29564 | 3.302(7) | 0.106(3) | 0.0095   | 3 |
| 195 | N H  | 2  | 25 | 1 | 3.3111 | 3.321 | 0.103 | 3.29564 | 3.302(7) | 0.106(3) | 0.00949  | 3 |
| 196 | N H  | 2  | 17 | 1 | 3.3111 | 3.321 | 0.103 | 3.29574 | 3.302(7) | 0.106(3) | 0.00941  | 3 |

|     |      |    |    |   |        |       |       |         |          |           |         |   |
|-----|------|----|----|---|--------|-------|-------|---------|----------|-----------|---------|---|
| 197 | H H  | 19 | 27 | 1 | 3.5377 | 3.549 | 0.157 | 3.67428 | 3.678(7) | 0.161(3)  | 0.01111 | 3 |
| 198 | H H  | 23 | 27 | 1 | 3.5384 | 3.549 | 0.157 | 3.67488 | 3.678(7) | 0.161(3)  | 0.01044 | 3 |
| 199 | H H  | 19 | 23 | 1 | 3.5373 | 3.549 | 0.157 | 3.67388 | 3.678(7) | 0.161(3)  | 0.01151 | 3 |
| 200 | C H  | 9  | 24 | 1 | 3.5364 | 3.562 | 0.266 | 3.65867 | 3.664(7) | 0.270(3)  | 0.02571 | 3 |
| 201 | C H  | 13 | 20 | 1 | 3.5377 | 3.562 | 0.268 | 3.66021 | 3.664(7) | 0.272(3)  | 0.02446 | 3 |
| 202 | C H  | 11 | 16 | 1 | 3.5359 | 3.562 | 0.267 | 3.65827 | 3.664(7) | 0.271(3)  | 0.02626 | 3 |
| 203 | O C  | 7  | 14 | 1 | 3.5573 | 3.576 | 0.113 | 3.52897 | 3.544(7) | 0.117(3)  | 0.0191  | 3 |
| 204 | O C  | 8  | 10 | 1 | 3.557  | 3.576 | 0.113 | 3.52877 | 3.544(7) | 0.117(3)  | 0.01936 | 3 |
| 205 | O C  | 6  | 12 | 1 | 3.557  | 3.576 | 0.113 | 3.52867 | 3.544(7) | 0.117(3)  | 0.01937 | 3 |
| 206 | O C  | 6  | 14 | 1 | 3.5853 | 3.601 | 0.12  | 3.65633 | 3.668(7) | 0.124(3)  | 0.01591 | 3 |
| 207 | O C  | 7  | 10 | 1 | 3.5851 | 3.601 | 0.121 | 3.65604 | 3.668(7) | 0.124(3)  | 0.01619 | 3 |
| 208 | O C  | 8  | 12 | 1 | 3.5859 | 3.601 | 0.121 | 3.65685 | 3.668(7) | 0.125(3)  | 0.01539 | 3 |
| 209 | O H  | 7  | 27 | 1 | 3.575  | 3.606 | 0.236 | 3.31906 | 3.333(7) | 0.240(3)  | 0.03099 | 3 |
| 210 | C C  | 9  | 14 | 1 | 3.606  | 3.613 | 0.081 | 3.58539 | 3.591(7) | 0.085(3)  | 0.00731 | 3 |
| 211 | C C  | 12 | 13 | 1 | 3.6064 | 3.613 | 0.081 | 3.5858  | 3.591(7) | 0.085(3)  | 0.00683 | 3 |
| 212 | C C  | 10 | 11 | 1 | 3.6058 | 3.613 | 0.081 | 3.5852  | 3.591(7) | 0.085(3)  | 0.00751 | 3 |
| 213 | O H  | 8  | 19 | 1 | 3.5746 | 3.606 | 0.236 | 3.31866 | 3.333(7) | 0.240(3)  | 0.03143 | 3 |
| 214 | O H  | 6  | 23 | 1 | 3.5745 | 3.606 | 0.236 | 3.31858 | 3.333(7) | 0.240(3)  | 0.03154 | 3 |
| 215 | Si H | 1  | 27 | 1 | 3.5825 | 3.614 | 0.2   | 3.16463 | 3.183(6) | 0.203(3)  | 0.03145 | 3 |
| 216 | Si H | 1  | 23 | 1 | 3.5827 | 3.614 | 0.2   | 3.16481 | 3.183(6) | 0.203(3)  | 0.03124 | 3 |
| 217 | Si H | 1  | 19 | 1 | 3.5827 | 3.614 | 0.199 | 3.1648  | 3.183(6) | 0.203(3)  | 0.03129 | 3 |
| 218 | Si H | 1  | 25 | 1 | 3.604  | 3.631 | 0.102 | 3.58026 | 3.604(7) | 0.106(3)  | 0.02713 | 3 |
| 219 | Si H | 1  | 17 | 1 | 3.604  | 3.631 | 0.102 | 3.58026 | 3.604(7) | 0.106(3)  | 0.02715 | 3 |
| 220 | Si H | 1  | 21 | 1 | 3.604  | 3.631 | 0.103 | 3.58017 | 3.604(7) | 0.106(3)  | 0.02721 | 3 |
| 221 | O C  | 7  | 13 | 1 | 3.706  | 3.726 | 0.089 | 3.68062 | 3.698(7) | 0.092(3)  | 0.01967 | 3 |
| 222 | O C  | 8  | 9  | 1 | 3.7055 | 3.726 | 0.089 | 3.68012 | 3.698(7) | 0.092(3)  | 0.02018 | 3 |
| 223 | O C  | 6  | 11 | 1 | 3.7055 | 3.726 | 0.089 | 3.68002 | 3.698(7) | 0.092(3)  | 0.02021 | 3 |
| 224 | O H  | 6  | 30 | 1 | 3.7161 | 3.759 | 0.12  | 3.68397 | 3.722(7) | 0.124(3)  | 0.04252 | 3 |
| 225 | O H  | 7  | 28 | 1 | 3.7153 | 3.759 | 0.12  | 3.68307 | 3.722(7) | 0.124(3)  | 0.04338 | 3 |
| 226 | O H  | 8  | 29 | 1 | 3.7161 | 3.759 | 0.12  | 3.68397 | 3.722(7) | 0.124(3)  | 0.04254 | 3 |
| 227 | H H  | 19 | 25 | 1 | 3.7924 | 3.807 | 0.228 | 3.90479 | 3.906(8) | 0.232(3)  | 0.0149  | 3 |
| 228 | H H  | 21 | 27 | 1 | 3.7939 | 3.807 | 0.227 | 3.90623 | 3.906(8) | 0.231(3)  | 0.01349 | 3 |
| 229 | H H  | 17 | 23 | 1 | 3.792  | 3.807 | 0.228 | 3.90439 | 3.906(8) | 0.232(3)  | 0.01537 | 3 |
| 230 | C C  | 9  | 13 | 1 | 3.8048 | 3.822 | 0.131 | 3.80296 | 3.816(8) | 0.134(3)  | 0.01746 | 3 |
| 231 | C C  | 11 | 13 | 1 | 3.8057 | 3.822 | 0.131 | 3.80391 | 3.816(8) | 0.135(3)  | 0.01655 | 3 |
| 232 | C C  | 9  | 11 | 1 | 3.8045 | 3.822 | 0.131 | 3.80268 | 3.816(8) | 0.135(3)  | 0.01775 | 3 |
| 233 | H H  | 19 | 22 | 1 | 3.8511 | 3.862 | 0.166 | 4.02805 | 4.031(8) | 0.170(3)  | 0.01049 | 3 |
| 234 | H H  | 23 | 26 | 1 | 3.8512 | 3.862 | 0.166 | 4.02805 | 4.031(8) | 0.170(3)  | 0.01042 | 3 |
| 235 | H H  | 18 | 27 | 1 | 3.8512 | 3.862 | 0.166 | 4.02804 | 4.031(8) | 0.170(3)  | 0.01042 | 3 |
| 236 | H H  | 18 | 24 | 1 | 3.9689 | 4.001 | 0.245 | 4.01846 | 4.035(8) | 0.249(3)  | 0.03242 | 3 |
| 237 | H H  | 20 | 26 | 1 | 3.9699 | 4.001 | 0.245 | 4.01932 | 4.035(8) | 0.248(3)  | 0.03148 | 3 |
| 238 | H H  | 16 | 22 | 1 | 3.9687 | 4.001 | 0.245 | 4.01827 | 4.035(8) | 0.249(3)  | 0.0326  | 3 |
| 239 | H H  | 17 | 24 | 1 | 3.998  | 4.031 | 0.311 | 4.01548 | 4.023(8) | 0.315(3)  | 0.03256 | 3 |
| 240 | H H  | 20 | 25 | 1 | 3.9998 | 4.031 | 0.312 | 4.01744 | 4.023(8) | 0.316(3)  | 0.03083 | 3 |
| 241 | H H  | 16 | 21 | 1 | 3.9973 | 4.031 | 0.312 | 4.01486 | 4.023(8) | 0.316(3)  | 0.03333 | 3 |
| 242 | C H  | 11 | 18 | 1 | 3.9382 | 3.951 | 0.157 | 3.87392 | 3.880(8) | 0.169(10) | 0.01319 | 4 |
| 243 | C H  | 9  | 26 | 1 | 3.9386 | 3.951 | 0.157 | 3.87432 | 3.880(8) | 0.169(10) | 0.0128  | 4 |
| 244 | C H  | 13 | 22 | 1 | 3.9391 | 3.951 | 0.157 | 3.87494 | 3.880(8) | 0.170(10) | 0.01226 | 4 |
| 245 | C H  | 11 | 26 | 1 | 4.081  | 4.104 | 0.151 | 4.05432 | 4.070(8) | 0.164(10) | 0.02255 | 4 |
| 246 | C H  | 13 | 18 | 1 | 4.0804 | 4.104 | 0.151 | 4.05374 | 4.070(8) | 0.164(10) | 0.02317 | 4 |
| 247 | C H  | 9  | 22 | 1 | 4.0803 | 4.104 | 0.151 | 4.05354 | 4.070(8) | 0.164(10) | 0.02328 | 4 |
| 248 | C C  | 9  | 15 | 1 | 4.1086 | 4.131 | 0.104 | 4.09602 | 4.115(8) | 0.117(10) | 0.0228  | 4 |
| 249 | C C  | 13 | 15 | 1 | 4.1083 | 4.131 | 0.104 | 4.09582 | 4.116(8) | 0.117(10) | 0.02303 | 4 |
| 250 | C C  | 11 | 15 | 1 | 4.1092 | 4.131 | 0.104 | 4.09672 | 4.116(8) | 0.117(10) | 0.02214 | 4 |
| 251 | C H  | 12 | 24 | 1 | 4.165  | 4.181 | 0.15  | 4.20585 | 4.216(8) | 0.163(10) | 0.01608 | 4 |
| 252 | C H  | 10 | 20 | 1 | 4.1647 | 4.181 | 0.151 | 4.20557 | 4.216(8) | 0.164(10) | 0.01641 | 4 |
| 253 | C H  | 14 | 16 | 1 | 4.1648 | 4.181 | 0.15  | 4.20566 | 4.216(8) | 0.163(10) | 0.01634 | 4 |
| 254 | C H  | 10 | 25 | 1 | 4.1647 | 4.184 | 0.135 | 4.1415  | 4.155(8) | 0.148(10) | 0.01891 | 4 |
| 255 | C H  | 14 | 21 | 1 | 4.1655 | 4.184 | 0.135 | 4.14229 | 4.155(8) | 0.148(10) | 0.01809 | 4 |
| 256 | C H  | 12 | 17 | 1 | 4.1644 | 4.184 | 0.135 | 4.1413  | 4.155(8) | 0.148(10) | 0.01915 | 4 |
| 257 | Si H | 1  | 18 | 1 | 4.1071 | 4.138 | 0.127 | 4.05704 | 4.083(8) | 0.140(10) | 0.03059 | 4 |
| 258 | Si H | 1  | 26 | 1 | 4.1071 | 4.138 | 0.127 | 4.05704 | 4.083(8) | 0.140(10) | 0.03058 | 4 |
| 259 | Si H | 1  | 22 | 1 | 4.1072 | 4.138 | 0.127 | 4.05714 | 4.083(8) | 0.140(10) | 0.03053 | 4 |
| 260 | H H  | 24 | 28 | 1 | 4.2427 | 4.25  | 0.31  | 4.39482 | 4.378(9) | 0.323(10) | 0.00711 | 4 |
| 261 | H H  | 16 | 29 | 1 | 4.2471 | 4.25  | 0.31  | 4.39913 | 4.378(9) | 0.323(10) | 0.00275 | 4 |
| 262 | H H  | 20 | 30 | 1 | 4.2483 | 4.25  | 0.31  | 4.40037 | 4.378(9) | 0.323(10) | 0.00153 | 4 |
| 263 | C H  | 13 | 28 | 1 | 4.2503 | 4.273 | 0.255 | 4.28829 | 4.294(9) | 0.268(10) | 0.02264 | 4 |

|     |     |    |    |   |        |       |       |         |           |           |         |   |
|-----|-----|----|----|---|--------|-------|-------|---------|-----------|-----------|---------|---|
| 264 | C H | 9  | 29 | 1 | 4.2539 | 4.273 | 0.255 | 4.29178 | 4.294(9)  | 0.268(10) | 0.01908 | 4 |
| 265 | C H | 11 | 30 | 1 | 4.2555 | 4.273 | 0.255 | 4.29348 | 4.294(9)  | 0.268(10) | 0.01743 | 4 |
| 266 | O H | 7  | 18 | 1 | 4.1611 | 4.189 | 0.185 | 4.21199 | 4.230(8)  | 0.198(10) | 0.02764 | 4 |
| 267 | O H | 6  | 26 | 1 | 4.1615 | 4.189 | 0.185 | 4.21239 | 4.230(8)  | 0.198(10) | 0.02726 | 4 |
| 268 | O H | 8  | 22 | 1 | 4.162  | 4.189 | 0.185 | 4.21292 | 4.230(8)  | 0.198(10) | 0.02674 | 4 |
| 269 | O H | 7  | 24 | 1 | 4.2793 | 4.31  | 0.177 | 4.38798 | 4.410(9)  | 0.190(10) | 0.0305  | 4 |
| 270 | O H | 6  | 20 | 1 | 4.279  | 4.31  | 0.178 | 4.38774 | 4.410(9)  | 0.191(10) | 0.03076 | 4 |
| 271 | O H | 8  | 16 | 1 | 4.279  | 4.31  | 0.178 | 4.3876  | 4.410(9)  | 0.191(10) | 0.03084 | 4 |
| 272 | O H | 6  | 25 | 1 | 4.2866 | 4.322 | 0.205 | 4.41933 | 4.444(9)  | 0.217(10) | 0.03528 | 4 |
| 273 | O H | 8  | 21 | 1 | 4.2874 | 4.322 | 0.206 | 4.42025 | 4.444(9)  | 0.219(10) | 0.03448 | 4 |
| 274 | O H | 7  | 17 | 1 | 4.2862 | 4.322 | 0.205 | 4.41898 | 4.444(9)  | 0.218(10) | 0.03568 | 4 |
| 275 | C H | 15 | 24 | 1 | 4.3142 | 4.342 | 0.199 | 4.43037 | 4.448(9)  | 0.212(10) | 0.02795 | 4 |
| 276 | C H | 15 | 16 | 1 | 4.3147 | 4.342 | 0.199 | 4.43089 | 4.448(9)  | 0.212(10) | 0.02745 | 4 |
| 277 | C H | 15 | 20 | 1 | 4.3152 | 4.342 | 0.2   | 4.43141 | 4.448(9)  | 0.212(10) | 0.02694 | 4 |
| 278 | O H | 6  | 27 | 1 | 4.3322 | 4.36  | 0.148 | 4.11293 | 4.135(8)  | 0.161(10) | 0.02815 | 4 |
| 279 | O H | 8  | 23 | 1 | 4.3326 | 4.36  | 0.148 | 4.11334 | 4.135(8)  | 0.161(10) | 0.02779 | 4 |
| 280 | O H | 7  | 19 | 1 | 4.3321 | 4.36  | 0.148 | 4.11274 | 4.135(8)  | 0.161(10) | 0.02832 | 4 |
| 281 | C H | 9  | 28 | 1 | 4.3447 | 4.378 | 0.256 | 4.31241 | 4.329(9)  | 0.269(10) | 0.03297 | 4 |
| 282 | C H | 11 | 29 | 1 | 4.3489 | 4.378 | 0.256 | 4.31659 | 4.329(9)  | 0.269(10) | 0.02874 | 4 |
| 283 | C H | 13 | 30 | 1 | 4.3474 | 4.378 | 0.256 | 4.31508 | 4.329(9)  | 0.269(10) | 0.03024 | 4 |
| 284 | C H | 14 | 17 | 1 | 4.4119 | 4.429 | 0.131 | 4.33731 | 4.349(9)  | 0.144(10) | 0.01693 | 4 |
| 285 | C H | 10 | 21 | 1 | 4.4116 | 4.429 | 0.131 | 4.33701 | 4.349(9)  | 0.144(10) | 0.01724 | 4 |
| 286 | C H | 12 | 25 | 1 | 4.4125 | 4.429 | 0.132 | 4.33791 | 4.349(9)  | 0.144(10) | 0.0163  | 4 |
| 287 | C H | 13 | 23 | 2 | 4.4164 | 4.434 | 0.116 | 4.31334 | 4.327(9)  | 0.129(10) | 0.01757 | 4 |
| 288 | C H | 11 | 19 | 1 | 4.4163 | 4.434 | 0.116 | 4.31324 | 4.327(9)  | 0.129(10) | 0.01769 | 4 |
| 289 | H H | 16 | 24 | 1 | 4.4646 | 4.503 | 0.275 | 4.63998 | 4.661(9)  | 0.287(10) | 0.03853 | 4 |
| 290 | H H | 20 | 24 | 1 | 4.4657 | 4.503 | 0.276 | 4.64118 | 4.661(9)  | 0.289(10) | 0.03745 | 4 |
| 291 | H H | 16 | 20 | 1 | 4.4642 | 4.503 | 0.275 | 4.63958 | 4.661(9)  | 0.288(10) | 0.03899 | 4 |
| 292 | C H | 13 | 17 | 1 | 4.4991 | 4.529 | 0.185 | 4.41986 | 4.441(9)  | 0.198(10) | 0.02965 | 4 |
| 293 | C H | 11 | 25 | 1 | 4.5004 | 4.529 | 0.185 | 4.42108 | 4.441(9)  | 0.198(10) | 0.02842 | 4 |
| 294 | C H | 9  | 21 | 1 | 4.4986 | 4.529 | 0.185 | 4.41937 | 4.441(9)  | 0.198(10) | 0.03015 | 4 |
| 295 | O H | 8  | 17 | 1 | 4.508  | 4.543 | 0.14  | 4.40054 | 4.430(9)  | 0.153(10) | 0.03529 | 4 |
| 296 | O H | 7  | 25 | 1 | 4.5088 | 4.543 | 0.14  | 4.40122 | 4.430(9)  | 0.153(10) | 0.03455 | 4 |
| 297 | O H | 6  | 21 | 1 | 4.5078 | 4.543 | 0.14  | 4.40023 | 4.430(9)  | 0.153(10) | 0.03552 | 4 |
| 298 | N C | 2  | 15 | 1 | 4.2832 | 4.307 | 0.183 | 4.34558 | 4.360(9)  | 0.196(10) | 0.02376 | 4 |
| 299 | C H | 11 | 24 | 1 | 4.5536 | 4.582 | 0.175 | 4.63051 | 4.651(9)  | 0.188(10) | 0.0284  | 4 |
| 300 | C H | 13 | 16 | 1 | 4.5529 | 4.582 | 0.174 | 4.62988 | 4.651(9)  | 0.187(10) | 0.02908 | 4 |
| 301 | C H | 9  | 20 | 1 | 4.5528 | 4.582 | 0.175 | 4.62973 | 4.651(9)  | 0.188(10) | 0.02923 | 4 |
| 302 | O H | 7  | 26 | 1 | 4.5367 | 4.569 | 0.134 | 4.52047 | 4.548(9)  | 0.147(10) | 0.03208 | 4 |
| 303 | O H | 8  | 18 | 1 | 4.5365 | 4.569 | 0.134 | 4.52037 | 4.548(9)  | 0.147(10) | 0.03224 | 4 |
| 304 | O H | 6  | 22 | 1 | 4.5365 | 4.569 | 0.134 | 4.52037 | 4.548(9)  | 0.147(10) | 0.03224 | 4 |
| 305 | H H | 17 | 26 | 1 | 4.5592 | 4.578 | 0.214 | 4.42428 | 4.431(9)  | 0.227(10) | 0.01881 | 4 |
| 306 | H H | 18 | 21 | 1 | 4.5587 | 4.578 | 0.214 | 4.42377 | 4.431(9)  | 0.227(10) | 0.01932 | 4 |
| 307 | H H | 22 | 25 | 1 | 4.56   | 4.578 | 0.214 | 4.42499 | 4.431(9)  | 0.227(10) | 0.0181  | 4 |
| 308 | H H | 22 | 24 | 1 | 4.5859 | 4.608 | 0.178 | 4.55634 | 4.570(9)  | 0.191(10) | 0.02218 | 4 |
| 309 | H H | 18 | 20 | 1 | 4.5853 | 4.608 | 0.178 | 4.55574 | 4.571(9)  | 0.191(10) | 0.02283 | 4 |
| 310 | H H | 16 | 26 | 1 | 4.5856 | 4.608 | 0.178 | 4.55594 | 4.570(9)  | 0.191(10) | 0.02255 | 4 |
| 311 | C H | 15 | 17 | 1 | 4.7408 | 4.777 | 0.15  | 4.72061 | 4.752(9)  | 0.163(10) | 0.03667 | 4 |
| 312 | C H | 15 | 21 | 2 | 4.7411 | 4.777 | 0.15  | 4.72091 | 4.752(9)  | 0.163(10) | 0.03637 | 4 |
| 313 | H H | 16 | 28 | 1 | 4.7278 | 4.78  | 0.295 | 4.79908 | 4.832(10) | 0.308(10) | 0.05264 | 4 |
| 314 | H H | 24 | 30 | 1 | 4.7296 | 4.78  | 0.295 | 4.80086 | 4.832(10) | 0.308(10) | 0.05084 | 4 |
| 315 | H H | 20 | 29 | 1 | 4.7313 | 4.78  | 0.295 | 4.80256 | 4.832(10) | 0.308(10) | 0.04917 | 4 |
| 316 | H H | 17 | 28 | 1 | 4.7831 | 4.822 | 0.318 | 4.72085 | 4.737(9)  | 0.331(10) | 0.03908 | 4 |
| 317 | H H | 21 | 29 | 1 | 4.7875 | 4.822 | 0.318 | 4.72513 | 4.737(9)  | 0.331(10) | 0.0347  | 4 |
| 318 | H H | 25 | 30 | 1 | 4.7858 | 4.822 | 0.318 | 4.72342 | 4.737(9)  | 0.331(10) | 0.0364  | 4 |
| 319 | H H | 23 | 24 | 1 | 4.7984 | 4.822 | 0.199 | 4.84458 | 4.859(10) | 0.212(10) | 0.0236  | 4 |
| 320 | H H | 19 | 20 | 1 | 4.7988 | 4.822 | 0.199 | 4.845   | 4.859(10) | 0.212(10) | 0.02326 | 4 |
| 321 | H H | 16 | 27 | 1 | 4.7986 | 4.822 | 0.199 | 4.84479 | 4.859(10) | 0.212(10) | 0.02341 | 4 |
| 322 | H H | 25 | 28 | 1 | 4.8194 | 4.86  | 0.319 | 4.89302 | 4.911(10) | 0.332(10) | 0.04016 | 4 |
| 323 | H H | 17 | 29 | 1 | 4.8224 | 4.86  | 0.319 | 4.89602 | 4.911(10) | 0.332(10) | 0.03717 | 4 |
| 324 | H H | 21 | 30 | 1 | 4.8245 | 4.859 | 0.319 | 4.89822 | 4.911(10) | 0.332(10) | 0.03498 | 4 |
| 325 | C H | 9  | 25 | 1 | 4.8826 | 4.913 | 0.155 | 4.89476 | 4.920(10) | 0.168(10) | 0.0307  | 4 |
| 326 | C H | 13 | 21 | 1 | 4.8835 | 4.913 | 0.156 | 4.89571 | 4.920(10) | 0.169(10) | 0.02983 | 4 |
| 327 | C H | 11 | 17 | 1 | 4.8823 | 4.913 | 0.155 | 4.89448 | 4.920(10) | 0.168(10) | 0.03104 | 4 |
| 328 | C C | 14 | 15 | 1 | 4.9182 | 4.944 | 0.117 | 4.87418 | 4.896(10) | 0.130(10) | 0.02558 | 4 |
| 329 | C C | 10 | 15 | 1 | 4.9183 | 4.944 | 0.117 | 4.87417 | 4.896(10) | 0.130(10) | 0.02551 | 4 |
| 330 | C C | 12 | 15 | 1 | 4.9187 | 4.944 | 0.117 | 4.87467 | 4.896(10) | 0.130(10) | 0.02505 | 4 |



|     |     |    |    |   |        |       |       |         |           |           |         |   |
|-----|-----|----|----|---|--------|-------|-------|---------|-----------|-----------|---------|---|
| 331 | N H | 2  | 29 | 2 | 4.7681 | 4.802 | 0.23  | 4.83895 | 4.861(10) | 0.243(10) | 0.03411 | 4 |
| 332 | N H | 2  | 30 | 1 | 4.7699 | 4.802 | 0.23  | 4.84066 | 4.861(10) | 0.243(10) | 0.03239 | 4 |
| 333 | C H | 13 | 29 | 1 | 4.9837 | 5.043 | 0.128 | 4.98537 | 5.041(10) | 0.141(10) | 0.05959 | 4 |
| 334 | C H | 9  | 30 | 1 | 4.984  | 5.043 | 0.128 | 4.98576 | 5.041(10) | 0.141(10) | 0.05925 | 4 |
| 335 | C H | 11 | 28 | 1 | 4.9826 | 5.043 | 0.128 | 4.98436 | 5.041(10) | 0.141(10) | 0.06064 | 4 |
| 336 | H H | 21 | 26 | 1 | 5.0283 | 5.058 | 0.177 | 5.00071 | 5.024(10) | 0.190(10) | 0.0302  | 4 |
| 337 | H H | 18 | 25 | 1 | 5.0276 | 5.058 | 0.177 | 5.00002 | 5.024(10) | 0.190(10) | 0.0309  | 4 |
| 338 | H H | 17 | 22 | 1 | 5.0275 | 5.059 | 0.177 | 4.99992 | 5.024(10) | 0.190(10) | 0.03107 | 4 |
| 339 | H H | 24 | 29 | 1 | 5.1546 | 5.222 | 0.248 | 5.30968 | 5.364(11) | 0.261(10) | 0.06721 | 4 |
| 340 | H H | 20 | 28 | 1 | 5.154  | 5.222 | 0.249 | 5.30914 | 5.364(11) | 0.262(10) | 0.06775 | 4 |
| 341 | H H | 16 | 30 | 1 | 5.1556 | 5.222 | 0.248 | 5.3107  | 5.364(11) | 0.261(10) | 0.06622 | 4 |
| 342 | C H | 10 | 28 | 1 | 5.2046 | 5.235 | 0.225 | 5.15531 | 5.175(10) | 0.238(10) | 0.03067 | 4 |
| 343 | C H | 12 | 29 | 1 | 5.209  | 5.235 | 0.225 | 5.15971 | 5.175(10) | 0.238(10) | 0.02627 | 4 |
| 344 | C H | 14 | 30 | 1 | 5.2081 | 5.235 | 0.225 | 5.15881 | 5.175(10) | 0.238(10) | 0.02714 | 4 |
| 345 | C H | 15 | 27 | 1 | 5.2121 | 5.251 | 0.226 | 4.6956  | 4.722(9)  | 0.239(10) | 0.03884 | 4 |
| 346 | C H | 15 | 23 | 1 | 5.2127 | 5.251 | 0.226 | 4.69618 | 4.722(9)  | 0.239(10) | 0.03824 | 4 |
| 347 | C H | 15 | 19 | 1 | 5.212  | 5.251 | 0.226 | 4.69546 | 4.722(9)  | 0.239(10) | 0.03892 | 4 |
| 348 | C H | 14 | 28 | 1 | 5.2805 | 5.314 | 0.21  | 5.27265 | 5.297(11) | 0.223(10) | 0.03334 | 4 |
| 349 | C H | 10 | 29 | 1 | 5.284  | 5.314 | 0.21  | 5.27614 | 5.297(11) | 0.223(10) | 0.02982 | 4 |
| 350 | C H | 12 | 30 | 1 | 5.285  | 5.314 | 0.21  | 5.27714 | 5.296(11) | 0.223(10) | 0.0288  | 4 |
| 351 | H H | 17 | 27 | 1 | 5.3172 | 5.347 | 0.141 | 5.16179 | 5.187(10) | 0.154(10) | 0.02953 | 4 |
| 352 | H H | 19 | 21 | 1 | 5.317  | 5.347 | 0.141 | 5.16159 | 5.187(10) | 0.154(10) | 0.02969 | 4 |
| 353 | H H | 23 | 25 | 1 | 5.3175 | 5.347 | 0.141 | 5.16209 | 5.187(10) | 0.154(10) | 0.02922 | 4 |
| 354 | H H | 27 | 30 | 1 | 5.3177 | 5.344 | 0.316 | 4.76799 | 4.767(9)  | 0.358(86) | 0.02635 | 5 |
| 355 | H H | 23 | 29 | 1 | 5.3186 | 5.344 | 0.316 | 4.76885 | 4.767(9)  | 0.357(86) | 0.02543 | 5 |
| 356 | H H | 19 | 28 | 1 | 5.3136 | 5.344 | 0.316 | 4.76395 | 4.767(9)  | 0.357(86) | 0.03038 | 5 |
| 357 | H H | 17 | 25 | 1 | 5.5443 | 5.589 | 0.221 | 5.49802 | 5.530(11) | 0.263(86) | 0.04458 | 5 |
| 358 | H H | 21 | 25 | 1 | 5.5455 | 5.589 | 0.222 | 5.49935 | 5.530(11) | 0.264(86) | 0.04329 | 5 |
| 359 | H H | 17 | 21 | 1 | 5.5437 | 5.589 | 0.221 | 5.49743 | 5.530(11) | 0.263(86) | 0.04517 | 5 |
| 360 | H H | 21 | 24 | 1 | 5.6275 | 5.67  | 0.186 | 5.70275 | 5.736(11) | 0.228(86) | 0.04216 | 5 |
| 361 | H H | 16 | 25 | 1 | 5.6269 | 5.67  | 0.186 | 5.70213 | 5.736(11) | 0.228(86) | 0.04273 | 5 |
| 362 | H H | 17 | 20 | 1 | 5.6268 | 5.67  | 0.187 | 5.70207 | 5.736(11) | 0.229(86) | 0.04289 | 5 |
| 363 | C H | 14 | 29 | 1 | 5.6223 | 5.673 | 0.161 | 5.58524 | 5.629(11) | 0.202(86) | 0.05108 | 5 |
| 364 | C H | 12 | 28 | 1 | 5.6199 | 5.673 | 0.161 | 5.58284 | 5.629(11) | 0.202(86) | 0.05351 | 5 |
| 365 | C H | 10 | 30 | 1 | 5.6223 | 5.673 | 0.161 | 5.58524 | 5.629(11) | 0.202(86) | 0.05111 | 5 |
| 366 | H H | 27 | 28 | 1 | 5.7048 | 5.762 | 0.274 | 5.19881 | 5.237(10) | 0.315(86) | 0.05739 | 5 |
| 367 | H H | 23 | 30 | 1 | 5.7091 | 5.762 | 0.274 | 5.20308 | 5.237(10) | 0.315(86) | 0.05307 | 5 |
| 368 | H H | 19 | 29 | 1 | 5.7076 | 5.762 | 0.273 | 5.20157 | 5.237(10) | 0.315(86) | 0.05456 | 5 |
| 369 | H H | 17 | 30 | 1 | 5.6897 | 5.773 | 0.158 | 5.67397 | 5.750(11) | 0.200(86) | 0.08323 | 5 |
| 370 | H H | 21 | 28 | 2 | 5.6893 | 5.773 | 0.158 | 5.67347 | 5.750(11) | 0.200(86) | 0.08369 | 5 |
| 371 | C H | 15 | 18 | 1 | 5.8354 | 5.875 | 0.135 | 5.77861 | 5.813(12) | 0.177(86) | 0.03935 | 5 |
| 372 | C H | 15 | 26 | 1 | 5.8353 | 5.875 | 0.135 | 5.77851 | 5.813(12) | 0.177(86) | 0.03951 | 5 |
| 373 | C H | 15 | 22 | 1 | 5.8358 | 5.875 | 0.135 | 5.77901 | 5.813(12) | 0.177(86) | 0.03899 | 5 |
| 374 | H H | 27 | 29 | 1 | 5.909  | 5.976 | 0.27  | 5.45129 | 5.500(11) | 0.312(86) | 0.06676 | 5 |
| 375 | H H | 23 | 28 | 1 | 5.9065 | 5.976 | 0.27  | 5.44878 | 5.500(11) | 0.312(86) | 0.06929 | 5 |
| 376 | H H | 19 | 30 | 1 | 5.9085 | 5.976 | 0.27  | 5.45075 | 5.500(11) | 0.311(86) | 0.0673  | 5 |
| 377 | H H | 18 | 29 | 1 | 6.0981 | 6.136 | 0.238 | 6.06844 | 6.093(12) | 0.280(86) | 0.03742 | 5 |
| 378 | H H | 26 | 28 | 1 | 6.0942 | 6.136 | 0.238 | 6.06456 | 6.093(12) | 0.280(86) | 0.04132 | 5 |
| 379 | H H | 22 | 30 | 1 | 6.099  | 6.136 | 0.238 | 6.06935 | 6.093(12) | 0.280(86) | 0.03657 | 5 |
| 380 | H H | 18 | 28 | 1 | 6.1895 | 6.239 | 0.235 | 6.13275 | 6.169(12) | 0.277(86) | 0.04924 | 5 |
| 381 | H H | 22 | 29 | 1 | 6.1938 | 6.239 | 0.235 | 6.13694 | 6.169(12) | 0.277(86) | 0.04498 | 5 |
| 382 | H H | 26 | 30 | 1 | 6.1928 | 6.239 | 0.235 | 6.13604 | 6.169(12) | 0.277(86) | 0.04596 | 5 |
| 383 | H H | 26 | 29 | 2 | 6.5293 | 6.597 | 0.175 | 6.48259 | 6.543(13) | 0.217(86) | 0.06748 | 5 |
| 384 | H H | 22 | 28 | 1 | 6.5268 | 6.597 | 0.175 | 6.48019 | 6.543(13) | 0.217(86) | 0.06995 | 5 |

<sup>[a]</sup>  $r_{hl}$  values ( $r_{hl}=r_a+\Delta r$ ) are given for GED results. The vibrational corrections  $\Delta r$  were calculated by the Vibmodule program (Vishnevskiy et al, *J. Phys.: Conf. Ser.*, 2015, **633**, 012076) using the so called second approximation, in which harmonic approach with nonlinear relation between Cartesian and internal coordinates were applied on the base of the force field estimated in the quantum chemical calculations at B3LYP/6-311G\*\* level.

<sup>[b]</sup> Values in parentheses for the GED data are full errors estimated as  $\sigma(r_{hl})=[\sigma_{scale}^2+(2.5\sigma_{LS})^2]^{1/2}$ , where  $\sigma_{scale}=0.002r$  and  $\sigma_{LS}$  is a standard deviation in least-squares refinement for internuclear distances and as  $3\sigma_{LS}$  for vibration amplitudes. The place-value is such that the last digit of the uncertainty lines up with the last digit of the nominal value.

<sup>[c]</sup> All amplitudes were refined being united in 5 groups. The differences between the amplitudes within each group were constrained to the calculated values.

Atomic coordinates of the refined structure of 1-methylsilatrane (for the C<sub>3</sub> conformer) based on the B3LYP/6-311G\*\* calculations

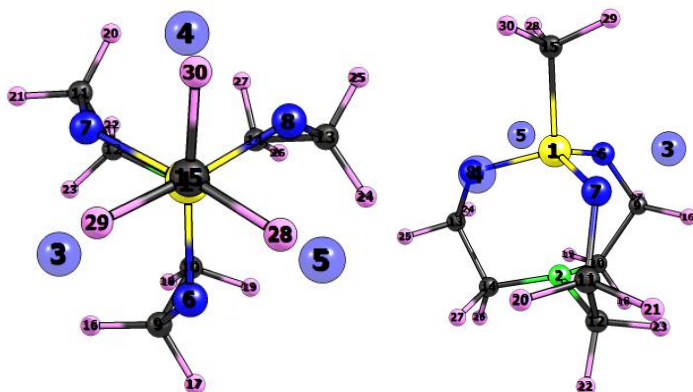

| Atom # | Nucleus charge | X       | Y       | Z       |
|--------|----------------|---------|---------|---------|
| 1.     | 14             | 0.      | 0.      | 0.      |
| 2.     | 7              | 0.      | 0.      | 2.5137  |
| 3.     | 0              | 2       | 0.      | 0.      |
| 4.     | 0              | -1.     | 1.7321  | 0.      |
| 5.     | 0              | -1.     | -1.7321 | 0.      |
| 6.     | 8              | 1.1479  | -1.1479 | 0.3776  |
| 7.     | 8              | 0.4202  | 1.5681  | 0.3776  |
| 8.     | 8              | -1.5681 | -0.4202 | 0.3776  |
| 9.     | 6              | 1.8096  | -1.2564 | 1.6295  |
| 10.    | 6              | 0.8872  | -1.1117 | 2.8383  |
| 11.    | 6              | 0.1833  | 2.1953  | 1.6295  |
| 12.    | 6              | 0.5192  | 1.3241  | 2.8383  |
| 13.    | 6              | -1.9928 | -0.9389 | 1.6295  |
| 14.    | 6              | -1.4063 | -0.2125 | 2.8383  |
| 15.    | 6              | 0.      | 0.      | -1.8468 |
| 16.    | 1              | 2.6394  | -0.5232 | 1.6952  |
| 17.    | 1              | 2.2426  | -2.2725 | 1.6725  |
| 18.    | 1              | 1.5023  | -0.8015 | 3.7108  |
| 19.    | 1              | 0.5459  | -2.0523 | 2.3709  |
| 20.    | 1              | -0.8666 | 2.5474  | 1.6952  |
| 21.    | 1              | 0.8467  | 3.0784  | 1.6725  |
| 22.    | 1              | -0.0571 | 1.7018  | 3.7108  |
| 23.    | 1              | 1.5044  | 1.4989  | 2.3709  |
| 24.    | 1              | -1.7729 | -2.0242 | 1.6952  |
| 25.    | 1              | -3.0893 | -0.8059 | 1.6725  |
| 26.    | 1              | -1.4452 | -0.9003 | 3.7108  |
| 27.    | 1              | -2.0503 | 0.5534  | 2.3709  |
| 28.    | 1              | -0.1247 | -1.0258 | -2.236  |
| 29.    | 1              | 0.9507  | 0.4049  | -2.236  |
| 30.    | 1              | -0.826  | 0.6208  | -2.236  |

**Table S2.** Starting (QC) and refined (GED) values for internuclear distances ( $r_a$ ,  $r_{hl}$ ) and vibrational amplitudes ( $l$ ) of 1-methylsilatrane based on the MP2/6-311G\*\* calculations

| Param. # | Atoms | N1 | N2 | Multiplicity | Starting values |          |       | Refined values <sup>b</sup> |          |          | Vibrational corrections $\Delta r^a$ | Gr. # <sup>c</sup> |
|----------|-------|----|----|--------------|-----------------|----------|-------|-----------------------------|----------|----------|--------------------------------------|--------------------|
|          |       |    |    |              | $r_a$           | $r_{hl}$ | $l$   | $r_a$                       | $r_{hl}$ | $l$      |                                      |                    |
| 70       | C H   | 15 | 29 | 3            | 1.0913          | 1.093    | 0.076 | 1.10498                     | 1.101(2) | 0.077(2) | 0.00166                              | 1                  |
| 71       | C H   | 12 | 23 | 1            | 1.0926          | 1.094    | 0.076 | 1.1063                      | 1.102(2) | 0.077(2) | 0.00122                              | 1                  |
| 72       | C H   | 14 | 27 | 2            | 1.0926          | 1.094    | 0.076 | 1.1063                      | 1.102(2) | 0.077(2) | 0.0012                               | 1                  |
| 73       | C H   | 13 | 25 | 3            | 1.0931          | 1.094    | 0.076 | 1.10681                     | 1.103(2) | 0.077(2) | 0.00113                              | 1                  |
| 74       | C H   | 11 | 20 | 3            | 1.0979          | 1.099    | 0.077 | 1.1117                      | 1.107(2) | 0.078(2) | 0.00101                              | 1                  |
| 75       | C H   | 12 | 22 | 3            | 1.0988          | 1.1      | 0.077 | 1.1126                      | 1.109(2) | 0.078(2) | 0.0014                               | 1                  |
| 76       | O C   | 7  | 11 | 3            | 1.4069          | 1.409    | 0.048 | 1.40978                     | 1.410(3) | 0.049(2) | 0.00224                              | 1                  |
| 77       | N C   | 2  | 10 | 3            | 1.4615          | 1.459    | 0.049 | 1.48107                     | 1.476(3) | 0.050(2) | -0.003                               | 1                  |
| 78       | C C   | 9  | 10 | 3            | 1.5295          | 1.529    | 0.051 | 1.52221                     | 1.519(3) | 0.052(2) | -1E-3                                | 1                  |
| 79       | Si O  | 1  | 8  | 3            | 1.6799          | 1.682    | 0.047 | 1.66791                     | 1.668(3) | 0.048(2) | 0.00167                              | 1                  |
| 80       | H H   | 28 | 29 | 3            | 1.7599          | 1.772    | 0.124 | 1.77977                     | 1.783(4) | 0.125(2) | 0.01174                              | 1                  |
| 81       | H H   | 20 | 21 | 3            | 1.7675          | 1.775    | 0.122 | 1.87566                     | 1.875(4) | 0.123(2) | 0.00745                              | 1                  |
| 82       | H H   | 22 | 23 | 3            | 1.771           | 1.779    | 0.123 | 1.6546                      | 1.653(3) | 0.124(2) | 0.00789                              | 1                  |
| 83       | Si C  | 1  | 15 | 1            | 1.8585          | 1.858    | 0.052 | 1.8505                      | 1.848(4) | 0.053(2) | -7.7E-4                              | 1                  |
| 84       | O H   | 7  | 21 | 3            | 2.0352          | 2.041    | 0.1   | 2.04198                     | 2.044(4) | 0.097(3) | 0.00622                              | 2                  |
| 85       | O H   | 6  | 16 | 3            | 2.0594          | 2.065    | 0.1   | 2.12385                     | 2.126(4) | 0.096(3) | 0.00603                              | 2                  |
| 86       | N H   | 2  | 19 | 3            | 2.0747          | 2.078    | 0.102 | 2.1641                      | 2.163(4) | 0.099(3) | 0.00352                              | 2                  |
| 87       | N H   | 2  | 18 | 3            | 2.1347          | 2.138    | 0.102 | 2.23833                     | 2.237(4) | 0.098(3) | 0.00315                              | 2                  |
| 88       | C H   | 9  | 19 | 3            | 2.1424          | 2.148    | 0.109 | 2.10446                     | 2.105(4) | 0.105(3) | 0.00545                              | 2                  |
| 89       | C H   | 10 | 16 | 3            | 2.1631          | 2.167    | 0.106 | 2.14085                     | 2.140(4) | 0.103(3) | 0.00371                              | 2                  |
| 90       | C H   | 14 | 25 | 2            | 2.1658          | 2.171    | 0.107 | 2.00545                     | 2.005(4) | 0.103(3) | 0.00472                              | 2                  |
| 91       | C H   | 10 | 17 | 1            | 2.1658          | 2.171    | 0.107 | 2.00545                     | 2.005(4) | 0.103(3) | 0.00473                              | 2                  |
| 92       | C H   | 11 | 22 | 3            | 2.1907          | 2.195    | 0.108 | 2.18571                     | 2.185(4) | 0.104(3) | 0.00397                              | 2                  |
| 93       | H H   | 16 | 23 | 3            | 2.2686          | 2.27     | 0.264 | 2.63249                     | 2.608(5) | 0.260(3) | 0.00178                              | 2                  |
| 94       | N C   | 2  | 11 | 2            | 2.3938          | 2.395    | 0.064 | 2.44219                     | 2.442(5) | 0.060(3) | 0.00107                              | 2                  |
| 95       | N C   | 2  | 13 | 1            | 2.3937          | 2.395    | 0.064 | 2.4421                      | 2.442(5) | 0.060(3) | 0.00111                              | 2                  |
| 96       | O C   | 8  | 14 | 3            | 2.3889          | 2.396    | 0.066 | 2.39594                     | 2.401(5) | 0.063(3) | 0.00694                              | 2                  |
| 97       | Si N  | 1  | 2  | 1            | 2.3935          | 2.419    | 0.15  | 2.48124                     | 2.498(5) | 0.146(3) | 0.02512                              | 2                  |
| 98       | H H   | 25 | 27 | 3            | 2.4222          | 2.433    | 0.173 | 2.07443                     | 2.071(4) | 0.169(3) | 0.01035                              | 2                  |
| 99       | H H   | 18 | 23 | 3            | 2.4433          | 2.441    | 0.224 | 2.65434                     | 2.634(5) | 0.220(3) | -0.0023                              | 2                  |
| 100      | Si H  | 1  | 30 | 3            | 2.4571          | 2.465    | 0.124 | 2.46028                     | 2.462(5) | 0.120(3) | 0.00809                              | 2                  |
| 101      | C C   | 10 | 14 | 3            | 2.4728          | 2.47     | 0.069 | 2.51332                     | 2.509(5) | 0.066(3) | -0.00259                             | 2                  |
| 102      | H H   | 16 | 18 | 3            | 2.4698          | 2.478    | 0.175 | 2.43635                     | 2.432(5) | 0.172(3) | 0.00802                              | 2                  |
| 103      | C H   | 10 | 23 | 3            | 2.4885          | 2.486    | 0.141 | 2.60951                     | 2.600(5) | 0.137(3) | -0.00233                             | 2                  |
| 104      | H H   | 25 | 26 | 3            | 2.5959          | 2.602    | 0.162 | 2.43368                     | 2.429(5) | 0.159(3) | 0.0059                               | 2                  |
| 105      | N O   | 2  | 8  | 3            | 2.6385          | 2.649    | 0.089 | 2.66202                     | 2.670(5) | 0.085(3) | 0.01095                              | 2                  |
| 106      | C H   | 12 | 18 | 3            | 2.6619          | 2.662    | 0.153 | 2.83983                     | 2.832(6) | 0.149(3) | 3.1E-4                               | 2                  |
| 107      | O H   | 8  | 27 | 3            | 2.695           | 2.711    | 0.162 | 2.76933                     | 2.776(6) | 0.159(3) | 0.01578                              | 2                  |
| 108      | Si C  | 1  | 11 | 3            | 2.7064          | 2.72     | 0.067 | 2.73855                     | 2.750(5) | 0.063(3) | 0.0134                               | 2                  |
| 109      | O C   | 8  | 15 | 3            | 2.7403          | 2.748    | 0.1   | 2.75205                     | 2.757(5) | 0.096(3) | 0.00785                              | 2                  |
| 110      | N H   | 2  | 16 | 3            | 2.7477          | 2.755    | 0.152 | 2.87568                     | 2.875(6) | 0.148(3) | 0.00692                              | 2                  |
| 111      | C H   | 9  | 23 | 3            | 2.778           | 2.785    | 0.194 | 3.04657                     | 3.042(6) | 0.189(5) | 0.00692                              | 3                  |
| 112      | O O   | 7  | 8  | 2            | 2.8438          | 2.851    | 0.095 | 2.81695                     | 2.822(6) | 0.091(3) | 0.00764                              | 2                  |
| 113      | O O   | 6  | 8  | 1            | 2.8435          | 2.851    | 0.095 | 2.80516                     | 2.810(6) | 0.091(3) | 0.00796                              | 2                  |
| 114      | O H   | 8  | 30 | 3            | 2.8865          | 2.899    | 0.237 | 2.92412                     | 2.918(6) | 0.233(3) | 0.01225                              | 2                  |
| 115      | C H   | 12 | 16 | 3            | 2.9212          | 2.932    | 0.205 | 3.13943                     | 3.138(6) | 0.200(5) | 0.01109                              | 3                  |
| 116      | H H   | 18 | 22 | 3            | 2.9741          | 2.982    | 0.227 | 3.24872                     | 3.241(6) | 0.223(5) | 0.00761                              | 3                  |
| 117      | O H   | 6  | 29 | 3            | 3.0042          | 3.023    | 0.239 | 3.03748                     | 3.038(6) | 0.235(3) | 0.01924                              | 2                  |
| 118      | H H   | 16 | 19 | 3            | 3.0418          | 3.057    | 0.125 | 2.97445                     | 2.984(6) | 0.121(3) | 0.01487                              | 2                  |
| 119      | Si H  | 1  | 24 | 3            | 3.0509          | 3.072    | 0.178 | 3.19484                     | 3.206(6) | 0.173(5) | 0.02084                              | 3                  |
| 120      | Si C  | 1  | 10 | 3            | 3.055           | 3.075    | 0.103 | 3.11283                     | 3.129(6) | 0.099(5) | 0.01966                              | 3                  |
| 121      | C H   | 10 | 22 | 2            | 3.071           | 3.078    | 0.14  | 3.19933                     | 3.200(6) | 0.135(5) | 0.00687                              | 3                  |
| 122      | C H   | 12 | 26 | 1            | 3.0714          | 3.078    | 0.14  | 3.20832                     | 3.209(6) | 0.135(5) | 0.00645                              | 3                  |
| 123      | C C   | 11 | 14 | 3            | 3.1089          | 3.116    | 0.105 | 3.23112                     | 3.235(6) | 0.100(5) | 0.00678                              | 3                  |
| 124      | O H   | 8  | 20 | 3            | 3.1497          | 3.18     | 0.323 | 3.32916                     | 3.329(7) | 0.319(5) | 0.03064                              | 3                  |
| 125      | N H   | 2  | 21 | 3            | 3.3399          | 3.35     | 0.099 | 3.24543                     | 3.253(6) | 0.094(5) | 0.0101                               | 3                  |
| 126      | O H   | 7  | 22 | 3            | 3.3435          | 3.359    | 0.1   | 3.35539                     | 3.369(7) | 0.095(5) | 0.01584                              | 3                  |
| 127      | C H   | 10 | 27 | 3            | 3.3574          | 3.364    | 0.103 | 3.43859                     | 3.442(7) | 0.098(5) | 0.00622                              | 3                  |
| 128      | O C   | 8  | 11 | 3            | 3.3539          | 3.37     | 0.176 | 3.37678                     | 3.385(7) | 0.171(5) | 0.01647                              | 3                  |
| 129      | Si H  | 1  | 19 | 3            | 3.4153          | 3.447    | 0.192 | 3.59341                     | 3.615(7) | 0.188(5) | 0.03128                              | 3                  |
| 130      | O H   | 6  | 23 | 2            | 3.4482          | 3.479    | 0.231 | 3.66038                     | 3.678(7) | 0.226(5) | 0.03119                              | 3                  |

|     |      |    |    |   |        |       |       |         |           |           |         |   |
|-----|------|----|----|---|--------|-------|-------|---------|-----------|-----------|---------|---|
| 131 | O H  | 7  | 27 | 1 | 3.4488 | 3.479 | 0.231 | 3.67403 | 3.691(7)  | 0.226(5)  | 0.0306  | 3 |
| 132 | O C  | 8  | 10 | 3 | 3.4976 | 3.516 | 0.113 | 3.5422  | 3.557(7)  | 0.108(5)  | 0.01858 | 3 |
| 133 | H H  | 19 | 23 | 3 | 3.536  | 3.547 | 0.155 | 3.66165 | 3.667(7)  | 0.150(5)  | 0.01118 | 3 |
| 134 | C H  | 9  | 24 | 3 | 3.5915 | 3.61  | 0.256 | 3.75767 | 3.759(7)  | 0.251(5)  | 0.01823 | 3 |
| 135 | Si H | 1  | 21 | 3 | 3.5947 | 3.62  | 0.1   | 3.57845 | 3.601(7)  | 0.096(5)  | 0.02523 | 3 |
| 136 | C C  | 10 | 11 | 1 | 3.6192 | 3.624 | 0.076 | 3.63329 | 3.636(7)  | 0.071(5)  | 0.00432 | 3 |
| 137 | C C  | 9  | 14 | 2 | 3.6196 | 3.623 | 0.076 | 3.63369 | 3.636(7)  | 0.071(5)  | 0.0039  | 3 |
| 138 | O C  | 8  | 12 | 3 | 3.6118 | 3.625 | 0.107 | 3.59873 | 3.609(7)  | 0.103(5)  | 0.01309 | 3 |
| 139 | O H  | 8  | 29 | 3 | 3.6756 | 3.713 | 0.117 | 3.69023 | 3.724(7)  | 0.112(5)  | 0.03695 | 3 |
| 140 | H H  | 17 | 23 | 3 | 3.7083 | 3.719 | 0.213 | 3.9916  | 3.991(8)  | 0.216(11) | 0.01068 | 4 |
| 141 | O C  | 6  | 11 | 3 | 3.7428 | 3.76  | 0.086 | 3.73607 | 3.751(7)  | 0.081(5)  | 0.01709 | 3 |
| 142 | H H  | 16 | 22 | 3 | 3.8267 | 3.854 | 0.234 | 4.03538 | 4.050(8)  | 0.229(5)  | 0.0274  | 3 |
| 143 | H H  | 18 | 27 | 3 | 3.8432 | 3.854 | 0.166 | 4.01793 | 4.022(8)  | 0.169(11) | 0.0113  | 4 |
| 144 | C C  | 11 | 13 | 3 | 3.8555 | 3.868 | 0.123 | 3.91396 | 3.922(8)  | 0.118(5)  | 0.012   | 3 |
| 145 | C H  | 9  | 22 | 3 | 3.9963 | 4.017 | 0.153 | 4.14686 | 4.162(8)  | 0.156(11) | 0.0206  | 4 |
| 146 | H H  | 20 | 25 | 3 | 4.0418 | 4.067 | 0.298 | 3.97804 | 3.981(8)  | 0.293(5)  | 0.02488 | 3 |
| 147 | C H  | 11 | 18 | 3 | 4.0583 | 4.068 | 0.148 | 4.18438 | 4.189(8)  | 0.151(11) | 0.00986 | 4 |
| 148 | Si H | 1  | 22 | 3 | 4.0377 | 4.068 | 0.127 | 4.1387  | 4.165(8)  | 0.130(11) | 0.03071 | 4 |
| 149 | C C  | 13 | 15 | 3 | 4.0554 | 4.076 | 0.1   | 4.07833 | 4.097(8)  | 0.103(11) | 0.0211  | 4 |
| 150 | C H  | 14 | 21 | 3 | 4.1208 | 4.136 | 0.131 | 4.19237 | 4.203(8)  | 0.134(11) | 0.01507 | 4 |
| 151 | C H  | 14 | 16 | 3 | 4.1553 | 4.167 | 0.147 | 4.26582 | 4.273(9)  | 0.150(11) | 0.01218 | 4 |
| 152 | C H  | 11 | 30 | 2 | 4.1979 | 4.219 | 0.242 | 4.23754 | 4.244(8)  | 0.245(11) | 0.02102 | 4 |
| 153 | C H  | 9  | 29 | 1 | 4.1988 | 4.219 | 0.242 | 4.23205 | 4.238(8)  | 0.245(11) | 0.02012 | 4 |
| 154 | H H  | 24 | 28 | 3 | 4.2351 | 4.244 | 0.304 | 4.36288 | 4.350(9)  | 0.307(11) | 0.00849 | 4 |
| 155 | N C  | 2  | 15 | 1 | 4.2504 | 4.276 | 0.152 | 4.32565 | 4.346(9)  | 0.155(11) | 0.02591 | 4 |
| 156 | C H  | 13 | 30 | 3 | 4.2747 | 4.305 | 0.242 | 4.30631 | 4.323(9)  | 0.245(11) | 0.03041 | 4 |
| 157 | O H  | 8  | 22 | 3 | 4.3024 | 4.326 | 0.165 | 4.37699 | 4.394(9)  | 0.168(11) | 0.02372 | 4 |
| 158 | C H  | 15 | 24 | 3 | 4.3104 | 4.336 | 0.197 | 4.43371 | 4.450(9)  | 0.200(11) | 0.02539 | 4 |
| 159 | O H  | 8  | 23 | 3 | 4.3294 | 4.355 | 0.14  | 4.41407 | 4.435(9)  | 0.143(11) | 0.02541 | 4 |
| 160 | O H  | 6  | 20 | 3 | 4.3483 | 4.375 | 0.168 | 4.44119 | 4.461(9)  | 0.171(11) | 0.02636 | 4 |
| 161 | O H  | 8  | 21 | 3 | 4.3895 | 4.42  | 0.196 | 4.42872 | 4.450(9)  | 0.199(11) | 0.03001 | 4 |
| 162 | C H  | 11 | 19 | 3 | 4.416  | 4.431 | 0.113 | 4.52489 | 4.537(9)  | 0.116(11) | 0.01463 | 4 |
| 163 | C H  | 10 | 21 | 3 | 4.4287 | 4.442 | 0.126 | 4.22202 | 4.232(8)  | 0.129(11) | 0.01362 | 4 |
| 164 | O H  | 6  | 22 | 3 | 4.5028 | 4.534 | 0.137 | 4.59047 | 4.617(9)  | 0.140(11) | 0.03129 | 4 |
| 165 | H H  | 16 | 24 | 3 | 4.5198 | 4.551 | 0.264 | 4.73679 | 4.753(9)  | 0.267(11) | 0.03112 | 4 |
| 166 | O H  | 6  | 21 | 3 | 4.5283 | 4.562 | 0.147 | 4.37544 | 4.404(9)  | 0.150(11) | 0.03346 | 4 |
| 167 | C H  | 11 | 25 | 3 | 4.5383 | 4.563 | 0.178 | 4.3833  | 4.400(9)  | 0.181(11) | 0.02451 | 4 |
| 168 | C H  | 11 | 24 | 3 | 4.6069 | 4.63  | 0.166 | 4.74024 | 4.757(9)  | 0.169(11) | 0.0229  | 4 |
| 169 | H H  | 16 | 26 | 3 | 4.6471 | 4.666 | 0.178 | 4.84745 | 4.860(10) | 0.181(11) | 0.01915 | 4 |
| 170 | H H  | 18 | 21 | 3 | 4.7035 | 4.719 | 0.201 | 4.57792 | 4.584(9)  | 0.204(11) | 0.01518 | 4 |
| 171 | C H  | 15 | 25 | 3 | 4.7079 | 4.743 | 0.145 | 4.74122 | 4.771(9)  | 0.148(11) | 0.03486 | 4 |
| 172 | H H  | 24 | 30 | 3 | 4.7104 | 4.757 | 0.278 | 4.82079 | 4.851(10) | 0.281(11) | 0.04656 | 4 |
| 173 | H H  | 25 | 30 | 3 | 4.7272 | 4.765 | 0.3   | 4.7495  | 4.768(9)  | 0.303(11) | 0.03741 | 4 |
| 174 | N H  | 2  | 30 | 3 | 4.7368 | 4.773 | 0.204 | 4.81835 | 4.845(10) | 0.207(11) | 0.03571 | 4 |
| 175 | H H  | 23 | 24 | 3 | 4.7744 | 4.794 | 0.195 | 5.01341 | 5.025(10) | 0.198(11) | 0.01926 | 4 |
| 176 | C C  | 10 | 15 | 3 | 4.773  | 4.798 | 0.116 | 4.82085 | 4.843(10) | 0.119(11) | 0.02549 | 4 |
| 177 | H H  | 21 | 30 | 3 | 4.7971 | 4.834 | 0.297 | 4.92032 | 4.939(10) | 0.300(11) | 0.03689 | 4 |
| 178 | H H  | 17 | 22 | 3 | 4.9308 | 4.958 | 0.179 | 5.01971 | 5.040(10) | 0.182(11) | 0.02715 | 4 |
| 179 | C H  | 13 | 21 | 3 | 4.9345 | 4.959 | 0.147 | 4.97801 | 4.998(10) | 0.150(11) | 0.02486 | 4 |
| 180 | C H  | 13 | 29 | 3 | 4.9464 | 4.999 | 0.123 | 4.97911 | 5.028(10) | 0.126(11) | 0.05242 | 4 |
| 181 | C H  | 15 | 19 | 3 | 5.0243 | 5.063 | 0.221 | 5.1971  | 5.226(10) | 0.224(11) | 0.03822 | 4 |
| 182 | C H  | 14 | 30 | 3 | 5.0466 | 5.076 | 0.22  | 5.11408 | 5.134(10) | 0.223(11) | 0.02986 | 4 |
| 183 | H H  | 27 | 30 | 2 | 5.1044 | 5.136 | 0.308 | 5.29502 | 5.308(11) | 0.311(11) | 0.03179 | 4 |
| 184 | H H  | 23 | 29 | 1 | 5.1073 | 5.136 | 0.308 | 5.29791 | 5.308(11) | 0.311(11) | 0.02888 | 4 |
| 185 | C H  | 12 | 30 | 3 | 5.1533 | 5.185 | 0.201 | 5.19512 | 5.219(10) | 0.204(11) | 0.03176 | 4 |
| 186 | H H  | 24 | 29 | 3 | 5.1683 | 5.227 | 0.24  | 5.31116 | 5.358(11) | 0.243(11) | 0.05834 | 4 |
| 187 | H H  | 19 | 21 | 3 | 5.3229 | 5.349 | 0.138 | 5.2178  | 5.240(10) | 0.141(11) | 0.02643 | 4 |
| 188 | C H  | 10 | 30 | 3 | 5.4829 | 5.531 | 0.16  | 5.54075 | 5.586(11) | 0.128(80) | 0.04843 | 5 |
| 189 | H H  | 19 | 29 | 2 | 5.547  | 5.599 | 0.261 | 5.68518 | 5.728(11) | 0.230(80) | 0.05209 | 5 |
| 190 | H H  | 27 | 28 | 1 | 5.5436 | 5.599 | 0.261 | 5.68168 | 5.728(11) | 0.230(80) | 0.0555  | 5 |
| 191 | H H  | 21 | 25 | 3 | 5.5872 | 5.626 | 0.212 | 5.45576 | 5.488(11) | 0.180(80) | 0.03847 | 5 |
| 192 | H H  | 21 | 24 | 3 | 5.6798 | 5.716 | 0.178 | 5.75462 | 5.787(12) | 0.146(80) | 0.03605 | 5 |
| 193 | H H  | 25 | 29 | 3 | 5.6687 | 5.743 | 0.154 | 5.69105 | 5.763(11) | 0.123(80) | 0.07454 | 5 |
| 194 | H H  | 19 | 30 | 3 | 5.7196 | 5.783 | 0.265 | 5.9177  | 5.972(12) | 0.233(80) | 0.06345 | 5 |
| 195 | C H  | 15 | 22 | 2 | 5.767  | 5.805 | 0.133 | 5.83885 | 5.875(12) | 0.101(80) | 0.03803 | 5 |
| 196 | C H  | 15 | 18 | 1 | 5.7669 | 5.805 | 0.133 | 5.83866 | 5.875(12) | 0.101(80) | 0.03819 | 5 |
| 197 | H H  | 22 | 30 | 3 | 6.061  | 6.101 | 0.225 | 6.12382 | 6.158(12) | 0.194(80) | 0.03981 | 5 |

|     |     |    |    |   |        |       |       |         |           |           |         |   |
|-----|-----|----|----|---|--------|-------|-------|---------|-----------|-----------|---------|---|
| 198 | H H | 26 | 30 | 3 | 6.0857 | 6.132 | 0.228 | 6.15459 | 6.194(12) | 0.197(80) | 0.04592 | 5 |
| 199 | H H | 18 | 30 | 3 | 6.4703 | 6.533 | 0.174 | 6.56658 | 6.626(13) | 0.142(80) | 0.06272 | 5 |

<sup>[a]</sup>  $r_{hl}$  values ( $r_{hl}=r_a+\Delta r$ ) are given for GED results. The vibrational corrections  $\Delta r$  were calculated by the Vibmodule program (Vishnevskiy et al, *J. Phys.: Conf. Ser.*, 2015, **633**, 012076) using the so called second approximation, in which harmonic approach with nonlinear relation between Cartesian and internal coordinates were applied on the base of the force field estimated in the quantum chemical calculations at MP2/6-311G\*\* level.

<sup>[b]</sup> Values in parentheses for the GED data are full errors estimated as  $\sigma(r_{hl})=[\sigma_{scale}^2+(2.5\sigma_{LS})^2]^{1/2}$ , where  $\sigma_{scale}=0.002r$  and  $\sigma_{LS}$  is a standard deviation in least-squares refinement for internuclear distances and as  $3\sigma_{LS}$  for vibration amplitudes. The place-value is such that the last digit of the uncertainty lines up with the last digit of the nominal value.

<sup>[c]</sup> All amplitudes were refined being united in 5 groups. The differences between the amplitudes within each group were constrained to the calculated values.

Atomic coordinates of the refined structure of 1-methylsilatrane (for the C<sub>3</sub> conformer) based on the MP2/6-311G\*\* calculations

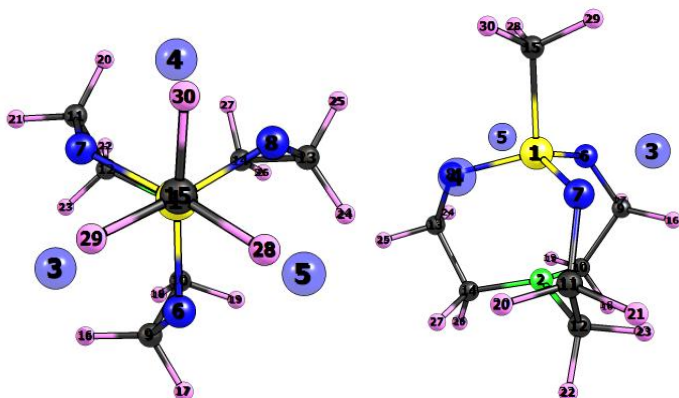

| Atom # | Nucleus charge | X       | Y       | Z       |
|--------|----------------|---------|---------|---------|
| 1.     | 14             | 0.      | 0.      | 0.      |
| 2.     | 7              | 0.      | 0.      | 2.4978  |
| 3.     | 0              | 2.      | 0.      | 0.      |
| 4.     | 0              | -0.9918 | 1.7367  | 0.      |
| 5.     | 0              | -0.9918 | -1.7367 | 0.      |
| 6.     | 8              | 0.7745  | -1.4282 | 0.3787  |
| 7.     | 8              | 0.8561  | 1.3808  | 0.3787  |
| 8.     | 8              | -1.6243 | 0.0357  | 0.3787  |
| 9.     | 6              | 1.475   | -1.7104 | 1.5698  |
| 10.    | 6              | 0.6423  | -1.3006 | 2.7728  |
| 11.    | 6              | 0.7537  | 2.129   | 1.5698  |
| 12.    | 6              | 0.8108  | 1.2028  | 2.7728  |
| 13.    | 6              | -2.2167 | -0.4326 | 1.5698  |
| 14.    | 6              | -1.4479 | 0.0872  | 2.7728  |
| 15.    | 6              | 0.      | 0.      | -1.8483 |
| 16.    | 1              | 2.4632  | -1.2178 | 1.6522  |
| 17.    | 1              | 1.4621  | -2.8015 | 1.7268  |
| 18.    | 1              | 1.2016  | -1.4377 | 3.72    |
| 19.    | 1              | -0.08   | -2.1183 | 2.9281  |
| 20.    | 1              | -0.164  | 2.7429  | 1.6522  |
| 21.    | 1              | 1.7077  | 2.659   | 1.7268  |
| 22.    | 1              | 0.6526  | 1.7564  | 3.72    |
| 23.    | 1              | 1.8792  | 0.981   | 2.9281  |
| 24.    | 1              | -2.279  | -1.535  | 1.6522  |
| 25.    | 1              | -3.1579 | 0.1197  | 1.7268  |
| 26.    | 1              | -1.8444 | -0.3304 | 3.72    |
| 27.    | 1              | -1.7998 | 1.12    | 2.9281  |
| 28.    | 1              | -0.4235 | -0.9396 | -2.2365 |
| 29.    | 1              | 1.0259  | 0.0983  | -2.2365 |
| 30.    | 1              | -0.6059 | 0.8337  | -2.2365 |

**Table S3.** Theoretical (QC) and experimental (GED) geometric parameters of 1-methylsilatrane (Å and degrees).

| Parameter              | QC <sup>a</sup>     |                    |                  |                       |                       | GED <sup>b</sup>                    |                                     |
|------------------------|---------------------|--------------------|------------------|-----------------------|-----------------------|-------------------------------------|-------------------------------------|
|                        | M06-2X <sup>a</sup> | B3LYP <sup>a</sup> | MP2 <sup>a</sup> | CAMB3LYP <sup>c</sup> | B3LYP-D3 <sup>c</sup> | MP2 <sup>d</sup>                    | B3LYP <sup>d</sup>                  |
| Internuclear distances |                     |                    |                  |                       |                       |                                     |                                     |
| Si ⋯ N                 | 2.695               | 2.689              | 2.419            | 2.712                 | 2.775                 | 2.498(13)                           | 2.514(17)                           |
| Si – O                 | 1.661               | 1.671              | 1.682            | 1.655                 | 1.661                 | 1.668(4)                            | 1.667(4)                            |
| O – C                  | 1.409               | 1.416              | 1.409            | 1.406                 | 1.415                 | 1.410(4)                            | 1.420(7)                            |
| C – C                  | 1.530               | 1.536              | 1.529            | 1.525                 | 1.532                 | 1.519(5)                            | 1.527(7)                            |
| N – C                  | 1.448               | 1.454              | 1.458            | 1.442                 | 1.446                 | 1.476(5 <sup>e</sup> ) <sup>f</sup> | 1.459(9 <sup>e</sup> ) <sup>f</sup> |
| Si – C                 | 1.847               | 1.858              | 1.858            | 1.849                 | 1.856                 | 1.848(7)                            | 1.847(8)                            |
| Bond angles            |                     |                    |                  |                       |                       |                                     |                                     |
| Si ⋯ N – C             | 97.0                | 97.2               | 102.1            | 96.2                  | 95.0                  | 100.7 <sup>f</sup>                  | 102.9 <sup>f</sup>                  |
| N – C – C              | 109.0               | 109.8              | 106.6            | 110.1                 | 110.6                 | 109.2 <sup>f</sup>                  | 105.3 <sup>f</sup>                  |
| C – C – O              | 110.1               | 110.9              | 109.2            | 110.9                 | 111.2                 | 110.0(6)                            | 114.2(7)                            |
| C – O – Si             | 124.1               | 125.5              | 123.0            | 125.5                 | 124.8                 | 126.4(5)                            | 125.0(6)                            |
| O – Si ⋯ N             | 73.7                | 74.5               | 78.2             | 73.9                  | 73.5                  | 76.9(2)                             | 76.9(6)                             |
| O – Si – C             | 106.3               | 105.5              | 101.8            | 106.1                 | 106.5                 | 103.1(2)                            | 103.1(6)                            |
| O – Si – O             | 97.0                | 97.2               | 102.1            | 96.2                  | 95.0                  | 115.5 <sup>f</sup>                  | 115.0 <sup>f</sup>                  |
| Torsion angles         |                     |                    |                  |                       |                       |                                     |                                     |
| C-O-Si⋯N               | -33.3               | -29.1              | -24.3            | -30.5                 | -31.9                 | -25.1(16)                           | -19.6(19)                           |
| C-C-O-Si               | 61.8                | 55.9               | 49.9             | 58.0                  | 60.4                  | 47.7(18)                            | 44.2(27)                            |
| O-Si⋯N-C               | 1.2                 | -1.3               | -5.5             | -0.6                  | 0.5                   | -2.2 <sup>f</sup>                   | -6.4 <sup>f</sup>                   |
| H-C-Si-O               | 51.8                | 51.9               | 52.8             | 51.5                  | 50.8                  | 62(36)                              | 34(26)                              |
| Flap <sup>g</sup>      | 47.1                | 43.5               | 40.2             | 45.0                  | 47.1                  | 37.0 <sup>f</sup>                   | 41.5 <sup>f</sup>                   |
| R-factor               |                     |                    |                  |                       |                       | 4.2%                                | 4.0%                                |

<sup>[a]</sup> QC calculations with 6-311G(d,p) basis set.

<sup>[b]</sup>  $r_{hl}$  values ( $r_{hl}=r_a+\Delta r$ ) are given for GED results. The vibrational corrections  $\Delta r$  were calculated by the Vibmodule program (Vishnevskiy et al, *J. Phys.: Conf. Ser.*, 2015, **633**, 012076) using the so called second approximation, in which harmonic approach with nonlinear relation between Cartesian and internal coordinates were applied on the base of the force field estimated in the specified QC calculations. Values in parentheses are full errors estimated as  $\sigma(r_{hl})=[\sigma_{scale}^2+(2.5\sigma_{LS})^2]^{1/2}$ , where  $\sigma_{scale}=0.002r$  and  $\sigma_{LS}$  is a standard deviation in least-squares refinement for internuclear distances and as  $3\sigma_{LS}$  for angles. The place-value is such that the last digit of the uncertainty lines up with the last digit of the nominal value.

<sup>[c]</sup> QC calculations with cc-pVTZ basis set

<sup>[d]</sup> Starting model for GED was taken from the corresponding method.

<sup>[e]</sup> Estimated uncertainty

<sup>[f]</sup> Dependent parameter.

<sup>[g]</sup> Flap angle of the OCC fragment relative to the NSi⋯O plane.

**Table S4.** GED and DFT values of  $d_{\text{SiN}}$  and MAE for silatranes  $\text{XSi}(\text{OCH}_2\text{CH}_2)_3\text{N}$ , **1**.

|                             | <b>X = Me</b>        |      | <b>X = H</b>         |      | <b>X = F</b>         |      |        |
|-----------------------------|----------------------|------|----------------------|------|----------------------|------|--------|
| <b>Method</b>               | $d_{\text{SiN}}$ , Å | ref. | $d_{\text{SiN}}$ , Å | ref. | $d_{\text{SiN}}$ , Å | ref. | MAE, Å |
| GED                         | 2.514(17)            | -    | 2.406(27)            | [1a] | 2.324(14)            | [1b] |        |
| B3LYP/6-311G(d,p)           | 2.689                | -    | 2.549                | -    | 2.433                | -    | 0.14   |
| B3LYP/6-311+G(d,p)          | 2.711                | -    | 2.563                | [2]  | 2.427                | [2]  | 0.15   |
| B3LYP/6-311++G(d,p)         | 2.703                | [1a] | 2.542                | [1a] | 2.403                | [1a] | 0.14   |
| B3LYP/def2-TZVPP            | 2.738                | -    | 2.570                | -    | 2.449                | -    | 0.17   |
| B3LYP/cc-pVTZ               | 2.719                | -    | 2.567                | -    | 2.424                | -    | 0.16   |
| B3LYP/aug-cc-pVTZ           | 2.719                | -    | 2.545                | -    | 2.405                | -    | 0.14   |
| B3LYP-D3/6-311G(d,p)        | 2.728                | -    | 2.591                | -    | 2.468                | -    | 0.18   |
| B3LYP-D3/cc-pVTZ            | 2.775                | -    | 2.618                | -    | 2.464                | -    | 0.20   |
| B3LYP-D3/aug-cc-pVTZ        | 2.770                | -    | 2.606                | -    | 2.446                | -    | 0.19   |
| B3LYP-D3(BJ)/6-311G(d,p)    | 2.657                | -    | 2.521                | -    | 2.405                | -    | 0.11   |
| B3LYP-D3(BJ)/cc-pVTZ        | 2.696                | -    | 2.536                | -    | 2.394                | -    | 0.13   |
| B3LYP-D3(BJ)/aug-cc-pVTZ    | 2.688                | -    | 2.526                | -    | 2.380                | -    | 0.12   |
| CAM-B3LYP/6-311G(d,p)       | 2.677                | -    | 2.549                | -    | 2.409                | -    | 0.13   |
| CAM-B3LYP/cc-pVTZ           | 2.712                | -    | 2.556                | -    | 2.389                | -    | 0.14   |
| M06-2X/6-311G(d,p)          | 2.700                | [3]  | 2.535                | [3]  | 2.352                | [3]  | 0.11   |
| M06-2X/ aug-cc-pVTZ         | 2.755                | -    | 2.562                | -    | 2.340                | -    | 0.14   |
| B3PW91/6-311G(d,p)          | 2.533                | [3]  | 2.400                | [3]  | 2.321                | [3]  | 0.01   |
| B3PW91/6-311++G(d,p)        | 2.558                | [3]  | 2.405                | [3]  | 2.304                | [3]  | 0.02   |
| B3PW91/ aug-cc-pVTZ         | 2.558                | -    | 2.377                | -    | 2.294                | -    | 0.03   |
| B3PW91-D3/6-311G(d,p)       | 2.585                | -    | 2.437                | -    | 2.347                | -    | 0.04   |
| B3PW91-D3/aug-cc-pVTZ       | 2.613                | -    | 2.421                | -    | 2.320                | -    | 0.04   |
| B3PW91-D3(BJ)/6-311G(d,p)   | 2.508                | -    | 2.378                | -    | 2.302                | -    | 0.02   |
| B3PW91-D3(BJ)/aug-cc-pVTZ   | 2.519                | -    | 2.353                | -    | 2.274                | -    | 0.04   |
| PBE/TZ2P                    | 2.400                | [4]  | 2.301                | [4]  | 2.244                | [4]  | 0.10   |
| PBE0/6-311G(d,p)            | 2.502                | [3]  | 2.371                | [3]  | 2.293                | [3]  | 0.03   |
| PBE0/6-311++G(d,p)          | 2.520                | [3]  | 2.376                | [3]  | 2.277                | [3]  | 0.03   |
| PBE0/ aug-cc-pVTZ           | 2.508                | -    | 2.343                | -    | 2.264                | -    | 0.04   |
| PBE0-D3(BJ)/ aug-cc-pVTZ    | 2.493                | -    | 2.333                | -    | 2.256                | -    | 0.05   |
| $\omega$ B97X/6-311G(d,p)   | 2.663                | [3]  | 2.511                | [3]  | 2.376                | [5]  | 0.10   |
| $\omega$ B97X-D/6-311G(d,p) | 2.597                | [3]  | 2.493                | [3]  | 2.372                | [5]  | 0.07   |
| PW6B95/6-311G(d,p)          | 2.549                | -    | 2.414                | -    | 2.313                | -    | 0.02   |
| PW6B95-D3(BJ)/6-311G(d,p)   | 2.544                | -    | 2.412                | -    | 2.311                | -    | 0.02   |

**References**

- [1] a) I. F. Shishkov, L. V. Khristenko, F. M. Rudakov, A. V. Golubinskii, L. V. Vilkov, S. S. Karlov, G. S. Zaitseva, S. Samdal, *Struct. Chem.* **2004**, *15*, 11-16; b) G. Forgacs, M. Kolonits, I. Hargittai, *Struct. Chem.* **1990**, *1*, 245-250.
- [2] A. A. Milov, R. M. Minayev, V. I. Minkin, *Russ. J. Org. Chem.*, **2003**, *39*, 340-347.
- [3] E. F. Belogolova, V. F. Sidorkin, *J. Phys. Chem. A* **2013**, *117*, 5365-5376.
- [4] S. S. Karlov, D. A. Tyurin, M. V. Zabalov, A. V. Churakov, G. S. Zaitseva, *J. Mol. Struct.: THEOCHEM* **2005**, *724*, 31-37.
- [5] V. F. Sidorkin, E. F. Belogolova, E. P. Doronina, *Phys. Chem. Chem. Phys.* **2015**, *17*, 26225-26237



**Table S5.** Different types the GED internuclear Si...N distances ( $d_{\text{SiN}}$ , Å) in **1** and **2**.

| Molecule  |                                                                        | Ref.      | $r_a(\text{Si}\cdots\text{N})$       | $r_g(\text{Si}\cdots\text{N})$          | $r_{\text{hl}}(\text{Si}\cdots\text{N})$ | $l$       | $\Delta r$<br>(vibration correction) |
|-----------|------------------------------------------------------------------------|-----------|--------------------------------------|-----------------------------------------|------------------------------------------|-----------|--------------------------------------|
| <b>1a</b> | <b>MeSi(OCH<sub>2</sub>CH<sub>2</sub>)<sub>3</sub>N</b>                | [1a]      | 2.448(47) <sup>a</sup>               | 2.453(47)                               | NA                                       | 0.115     | NA                                   |
|           |                                                                        | this work | 2.491(17)                            | 2.504(17)                               | 2.514(17)                                | 0.179(2)  | 0.022                                |
| <b>1b</b> | <b>HSi(OCH<sub>2</sub>CH<sub>2</sub>)<sub>3</sub>N</b>                 | [1c]      | 2.396(27)                            | 2.406(27)                               | NA                                       | 0.158(57) | NA                                   |
| <b>1c</b> | <b>FSi(OCH<sub>2</sub>CH<sub>2</sub>)<sub>3</sub>N</b>                 | [1b]      | 2.318(9)                             | 2.324(14)                               | NA                                       | 0.110(3)  | NA                                   |
| <b>2f</b> | <i>anti</i> - <b>ClH<sub>2</sub>SiONMe<sub>2</sub></b>                 | [2a]      | 2.160(7)                             | 2.164 <sup>a</sup><br>(17) <sup>b</sup> | NA                                       | 0.101(15) | NA                                   |
| <b>2e</b> | <i>gauche</i> - <b>ClH<sub>2</sub>SiONMe<sub>2</sub></b>               | [2a]      | 2.468(25)                            | 2.471 <sup>a</sup><br>(29) <sup>b</sup> | NA                                       | 0.092(14) | NA                                   |
| <b>2c</b> | <b>F<sub>3</sub>SiN(Me)NMe<sub>2</sub></b>                             | [2b]      | 2.510(6)                             | 2.512 <sup>a</sup> (6) <sup>c</sup>     | NA                                       | 0.064     | NA                                   |
| <b>2d</b> | <b>F<sub>3</sub>SiN(SiMe<sub>3</sub>)NMe<sub>2</sub></b>               | [2b]      | 2.135(9)                             | 2.140 <sup>a</sup><br>(11) <sup>b</sup> | NA                                       | 0.107(5)  | NA                                   |
| <b>2b</b> | <b>F<sub>3</sub>SiNCH<sub>2</sub>NMe<sub>2</sub></b>                   | [2c]      | 2.731(18) <sup>d</sup>               |                                         |                                          |           |                                      |
| <b>2h</b> | <i>anti</i> - <b>(F<sub>3</sub>C)F<sub>2</sub>SiONMe<sub>2</sub></b>   | [2d]      | 2.127 <sup>e</sup>                   | 2.134 <sup>a</sup>                      | 2.112                                    | 0.121(9)  | -0.015                               |
| <b>2j</b> | <i>gauche</i> - <b>(F<sub>3</sub>C)F<sub>2</sub>SiONMe<sub>2</sub></b> | [2d]      | 2.189 <sup>e</sup>                   | 2.196 <sup>a</sup>                      | 2.174                                    |           |                                      |
| <b>2a</b> | <b>H<sub>3</sub>SiN(CH<sub>2</sub>)<sub>3</sub>NMe<sub>2</sub></b>     | [2e]      | 2.899 <sup>e</sup> (35) <sup>f</sup> | 2.913 <sup>a</sup> (36) <sup>b</sup>    | 2.912(35)                                | 0.205(6)  | 0.013                                |

Values and uncertainties calculated (estimated) in this work:

<sup>a</sup> – calculated from equation:  $r_g = r_a + \frac{l^2}{r_a}$

<sup>b</sup> – uncertainty estimated as a square root of a sum of squares of  $r_a$  and  $l$  uncertainties

<sup>c</sup> – uncertainty taken equal to that for  $r_a$

<sup>d</sup> – Value and uncertainty estimated on the base of those for  $r(\text{Si-C})$ ,  $r(\text{N-C})$  and  $\angle\text{Si-C-N}$  specified in [2c]

<sup>e</sup> – calculated from equation:  $r_a = r_{\text{hl}} - \Delta r$

<sup>f</sup> – uncertainty taken equal to that for  $r_{\text{hl}}$

#### References

- [1] a) Q. Shen, R. L. Hilderbrandt, *J. Mol. Struct.* **1980**, *64*, 257-262; b) G. Forgacs, M. Kolonits, I. Hargittai, *Struct. Chem.* **1990**, *1*, 245-250; c) I. F. Shishkov, L. V. Khristenko, F. M. Rudakov, A. V. Golubinskii, L. V. Vilkov, S. S. Karlov, G. S. Zaitseva, S. Samdal, *Struct. Chem.* **2004**, *15*, 11-16.
- [2] a) N. W. Mitzel, U. Losehand, *J. Am. Chem. Soc.* **1998**, *120*, 7320-7327; b) K. Vojinović, L. J. McLachlan, S. L. Hinchley, D. W. H. Rankin, N. W. Mitzel, *Chem. Eur. J.* **2004**, *10*, 3033-3042; c) N. W. Mitzel, K. Vojinović, T. Foerster, H. E. Robertson, K. B. Borisenko, D. W. H. Rankin, *Chem. Eur. J.* **2005**, *11*, 5114-5125; d) N. W. Mitzel, K. Vojinović, R. Fröhlich, T. Foerster, H. E. Robertson, K. B. Borisenko, D. W. H. Rankin, *J. Am. Chem. Soc.* **2005**, *127*, 13705-13713; e) M. Hagemann, R. J. F. Berger, S. A. Hayes, H.-G. Stammler, N. W. Mitzel, *Chem. Eur. J.* **2008**, *14*, 11027-11038.

## GED/MS

The diffraction patterns of 1-methylsilatrane were obtained in a synchronous gas-phase electron diffraction and mass-spectrometric experiment carried out using the *EMR-100/APDM-1* unit<sup>1,2</sup>. The samples were loaded in to molybdenum effusion cell filled by crushed pieces of Schott filter with a cylindrical nozzle of 0.6×1.2 mm<sup>2</sup> size (diameter × length) and were kept at 355(5) K in the course of the experiments. Diffraction patterns were recorded on MACO EM/EMS photographic films of 9×12 cm<sup>2</sup>.

Accurate wavelengths of the electrons were calibrated using polycrystalline ZnO. The two camera distances resulted in diffraction patterns in the s-range for **1** of 1.3 to 16.4 Å<sup>-1</sup> and 3.0 to 28.9 Å<sup>-1</sup> with a step size of 0.1 Å<sup>-1</sup>, where  $s=(4\pi/\lambda)\sin(\theta/2)$ ,  $\lambda$  is electron wavelength and  $\theta$  is scattering angle, respectively. The optical densities of the diffraction patterns were measured by a computer controlled MD-100 (Carl Zeiss, Jena) microdensitometer<sup>3</sup> with a step size of 0.1 mm. The molecular scattering function,  $sM(s)$ , was evaluated as  $sM(s)=(I(s)/G(s)-1)s$ , where  $I(s)$  is the total electron scattering intensity,  $G(s)$  the experimental background.

**Table S6.** Conditions of the synchronous GED/MS experiments

|                                                         | Camera distance     |                     |
|---------------------------------------------------------|---------------------|---------------------|
|                                                         | Long                | Short               |
| Nozzle-to-plate distance, mm                            | 598                 | 338                 |
| Number of recorded films                                | 6                   | 5                   |
| Primary electron beam current, $\mu\text{A}$            | 0.43                | 1.30                |
| Accelerating voltage <sup>a</sup> , kV                  | 81.81               | 82.54               |
| Temperature of effusion cell, K                         | 360                 | 350                 |
| Wavelength of electrons <sup>b</sup> , Å                | 0.041280            | 0.041082            |
| Exposure time, s                                        | 50                  | 65                  |
| Residual gas pressure, Torr, in<br>–diffraction chamber | $3.3 \cdot 10^{-6}$ | $1.9 \cdot 10^{-6}$ |
| –mass spectrometric block                               | $8.0 \cdot 10^{-7}$ | $7.4 \cdot 10^{-7}$ |
| Ionization voltage, V                                   | 50                  |                     |

<sup>a</sup> Approximate value

<sup>b</sup> Accurate wavelengths of electrons were calibrated using diffractions pattern of polycrystalline ZnO

**Table S7.** Mass-spectra of 1-methylsilatrane

| M, Da | Relative intensity, % |                   |
|-------|-----------------------|-------------------|
|       | Our data <sup>a</sup> | NIST <sup>4</sup> |
| 45    | 28                    | 10                |
| 61    | 21                    | 8                 |
| 77    | 19                    | 9                 |
| 91    | 13                    | 5                 |
| 100   | 23                    | 12                |
| 116   | 38                    | 26                |
| 130   | 15                    | 9                 |
| 146   | 100                   | 100               |
| 158   | 17                    | 22                |
| 174   | 56                    | 81                |
| 189   | 22                    | 26                |

<sup>a</sup> -  $U_{\text{ioniz}} = 50$ .

## References

1. Girichev G V., Utkin AN, Revichev YF. UPGRADING THE EMR-100 ELECTRON-DIFFRACTION CAMERA FOR USE WITH GASES. *Instruments Exp Tech New York*. 1984;27(2):457–461.
2. Giricheva NI, Girichev G V., Shlykov SA, Titov VA, Chusova TP. The joint gas electron diffraction and mass spectrometric study of GeI<sub>4</sub>(g) + Ge(s) system. Molecular structure of germanium diiodide. *J Mol Struct*. 1995;344(1–2):127–134. doi:10.1016/0022-2860(94)08408-A.
3. Girichev EG, Zakharov A V., Girichev G V., Bazanov MI. Automation of a physicochemical experiment: photometry and voltammetry. *Izv Vyss Uchebn Zaved, Tekhnol Tekst Prom*. 2000;(2):142–146.
4. <https://webbook.nist.gov/cgi/cbook.cgi?ID=C2288133&Units=SI&Mask=200#Mass-Spec>.

**Table S8.** Observed and Calculated (B3LYP and MP2 methods with 6-311G(d,p) basis set) Frequencies ( $\text{cm}^{-1}$ ) of 1-methylsilatrane molecule. A bold italics in red show data for a benzene solution.

| No.   | Sym. | Observed <sup>a</sup>          | Calculated                                        |                                                 | Assignment                                                                                                               |
|-------|------|--------------------------------|---------------------------------------------------|-------------------------------------------------|--------------------------------------------------------------------------------------------------------------------------|
|       |      | <i>cryst/melt<br/>solution</i> | B3LYP<br>gas phase<br><i>solution<br/>(C-PCM)</i> | MP2<br>gas phase<br><i>solution<br/>(C-PCM)</i> |                                                                                                                          |
| 1     | A    | <b>84</b>                      | 90<br><b>71</b>                                   | 83<br><b>86</b>                                 | $\nu(\text{Si}\leftarrow\text{N}) + \rho(\text{NC3})\text{-twist}^b + \text{ring-tors}$                                  |
| 2     | A    | -                              | 150<br><b>160</b>                                 | 171<br><b>177</b>                               | $\rho(\text{CH3})\text{-twist}$                                                                                          |
| 3,4   | E    | <b>130</b>                     | 152<br><b>151</b>                                 | 155<br><b>158</b>                               | $\delta(\text{SiO3})\text{-as-bend} + \text{ring-tors}$                                                                  |
| 5     | A    | <b>182</b>                     | 191<br><b>193</b>                                 | 219<br><b>238</b>                               | $\nu(\text{Si}\leftarrow\text{N}) + \delta(\text{SiO3})\text{-s-def-}\delta(\text{NC3})\text{-s-def} + \text{ring-tors}$ |
| 6,7   | E    | <b>242</b><br>170              | 198<br><b>202</b>                                 | 209<br><b>215</b>                               | $\delta(\text{SiO3})\text{-as-def} + \text{ring-def} + \text{ring-tors}$                                                 |
| 8,9   | E    | <b>264/222</b>                 | 265<br><b>271</b>                                 | 280<br><b>280</b>                               | $\delta(\text{SiO3})\text{-as-def} + \text{ring-def}$                                                                    |
| 10    | A    | <b>288/280</b><br><b>281</b>   | 289<br><b>287</b>                                 | 311<br><b>312</b>                               | $\nu(\text{Si}\leftarrow\text{N}) + \text{ring-tors}$                                                                    |
| 11,12 | E    | <b>354/355</b><br><b>355</b>   | 358<br><b>354</b>                                 | 365<br><b>361</b>                               | $\delta(\text{SiO3})\text{-as-def} + \text{ring-tors}$                                                                   |
| 13,14 | E    | <b>455/440</b>                 | 416<br><b>424</b>                                 | 437<br><b>448</b>                               | $\delta(\text{CNC}) + \text{ring-tors}^c + \text{ring-def}$                                                              |
| 15    | A    | <b>471/470</b><br><b>465</b>   | 439<br><b>453</b>                                 | 465<br><b>471</b>                               | $\delta(\text{SiO3})\text{-s-def} + \delta(\text{CNC}) + \delta(\text{OCC})$                                             |
| 16    | A    | -                              | 552<br><b>566</b>                                 | 575<br><b>578</b>                               | ring-def <sup>d</sup>                                                                                                    |
| 17,18 | E    | <b>580/580</b><br><b>576</b>   | 576<br><b>590</b>                                 | 596<br><b>609</b>                               | ring-def                                                                                                                 |
| 19    | A    | <b>619/606</b>                 | 598<br><b>590</b>                                 | 608<br><b>612</b>                               | $\nu(\text{SiC})\text{-stretch} + \nu(\text{SiO})\text{-stretch}$                                                        |
| 20,21 | E    | <b>718/708</b><br><b>712</b>   | 735<br><b>730</b>                                 | 747<br><b>742</b>                               | $\rho(\text{SiMe})\text{-rock} + \nu(\text{SiO})\text{-stretch}$                                                         |
| 22    | A    | <b>696</b>                     | 740<br><b>731</b>                                 | 753<br><b>738</b>                               | $\nu(\text{SiC})\text{-stretch} + \nu(\text{NC})\text{-stretch} + \nu(\text{SiO})$                                       |
| 23    | A    | <b>769/769</b><br><b>763</b>   | 777<br><b>768</b>                                 | 791<br><b>788</b>                               | $\nu(\text{SiC})\text{-stretch} - \nu(\text{NC})\text{-stretch} + \nu(\text{SiO})$                                       |
| 24,25 | E    | <b>818</b>                     | 855<br><b>846</b>                                 | 862<br><b>849</b>                               | $\rho(\text{SiMe})\text{-rock} - \nu(\text{SiO})\text{-stretch}$                                                         |
| 26    | A    | <b>881</b>                     | 886<br><b>895</b>                                 | 925<br><b>935</b>                               | $\delta(\text{NC3})\text{-s-def} + \nu(\text{CC})\text{-stretch} + \rho(\text{CH2})\text{-rock}$                         |
| 27,28 | E    | -                              | 888<br><b>887</b>                                 | 905<br><b>907</b>                               | $\nu(\text{SiO})\text{-stretch} + \nu(\text{CC})\text{-stretch} + \rho(\text{CH2})\text{-rock}$                          |
| 29,30 | E    | <b>908/906</b><br><b>902</b>   | 926<br><b>931</b>                                 | 959<br><b>964</b>                               | $\nu(\text{CC})\text{-stretch} + \nu(\text{CN}) + \rho(\text{CH2})\text{-rock}$                                          |
| 31    | A    | <b>944/944</b><br><b>934</b>   | 998<br><b>1005</b>                                | 1039<br><b>1049</b>                             | $\nu(\text{CC})\text{-stretch} + \nu(\text{CN})\text{-stretch} + \text{ring-def}$                                        |

|       |   |                                 |                     |                     |                                                                 |
|-------|---|---------------------------------|---------------------|---------------------|-----------------------------------------------------------------|
| 32,33 | E | <b>1016/1008</b>                | 1083<br><i>1075</i> | 1101<br><i>1095</i> | v(CN)-stretch + $\rho$ (CH <sub>2</sub> )-rock                  |
| 34    | A | <b>1050/1055</b><br><i>1055</i> | 1094<br><i>1094</i> | 1114<br><i>1117</i> | v(CH <sub>2</sub> )-rock                                        |
| 35,36 | E | <b>1084/1085</b><br><i>1082</i> | 1125<br><i>1114</i> | 1162<br><i>1151</i> | v(CO)-stretch + v(CN)-stretch                                   |
| 37    | A | <b>1113/1125</b>                | 1152<br><i>1137</i> | 1186<br><i>1172</i> | v(CO)-stretch                                                   |
| 38,39 | E | <b>1171/1175</b>                | 1207<br><i>1201</i> | 1223<br><i>1217</i> | $\rho$ (CH <sub>2</sub> )-rock + v(NC)-stretch                  |
| 40    | A | -                               | 1262<br><i>1261</i> | 1279<br><i>1279</i> | $\rho$ (CH <sub>2</sub> )-twist                                 |
| 41,42 | E | -                               | 1280<br><i>1277</i> | 1291<br><i>1288</i> | $\rho$ (CH <sub>2</sub> )-twist                                 |
| 43    | A | <b>1237</b>                     | 1289<br><i>1289</i> | 1304<br><i>1307</i> | $\rho$ (CH <sub>2</sub> )-twist                                 |
| 44    | A | -/1265                          | 1311<br><i>1305</i> | 1321<br><i>1312</i> | $\rho$ (SiMe <sub>3</sub> )-s-def-v(SiC)-stretch                |
| 45,46 | E | <b>1278/1280</b><br><i>1280</i> | 1329<br><i>1317</i> | 1333<br><i>1324</i> | $\rho$ (CH <sub>2</sub> )-twist + $\rho$ (CH <sub>2</sub> )-wag |
| 47,48 | E | <b>1350</b>                     | 1390<br><i>1389</i> | 1399<br><i>1397</i> | $\rho$ (CH <sub>2</sub> )-wag                                   |
| 49    | A | <b>1358/1358</b><br><i>1360</i> | 1392<br><i>1393</i> | 1402<br><i>1402</i> | $\rho$ (CH <sub>2</sub> )-wag                                   |
| 50    | A | -                               | 1405<br><i>1402</i> | 1420<br><i>1420</i> | $\rho$ (CH <sub>2</sub> )-wag                                   |
| 51,52 | E | <b>1381</b>                     | 1412<br><i>1411</i> | 1431<br><i>1431</i> | $\rho$ (CH <sub>2</sub> )-wag                                   |
| 53,54 | E | <b>1407</b><br><i>1402</i>      | 1465<br><i>1461</i> | 1476<br><i>1471</i> | $\rho$ (SiMe <sub>3</sub> )-as-def                              |
| 55,56 | E | <b>1452/1458</b><br><i>1450</i> | 1488<br><i>1490</i> | 1505<br><i>1506</i> | $\delta$ (CH <sub>2</sub> )-sciss                               |
| 57    | A | -                               | 1493<br><i>1494</i> | 1509<br><i>1509</i> | $\delta$ (CH <sub>2</sub> )-sciss                               |
| 58,59 | E | -                               | 1516<br><i>1514</i> | 1538<br><i>1539</i> | $\delta$ (CH <sub>2</sub> )-sciss                               |
| 60    | A | <b>1487/1485</b><br><i>1480</i> | 1517<br><i>1519</i> | 1540<br><i>1541</i> | $\delta$ (CH <sub>2</sub> )-sciss                               |
| 61,62 | E | -                               | 2963<br><i>2986</i> | 3045<br><i>3059</i> | v(CH <sub>2</sub> )-s-stretch                                   |
| 63    | A | -                               | 2968<br><i>2989</i> | 3045<br><i>3058</i> | v(CH <sub>2</sub> )-s-stretch                                   |
| 64,65 | E | <b>2875</b>                     | 3000<br><i>3003</i> | 3054<br><i>3067</i> | v(CH <sub>2</sub> )-s-stretch                                   |
| 66    | A | <b>2915</b>                     | 3038<br><i>3034</i> | 3085<br><i>3072</i> | v(SiMe <sub>3</sub> )-s-stretch                                 |
| 67    | A |                                 | 3003<br><i>3007</i> | 3058<br><i>3079</i> | v(CH <sub>2</sub> )-s-stretch                                   |
| 68,69 | E | <b>2927</b>                     | 3059<br><i>3066</i> | 3129<br><i>3134</i> | v(CH <sub>2</sub> )-as-stretch                                  |
| 70    | A | -                               | 3060                | 3130                | v(CH <sub>2</sub> )-as-stretch                                  |

|       |   |             |                     |                     |                                   |
|-------|---|-------------|---------------------|---------------------|-----------------------------------|
|       |   |             | <b>3067</b>         | <b>3135</b>         |                                   |
| 71    | A | -           | 3075<br><b>3084</b> | 3143<br><b>3153</b> | v(CH <sub>2</sub> )-as-stretch    |
| 72,73 | E | <b>2959</b> | 3080<br><b>3088</b> | 3149<br><b>3159</b> | vCH <sub>2</sub> )-as-stretch     |
| 74,75 | E | <b>2975</b> | 3112<br><b>3106</b> | 3183<br><b>3175</b> | v(SiMe <sub>3</sub> )-deg-stretch |

<sup>a</sup>Raman spectroscopy data for polycrystalline powders (cryst), a liquid state at 155° C (melt) and a solution in C<sub>6</sub>H<sub>6</sub> [M. Imbenotte, G. Palavit, P. Legrand, *J. Raman. Spectr.* **1983**, *14*, 135-137].

<sup>b</sup>RelativetoMeSiO<sub>3</sub>.

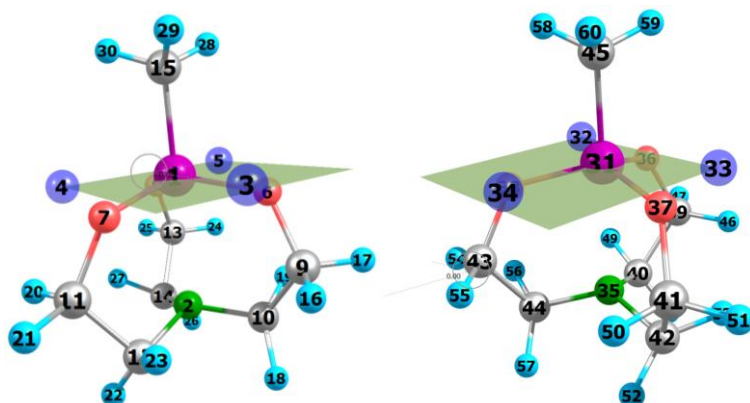

**Table S9.** Z- matrix for the KCED program input.

| N                         | N1 | P1     | J1 | K1  | N2 | P2     | J2 | K2 | N3 | P3     | J3 | K3 | Code |
|---------------------------|----|--------|----|-----|----|--------|----|----|----|--------|----|----|------|
| C <sub>3</sub> -conformer |    |        |    |     |    |        |    |    |    |        |    |    |      |
| 1                         |    | --     | -- | --  | -- | --     | -- | -- | -- | --     | -- | -- | --   |
| 2                         | 1  | 2.6893 | 1  | 0   |    | --     | -- | -- | -- | --     | -- | -- | --   |
| 3                         | 1  | 2      | 2  | 0   | 2  | 90     | 3  | 0  |    | --     | -- | -- | --   |
| 4                         | 1  | 2      | 2  | 0   | 2  | 90     | 3  | 0  | 3  | 120    | 31 | 0  | 1    |
| 5                         | 1  | 2      | 2  | 0   | 2  | 90     | 3  | 0  | 3  | 120    | 31 | 0  | -1   |
| 6                         | 1  | 1.6711 | 4  | 0   | 2  | 74.53  | 5  | 0  | 3  | 45     | 6  | 0  | 0    |
| 7                         | 1  | 1.6711 | 4  | 0   | 2  | 74.53  | 5  | 0  | 4  | 45     | 6  | 0  | 0    |
| 8                         | 1  | 1.6711 | 4  | 0   | 2  | 74.53  | 5  | 0  | 5  | 45     | 6  | 0  | 0    |
| 9                         | 6  | 1.4155 | 8  | 0   | 1  | 125.49 | 9  | 0  | 2  | -29.12 | 10 | 0  | 0    |
| 10                        | 9  | 1.5359 | 11 | 0   | 6  | 110.90 | 12 | 0  | 1  | 55.85  | 13 | 0  | 0    |
| 11                        | 7  | 1.4155 | 8  | 0   | 1  | 125.49 | 9  | 0  | 2  | -29.12 | 10 | 0  | 0    |
| 12                        | 11 | 1.5359 | 11 | 0   | 7  | 110.90 | 12 | 0  | 1  | 55.85  | 13 | 0  | 0    |
| 13                        | 8  | 1.4155 | 8  | 0   | 1  | 125.49 | 9  | 0  | 2  | -29.12 | 10 | 0  | 0    |
| 14                        | 13 | 1.5359 | 11 | 0   | 8  | 110.90 | 12 | 0  | 1  | 55.85  | 13 | 0  | 0    |
| 15                        | 1  | 1.8577 | 14 | 0   | 3  | 90     | 3  | 0  | 4  | 90     | 3  | 0  | -1   |
| 16                        | 9  | 1.0977 | 15 | 0   | 6  | 109.86 | 16 | 0  | 10 | 110.03 | 17 | 0  | 1    |
| 17                        | 9  | 1.0938 | 15 | -18 | 6  | 108.10 | 19 | 0  | 10 | 110.25 | 20 | 0  | -1   |
| 18                        | 10 | 1.1011 | 15 | 21  | 9  | 110.09 | 22 | 0  | 2  | 112.61 | 23 | 0  | 1    |
| 19                        | 10 | 1.0928 | 15 | -24 | 9  | 108.84 | 25 | 0  | 2  | 108.18 | 26 | 0  | -1   |
| 20                        | 11 | 1.0977 | 15 | 0   | 7  | 109.86 | 16 | 0  | 12 | 110.03 | 17 | 0  | 1    |
| 21                        | 11 | 1.0938 | 15 | -18 | 7  | 108.10 | 19 | 0  | 12 | 110.25 | 20 | 0  | -1   |
| 22                        | 12 | 1.1011 | 15 | 21  | 11 | 110.09 | 22 | 0  | 2  | 112.61 | 23 | 0  | 1    |
| 23                        | 12 | 1.0928 | 15 | -24 | 11 | 108.84 | 25 | 0  | 2  | 108.18 | 26 | 0  | -1   |
| 24                        | 13 | 1.0977 | 15 | 0   | 8  | 109.86 | 16 | 0  | 14 | 110.03 | 17 | 0  | 1    |

|                           |    |        |    |     |    |        |     |     |    |        |     |     |    |
|---------------------------|----|--------|----|-----|----|--------|-----|-----|----|--------|-----|-----|----|
| 25                        | 13 | 1.0938 | 15 | -18 | 8  | 108.10 | 19  | 0   | 14 | 110.25 | 20  | 0   | -1 |
| 26                        | 14 | 1.1011 | 15 | 21  | 13 | 110.09 | 22  | 0   | 2  | 112.61 | 23  | 0   | 1  |
| 27                        | 14 | 1.0928 | 15 | -24 | 13 | 108.84 | 25  | 0   | 2  | 108.18 | 26  | 0   | -1 |
| 28                        | 15 | 1.0926 | 15 | -27 | 1  | 110.70 | 28  | 0   | 6  | 51.93  | 29  | 0   | 0  |
| 29                        | 15 | 1.0926 | 15 | -27 | 1  | 110.70 | 28  | 0   | 7  | 51.93  | 29  | 0   | 0  |
| 30                        | 15 | 1.0926 | 15 | -27 | 1  | 110.70 | 28  | 0   | 8  | 51.93  | 29  | 0   | 0  |
| C <sub>1</sub> -conformer |    |        |    |     |    |        |     |     |    |        |     |     |    |
| 31                        | 1  | 10     | 32 | 0   | 3  | 120    | 31  | 0   | 4  | 120    | 31  | 0   | 1  |
| 32                        | 31 | 2      | 2  | 0   | 1  | 120    | 31  | 0   | 3  | 0      | 0   | 0   | 0  |
| 33                        | 31 | 2      | 2  | 0   | 1  | 120    | 31  | 0   | 32 | 120    | 31  | 0   | 1  |
| 34                        | 31 | 2      | 2  | 0   | 32 | 120    | -31 | 0   | 33 | 0      | 0   | 0   | 0  |
| 35                        | 31 | 2.6547 | 1  | 33  | 32 | 90     | 3   | 0   | 33 | 90     | 3   | 0   | 1  |
| 36                        | 31 | 1.6714 | 4  | 34  | 35 | 75.36  | 5   | 35  | 32 | 45     | 6   | 0   | 1  |
| 37                        | 31 | 1.6740 | 4  | 36  | 35 | 75.52  | 5   | 37  | 36 | 111.87 | 38  | 0   | 1  |
| 38                        | 31 | 1.6716 | 4  | 39  | 35 | 75.01  | 5   | 40  | 36 | 116.15 | 38  | 41  | -1 |
| 39                        | 36 | 1.4134 | 8  | 42  | 31 | 124.68 | 9   | -35 | 35 | -28.98 | 10  | 0   | 0  |
| 40                        | 39 | 1.5327 | 11 | 44  | 36 | 110.56 | 12  | 43  | 31 | 55.75  | 13  | 0   | 0  |
| 41                        | 37 | 1.4140 | 8  | 45  | 31 | 126.93 | 9   | 46  | 35 | -26.38 | 10  | 47  | 0  |
| 42                        | 41 | 1.5430 | 11 | 48  | 37 | 111.60 | 12  | 49  | 31 | 48.86  | 13  | 50  | 0  |
| 43                        | 38 | 1.4132 | 8  | 42  | 31 | 127.67 | 9   | 51  | 35 | 26.34  | -10 | -47 | 0  |
| 44                        | 43 | 1.5423 | 11 | 52  | 38 | 111.57 | 12  | 49  | 31 | -48.64 | -13 | -53 | 0  |
| 45                        | 31 | 1.8585 | 14 | 54  | 32 | 90     | 3   | 0   | 33 | 90     | 3   | 0   | -1 |
| 46                        | 39 | 1.0983 | 15 | 55  | 36 | 109.97 | 16  | 56  | 40 | 110.28 | 17  | 57  | 1  |
| 47                        | 39 | 1.0939 | 15 | -18 | 36 | 108.27 | 19  | -58 | 40 | 110.11 | 20  | 59  | -1 |
| 48                        | 40 | 1.1009 | 15 | -44 | 39 | 110.20 | 22  | 60  | 35 | 112.59 | 23  | 0   | 1  |
| 49                        | 40 | 1.0913 | 15 | -61 | 39 | 108.57 | 25  | 0   | 35 | 108.05 | 26  | 45  | -1 |
| 50                        | 41 | 1.0942 | 15 | 44  | 37 | 108.04 | 16  | -62 | 42 | 109.53 | 17  | 59  | 1  |
| 51                        | 41 | 1.0965 | 15 | -63 | 37 | 110.01 | 19  | 62  | 42 | 110.42 | 20  | 64  | -1 |
| 52                        | 42 | 1.0926 | 15 | -27 | 41 | 108.65 | 22  | 65  | 35 | 107.99 | 23  | 66  | 1  |
| 53                        | 42 | 1.1009 | 15 | -44 | 41 | 109.63 | 25  | 49  | 35 | 111.79 | 26  | 67  | -1 |
| 54                        | 43 | 1.0942 | 15 | 44  | 38 | 108.07 | 16  | -62 | 44 | 109.47 | 20  | 59  | 1  |
| 55                        | 43 | 1.0968 | 15 | -54 | 38 | 109.93 | 19  | 62  | 44 | 110.59 | 17  | 58  | -1 |
| 56                        | 44 | 1.1011 | 15 | -44 | 43 | 109.60 | 25  | 49  | 35 | 112.10 | 26  | 68  | 1  |
| 57                        | 44 | 1.0913 | 15 | -61 | 43 | 108.57 | 22  | 65  | 35 | 107.95 | 23  | 66  | -1 |
| 58                        | 45 | 1.0925 | 15 | -27 | 31 | 110.90 | 28  | -57 | 32 | 45     | 6   | 0   | 0  |
| 59                        | 45 | 1.0925 | 15 | -27 | 31 | 110.90 | 28  | -57 | 33 | 45     | 6   | 0   | 0  |
| 60                        | 45 | 1.0925 | 15 | -27 | 31 | 110.90 | 28  | -57 | 34 | 45     | 6   | 0   | 0  |

N(i) – atom number; P(i) – parameter value; J(i) – parameter number; K(i) – number of the correction for the parameter specified in the column J(i) was taken as a difference between two analogous parameters adopted from QC calculations; Codes mean: valence angle (1 or -1) and torsion angle (0); atoms 3-5 in C<sub>3</sub>-conformer and 32-34 in C<sub>3</sub>-conformer are dummies

**Table S10.** List<sup>a</sup> of independent starting parameters: distances r, valence A and dihedral D angles and differences, dr, dA and dD, between analogous parameters adopted from QC calculations B3LYP/6-311G\*\*

| #  | Parameter          | Value   | #  | Parameter | Value   |
|----|--------------------|---------|----|-----------|---------|
| 1  | rSiN               | 2.4493  | 35 | dA        | 0.82    |
| 2  | rXSi               | 2.      | 36 | dr        | 0.0029  |
| 3  | AXSiX              | 90.     | 37 | dA        | 0.98    |
| 4  | rOSi               | 1.6711  | 38 | A         | 111.87  |
| 5  | AOSiN              | 74.54   | 39 | dr        | 0.0005  |
| 6  | AOSiX              | 45.     | 40 | dA        | 0.47    |
| 7  | AOSiO <sup>b</sup> | 113.16  | 41 | dA        | 4.28    |
| 8  | rCO                | 1.4155  | 42 | dr        | -0.0021 |
| 9  | ACOSi              | 125.49  | 43 | dA        | -0.33   |
| 10 | DCOSiN             | -29.12  | 44 | dr        | -0.0032 |
| 11 | rCC                | 1.5359  | 45 | dr        | -0.0015 |
| 12 | ACCO               | 110.89  | 46 | dA        | 1.44    |
| 13 | DCCOSi             | 55.85   | 47 | dD        | 2.8     |
| 14 | rCSi               | 1.8577  | 48 | dr        | 0.0071  |
| 15 | rHC                | 1.0977  | 49 | dA        | 0.71    |
| 16 | AH1C1O             | 109.86  | 50 | dD        | -7.0    |
| 17 | AH1C1C2            | 110.03  | 51 | dA        | 2.18    |
| 18 | dr                 | 0.0039  | 52 | dr        | 0.0061  |
| 19 | AH2C1O             | 108.1   | 53 | dD        | -7.2    |
| 20 | AH2C1C2            | 110.25  | 54 | dr        | 0.0008  |
| 21 | dr                 | 0.0024  | 55 | dr        | 0.0006  |
| 22 | AH3C2C1            | 110.09  | 56 | dA        | -0.3    |
| 23 | AH3C2N             | 112.61  | 57 | dA        | 0.24    |
| 24 | dr                 | 0.0049  | 58 | dA        | 0.35    |
| 25 | AH4C2C1            | 108.84  | 59 | dA        | -0.5    |
| 26 | AH4C2N             | 108.18  | 60 | dA        | 1.98    |
| 27 | dr                 | 0.0051  | 61 | dr        | 0.0064  |
| 28 | A11                | 110.64  | 62 | dA        | 1.82    |
| 29 | D3                 | 51.93   | 63 | dr        | 0.0012  |
| 30 | A12                | 108.22  | 64 | dA        | 0.17    |
| 31 | A13                | 120     | 65 | dA        | -1.44   |
| 32 | rSiSi              | 10      | 66 | dA        | -4.6    |
| 33 | dr                 | -0.0346 | 67 | dA        | 3.61    |
| 34 | dr                 | 0.0003  | 68 | dA        | 3.81    |

<sup>[a]</sup> Initial values were taken from QC calculations and are specified. All geometric parameters, except the differences, were variables.

<sup>[b]</sup> parameter #7 was not used



Experimental total intensities and background for 1-methylsilatrane

**I(s) long camera s= 1.3 to 16.4 Å<sup>-1</sup>; step 0.1 Å<sup>-1</sup>; λ= 0.04128017 Å, sequence in rows**

|         |         |         |         |         |         |         |         |
|---------|---------|---------|---------|---------|---------|---------|---------|
| 1.03799 | 0.83911 | 0.69900 | 0.64521 | 0.59580 | 0.56160 | 0.53780 | 0.52190 |
| 0.50588 | 0.48896 | 0.47150 | 0.45034 | 0.43054 | 0.41036 | 0.38690 | 0.36822 |
| 0.34863 | 0.33193 | 0.31760 | 0.30429 | 0.29364 | 0.28374 | 0.27602 | 0.27089 |
| 0.26817 | 0.26761 | 0.26931 | 0.27198 | 0.27541 | 0.27982 | 0.28410 | 0.28959 |
| 0.29511 | 0.30115 | 0.30789 | 0.31369 | 0.32062 | 0.32705 | 0.33223 | 0.33603 |
| 0.33786 | 0.33723 | 0.33406 | 0.32768 | 0.31909 | 0.30870 | 0.29716 | 0.28485 |
| 0.27285 | 0.26154 | 0.25123 | 0.24303 | 0.23672 | 0.23274 | 0.23030 | 0.22948 |
| 0.23019 | 0.23214 | 0.23458 | 0.23737 | 0.23994 | 0.24236 | 0.24366 | 0.24455 |
| 0.24467 | 0.24400 | 0.24237 | 0.24076 | 0.23880 | 0.23732 | 0.23583 | 0.23459 |
| 0.23460 | 0.23465 | 0.23497 | 0.23556 | 0.23638 | 0.23688 | 0.23702 | 0.23688 |
| 0.23556 | 0.23378 | 0.23174 | 0.22922 | 0.22725 | 0.22508 | 0.22281 | 0.22106 |
| 0.21930 | 0.21845 | 0.21741 | 0.21636 | 0.21548 | 0.21448 | 0.21335 | 0.21168 |
| 0.21057 | 0.20956 | 0.20872 | 0.20822 | 0.20786 | 0.20810 | 0.20879 | 0.20939 |
| 0.21088 | 0.21251 | 0.21409 | 0.21559 | 0.21683 | 0.21834 | 0.21927 | 0.21948 |
| 0.21901 | 0.21837 | 0.21744 | 0.21624 | 0.21505 | 0.21405 | 0.21258 | 0.21201 |
| 0.21137 | 0.21104 | 0.21110 | 0.21152 | 0.21204 | 0.21260 | 0.21354 | 0.21380 |
| 0.21411 | 0.21455 | 0.21409 | 0.21277 | 0.21162 | 0.21015 | 0.20869 | 0.20722 |
| 0.20595 | 0.20483 | 0.20443 | 0.20406 | 0.20467 | 0.20498 | 0.20589 | 0.20727 |
| 0.20856 | 0.20956 | 0.21070 | 0.21128 | 0.21218 | 0.21289 | 0.21287 | 0.21391 |

**I(s) short camera s= 3.0 to 28.9 Å<sup>-1</sup>; step 0.1 Å<sup>-1</sup>; λ= 0.04108197 Å, sequence in rows**

|         |         |         |         |         |         |         |         |
|---------|---------|---------|---------|---------|---------|---------|---------|
| 1.99868 | 1.87638 | 1.75993 | 1.65219 | 1.55887 | 1.48102 | 1.41522 | 1.36147 |
| 1.31594 | 1.27998 | 1.25075 | 1.22451 | 1.20071 | 1.17739 | 1.15730 | 1.14069 |
| 1.12479 | 1.10883 | 1.09244 | 1.08219 | 1.07064 | 1.05524 | 1.03843 | 1.01898 |
| 0.99680 | 0.96883 | 0.93457 | 0.89654 | 0.85425 | 0.80847 | 0.76124 | 0.71623 |
| 0.67491 | 0.63884 | 0.60807 | 0.58287 | 0.56366 | 0.54978 | 0.54034 | 0.53488 |
| 0.53195 | 0.53025 | 0.52952 | 0.52886 | 0.52750 | 0.52455 | 0.52011 | 0.51471 |
| 0.50815 | 0.50022 | 0.49171 | 0.48319 | 0.47523 | 0.46827 | 0.46303 | 0.45804 |
| 0.45407 | 0.45192 | 0.45035 | 0.44823 | 0.44596 | 0.44291 | 0.43948 | 0.43498 |
| 0.42910 | 0.42233 | 0.41566 | 0.40884 | 0.40208 | 0.39564 | 0.39011 | 0.38536 |
| 0.38088 | 0.37652 | 0.37268 | 0.36894 | 0.36533 | 0.36135 | 0.35744 | 0.35365 |
| 0.35013 | 0.34706 | 0.34435 | 0.34195 | 0.34022 | 0.33977 | 0.33986 | 0.34043 |
| 0.34138 | 0.34232 | 0.34358 | 0.34400 | 0.34408 | 0.34390 | 0.34294 | 0.34129 |
| 0.33927 | 0.33672 | 0.33374 | 0.33079 | 0.32737 | 0.32438 | 0.32213 | 0.32045 |
| 0.31910 | 0.31793 | 0.31751 | 0.31727 | 0.31685 | 0.31624 | 0.31558 | 0.31472 |
| 0.31334 | 0.31123 | 0.30866 | 0.30567 | 0.30226 | 0.29881 | 0.29563 | 0.29293 |
| 0.29012 | 0.28802 | 0.28643 | 0.28542 | 0.28513 | 0.28522 | 0.28557 | 0.28625 |
| 0.28680 | 0.28712 | 0.28721 | 0.28727 | 0.28712 | 0.28686 | 0.28582 | 0.28458 |
| 0.28286 | 0.28104 | 0.27922 | 0.27772 | 0.27625 | 0.27456 | 0.27312 | 0.27202 |
| 0.27124 | 0.27035 | 0.26989 | 0.26978 | 0.26994 | 0.27024 | 0.27050 | 0.27143 |
| 0.27230 | 0.27290 | 0.27321 | 0.27371 | 0.27399 | 0.27390 | 0.27348 | 0.27272 |
| 0.27192 | 0.27091 | 0.27010 | 0.26911 | 0.26791 | 0.26684 | 0.26561 | 0.26450 |
| 0.26349 | 0.26261 | 0.26173 | 0.26110 | 0.26085 | 0.26057 | 0.26058 | 0.26058 |
| 0.26074 | 0.26120 | 0.26131 | 0.26137 | 0.26160 | 0.26158 | 0.26147 | 0.26127 |
| 0.26094 | 0.26047 | 0.26009 | 0.25981 | 0.25966 | 0.25976 | 0.25958 | 0.25910 |
| 0.25909 | 0.25922 | 0.25942 | 0.25967 | 0.26001 | 0.26045 | 0.26077 | 0.26126 |
| 0.26194 | 0.26235 | 0.26264 | 0.26308 | 0.26334 | 0.26316 | 0.26271 | 0.26252 |
| 0.26220 | 0.26179 | 0.26128 | 0.26074 | 0.25990 | 0.25908 | 0.25862 | 0.25810 |
| 0.25756 | 0.25737 | 0.25727 | 0.25716 | 0.25714 | 0.25721 | 0.25750 | 0.25787 |
| 0.25817 | 0.25864 | 0.25918 | 0.25947 | 0.25994 | 0.26023 | 0.26063 | 0.26111 |
| 0.26165 | 0.26199 | 0.26237 | 0.26309 | 0.26374 | 0.26429 | 0.26459 | 0.26492 |

0.26531 0.26577 0.26608 0.26642 0.26663 0.26694 0.26696 0.26711  
0.26753 0.26778 0.26768 0.26766 0.26778 0.26787 0.26792 0.26820  
0.26851 0.26846 0.26817 0.26816

**Background G(s) long camera, sequence in rows**

1.09898 0.96108 0.84537 0.76890 0.70255 0.64695 0.60436 0.57435  
0.54701 0.52468 0.50301 0.48177 0.46258 0.44416 0.42611 0.41060  
0.39530 0.38135 0.37102 0.36124 0.35235 0.34349 0.33528 0.32814  
0.32240 0.31838 0.31512 0.31248 0.30997 0.30753 0.30528 0.30326  
0.30129 0.29953 0.29769 0.29565 0.29356 0.29159 0.28953 0.28729  
0.28525 0.28325 0.28111 0.27920 0.27726 0.27558 0.27367 0.27177  
0.26987 0.26797 0.26631 0.26420 0.26228 0.26042 0.25866 0.25684  
0.25490 0.25307 0.25119 0.24960 0.24785 0.24614 0.24448 0.24262  
0.24105 0.23942 0.23758 0.23602 0.23479 0.23393 0.23323 0.23247  
0.23177 0.23113 0.23042 0.22976 0.22920 0.22863 0.22801 0.22740  
0.22677 0.22615 0.22549 0.22490 0.22433 0.22378 0.22326 0.22267  
0.22206 0.22146 0.22079 0.22015 0.21952 0.21891 0.21842 0.21783  
0.21742 0.21705 0.21672 0.21640 0.21607 0.21579 0.21546 0.21517  
0.21493 0.21468 0.21444 0.21418 0.21400 0.21381 0.21360 0.21336  
0.21313 0.21287 0.21262 0.21242 0.21218 0.21193 0.21162 0.21138  
0.21106 0.21073 0.21037 0.21017 0.20996 0.20974 0.20957 0.20946  
0.20936 0.20935 0.20932 0.20935 0.20939 0.20945 0.20952 0.20960  
0.20965 0.20974 0.20984 0.20993 0.21000 0.21007 0.21017 0.21025  
0.21034 0.21045 0.21052 0.21062 0.21076 0.21093 0.21106 0.21126

**Background G(s) short camera, sequence in rows**

2.24435 2.13137 2.02279 1.91628 1.82092 1.73903 1.66129 1.59158  
1.52316 1.46136 1.40614 1.35467 1.30356 1.25429 1.20761 1.16420  
1.12184 1.08092 1.04025 1.00469 0.96939 0.93670 0.90715 0.88140  
0.85782 0.83546 0.81340 0.79293 0.77278 0.75214 0.73218 0.71184  
0.69158 0.67297 0.65547 0.63758 0.62266 0.60766 0.59391 0.58313  
0.57380 0.56388 0.55448 0.54459 0.53520 0.52572 0.51681 0.50801  
0.49935 0.49104 0.48309 0.47638 0.47004 0.46396 0.45840 0.45283  
0.44806 0.44420 0.44004 0.43618 0.43217 0.42831 0.42440 0.42054  
0.41663 0.41278 0.40892 0.40510 0.40128 0.39744 0.39365 0.38984  
0.38613 0.38232 0.37865 0.37527 0.37204 0.36888 0.36588 0.36310  
0.36051 0.35801 0.35582 0.35366 0.35159 0.34988 0.34804 0.34629  
0.34458 0.34290 0.34130 0.33963 0.33802 0.33636 0.33474 0.33309  
0.33151 0.32982 0.32830 0.32659 0.32510 0.32341 0.32193 0.32037  
0.31891 0.31737 0.31593 0.31442 0.31296 0.31150 0.31005 0.30862  
0.30718 0.30574 0.30433 0.30288 0.30149 0.30005 0.29868 0.29737  
0.29604 0.29483 0.29358 0.29245 0.29142 0.29042 0.28944 0.28860  
0.28775 0.28692 0.28607 0.28525 0.28441 0.28359 0.28276 0.28196  
0.28117 0.28042 0.27958 0.27887 0.27804 0.27734 0.27653 0.27582  
0.27513 0.27444 0.27383 0.27328 0.27274 0.27222 0.27167 0.27116  
0.27069 0.27021 0.26971 0.26930 0.26881 0.26841 0.26795 0.26753  
0.26710 0.26666 0.26626 0.26589 0.26552 0.26520 0.26488 0.26457  
0.26427 0.26398 0.26369 0.26346 0.26327 0.26308 0.26293 0.26279  
0.26267 0.26257 0.26248 0.26237 0.26226 0.26216 0.26204 0.26193  
0.26180 0.26169 0.26156 0.26145 0.26133 0.26122 0.26112 0.26100  
0.26087 0.26076 0.26063 0.26049 0.26038 0.26025 0.26014 0.26003  
0.25993 0.25984 0.25975 0.25967 0.25960 0.25953 0.25945 0.25939  
0.25932 0.25926 0.25919 0.25913 0.25906 0.25901 0.25896 0.25897  
0.25908 0.25923 0.25941 0.25957 0.25974 0.25990 0.26009 0.26027

0.26047 0.26065 0.26085 0.26104 0.26123 0.26143 0.26162 0.26183  
 0.26203 0.26223 0.26245 0.26265 0.26291 0.26315 0.26340 0.26367  
 0.26395 0.26425 0.26451 0.26480 0.26507 0.26536 0.26560 0.26587  
 0.26616 0.26645 0.26672 0.26701 0.26729 0.26759 0.26788 0.26822  
 0.26856 0.26891 0.26929 0.26969

### Cartesian coordinates (Å) for 1-methylsilatrane

CAM-B3LYP/cc-pVTZ

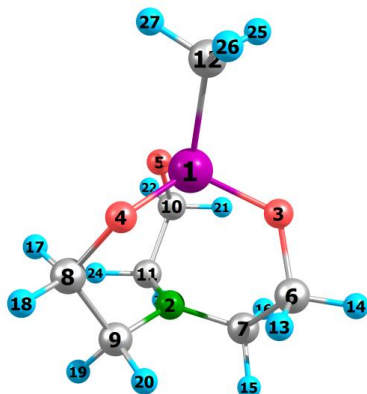

E(RCAM-B3LYP) = -845.795683497

| #  | Z  | x         | y         | z         |
|----|----|-----------|-----------|-----------|
| 1  | 14 | 0.000123  | 0.000058  | 0.038621  |
| 2  | 7  | 0.000230  | 0.000441  | 2.750402  |
| 3  | 8  | 1.564350  | -0.286294 | 0.496576  |
| 4  | 8  | -0.533923 | 1.497963  | 0.496441  |
| 5  | 8  | -1.030039 | -1.211283 | 0.496830  |
| 6  | 6  | 2.171473  | 0.192782  | 1.670736  |
| 7  | 6  | 1.408020  | -0.271543 | 2.906054  |
| 8  | 6  | -1.252244 | 1.784320  | 1.670652  |
| 9  | 6  | -0.468129 | 1.355632  | 2.905899  |
| 10 | 6  | -0.918700 | -1.976344 | 1.671158  |
| 11 | 6  | -0.939214 | -1.082730 | 2.906253  |
| 12 | 6  | 0.000099  | -0.000217 | -1.810358 |
| 13 | 1  | 2.212956  | 1.285854  | 1.646873  |
| 14 | 1  | 3.197879  | -0.175027 | 1.701056  |
| 15 | 1  | 1.831651  | 0.198338  | 3.802888  |
| 16 | 1  | 1.537359  | -1.347905 | 3.015219  |
| 17 | 1  | -2.219530 | 1.273540  | 1.647025  |
| 18 | 1  | -1.447074 | 2.857093  | 1.700804  |
| 19 | 1  | -1.086685 | 1.487721  | 3.802840  |
| 20 | 1  | 0.399351  | 2.005888  | 3.014727  |
| 21 | 1  | 0.007227  | -2.558746 | 1.647475  |
| 22 | 1  | -1.750387 | -2.681384 | 1.701593  |
| 23 | 1  | -0.744163 | -1.684313 | 3.803255  |
| 24 | 1  | -1.936057 | -0.656555 | 3.015215  |
| 25 | 1  | 0.480475  | -0.898770 | -2.195221 |
| 26 | 1  | 0.538040  | 0.864980  | -2.195496 |
| 27 | 1  | -1.018201 | 0.032957  | -2.195376 |

B3LYP-D3/cc-pVTZ

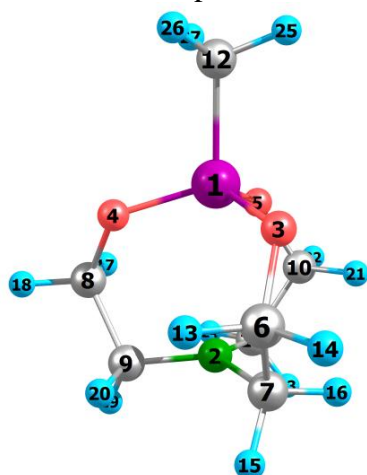

E(RB3LYP) = -846.084482949

| #  | Z  | x         | y         | z         |
|----|----|-----------|-----------|-----------|
| 1  | 14 | 0.000170  | 0.000073  | 0.021682  |
| 2  | 7  | 0.000226  | 0.000444  | 2.796541  |
| 3  | 8  | 1.561451  | -0.314931 | 0.494044  |
| 4  | 8  | -0.507472 | 1.509789  | 0.493915  |
| 5  | 8  | -1.053356 | -1.194376 | 0.494286  |
| 6  | 6  | 2.167057  | 0.188826  | 1.669067  |
| 7  | 6  | 1.415083  | -0.272390 | 2.921906  |
| 8  | 6  | -1.246523 | 1.782486  | 1.668921  |
| 9  | 6  | -0.470926 | 1.362178  | 2.921739  |
| 10 | 6  | -0.919985 | -1.970517 | 1.669453  |
| 11 | 6  | -0.943472 | -1.088442 | 2.922109  |
| 12 | 6  | 0.000068  | -0.000230 | -1.834070 |
| 13 | 1  | 2.193312  | 1.283376  | 1.634523  |
| 14 | 1  | 3.199322  | -0.166350 | 1.698541  |
| 15 | 1  | 1.857775  | 0.200498  | 3.809998  |
| 16 | 1  | 1.546383  | -1.349210 | 3.031922  |
| 17 | 1  | -2.207474 | 1.257777  | 1.634519  |
| 18 | 1  | -1.455226 | 2.854015  | 1.698219  |
| 19 | 1  | -1.101660 | 1.509267  | 3.809908  |
| 20 | 1  | 0.395975  | 2.014354  | 3.031459  |
| 21 | 1  | 0.014751  | -2.540620 | 1.635063  |
| 22 | 1  | -1.743755 | -2.686844 | 1.699015  |
| 23 | 1  | -0.755285 | -1.708068 | 3.810339  |
| 24 | 1  | -1.941690 | -0.663755 | 3.032008  |
| 25 | 1  | 0.475834  | -0.903199 | -2.217530 |
| 26 | 1  | 0.544087  | 0.863202  | -2.217835 |
| 27 | 1  | -1.019786 | 0.039107  | -2.217601 |

B3LYP/6-311G\*\*

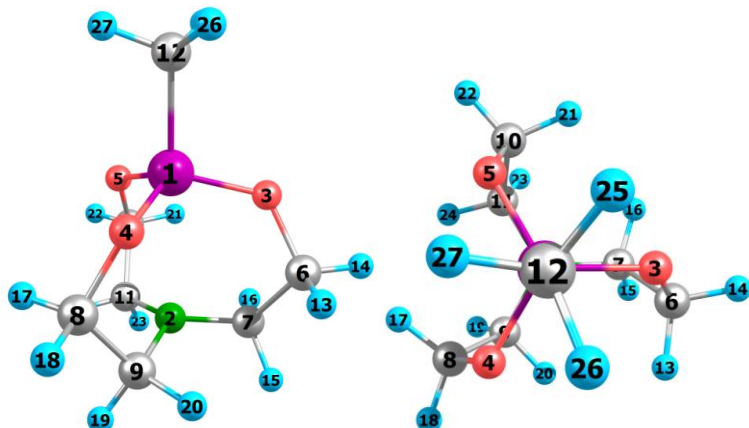

E(RB3LYP) = -845.989638011

| #  | Z  | x         | y         | z         |
|----|----|-----------|-----------|-----------|
| 1  | 14 | 0.000082  | 0.000049  | 0.037808  |
| 2  | 7  | 0.000204  | 0.000469  | 2.727088  |
| 3  | 8  | 1.588322  | -0.267583 | 0.483260  |
| 4  | 8  | -0.562305 | 1.509350  | 0.483152  |
| 5  | 8  | -1.025764 | -1.241544 | 0.483523  |
| 6  | 6  | 2.198013  | 0.198667  | 1.672634  |
| 7  | 6  | 1.416756  | -0.270430 | 2.909045  |
| 8  | 6  | -1.270742 | 1.804336  | 1.672605  |
| 9  | 6  | -0.473493 | 1.362692  | 2.908902  |
| 10 | 6  | -0.926644 | -2.002335 | 1.673094  |
| 11 | 6  | -0.942665 | -1.090843 | 2.909203  |
| 12 | 6  | 0.000074  | -0.000185 | -1.819837 |
| 13 | 1  | 2.255179  | 1.294786  | 1.657487  |
| 14 | 1  | 3.221507  | -0.185940 | 1.703170  |
| 15 | 1  | 1.825065  | 0.201865  | 3.816066  |
| 16 | 1  | 1.545968  | -1.349885 | 3.019588  |
| 17 | 1  | -2.248477 | 1.305555  | 1.657783  |
| 18 | 1  | -1.449634 | 2.882979  | 1.702949  |
| 19 | 1  | -1.086418 | 1.480317  | 3.816071  |
| 20 | 1  | 0.396714  | 2.014414  | 3.019020  |
| 21 | 1  | -0.005731 | -2.599547 | 1.658190  |
| 22 | 1  | -1.771222 | -2.696698 | 1.703750  |
| 23 | 1  | -0.738000 | -1.680270 | 3.816482  |
| 24 | 1  | -1.942164 | -0.663042 | 3.019299  |
| 25 | 1  | 0.487859  | -0.898389 | -2.205926 |
| 26 | 1  | 0.534023  | 0.871256  | -2.206175 |
| 27 | 1  | -1.021624 | 0.026413  | -2.206092 |

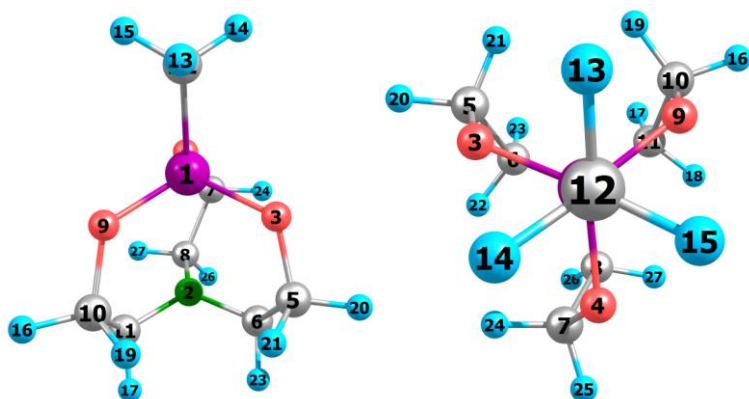

E(RB3LYP) = -845.985283978

| #  | Z  | x         | y         | z         |
|----|----|-----------|-----------|-----------|
| 1  | 14 | -3.195683 | 0.096184  | 1.216658  |
| 2  | 7  | -0.548451 | 0.259844  | 1.328888  |
| 3  | 8  | -2.660284 | -0.963950 | 0.036939  |
| 4  | 8  | -2.804283 | -0.432812 | 2.753034  |
| 5  | 6  | -1.437948 | -0.900143 | -0.671014 |
| 6  | 6  | -0.239849 | -0.701752 | 0.280901  |
| 7  | 6  | -1.589465 | -1.066262 | 3.100346  |
| 8  | 6  | -0.394422 | -0.190371 | 2.707970  |
| 9  | 8  | -2.846513 | 1.695187  | 0.876847  |
| 10 | 6  | -1.660080 | 2.219764  | 0.316161  |
| 11 | 6  | -0.406392 | 1.675924  | 1.031097  |
| 12 | 6  | -5.052519 | 0.023844  | 1.188024  |
| 13 | 1  | -5.441718 | 0.383066  | 0.232729  |
| 14 | 1  | -5.400786 | -1.000378 | 1.340291  |
| 15 | 1  | -5.473062 | 0.645230  | 1.982475  |
| 16 | 1  | -1.691577 | 3.309178  | 0.413195  |
| 17 | 1  | 0.486168  | 1.883516  | 0.420630  |
| 18 | 1  | -0.287098 | 2.208133  | 1.976343  |
| 19 | 1  | -1.621272 | 1.993095  | -0.756226 |
| 20 | 1  | -1.316074 | -1.837661 | -1.221854 |
| 21 | 1  | -1.475217 | -0.092742 | -1.412001 |
| 22 | 1  | -0.010102 | -1.657837 | 0.757224  |
| 23 | 1  | 0.647584  | -0.403918 | -0.298568 |
| 24 | 1  | -1.522271 | -2.045224 | 2.606888  |
| 25 | 1  | -1.589869 | -1.239938 | 4.180346  |
| 26 | 1  | 0.547283  | -0.736527 | 2.871920  |
| 27 | 1  | -0.382957 | 0.690559  | 3.351960  |

M062X/6-311G\*\*

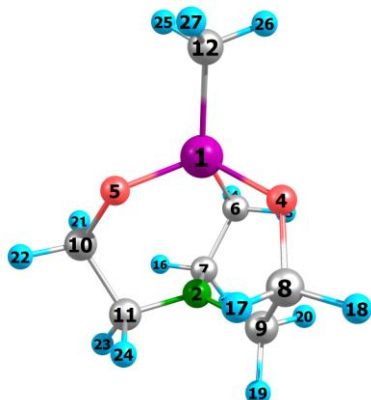

E(RM062X) = -845.732920465

| #  | Z  | x         | y         | z         |
|----|----|-----------|-----------|-----------|
| 1  | 14 | 0.000103  | 0.000098  | 0.041406  |
| 2  | 7  | 0.000232  | 0.000426  | 2.736510  |
| 3  | 8  | 1.558779  | -0.334612 | 0.508018  |
| 4  | 8  | -0.489223 | 1.517370  | 0.507919  |
| 5  | 8  | -1.069160 | -1.182247 | 0.508285  |
| 6  | 6  | 2.167694  | 0.189482  | 1.666043  |
| 7  | 6  | 1.411221  | -0.272228 | 2.913014  |
| 8  | 6  | -1.247511 | 1.782703  | 1.665972  |
| 9  | 6  | -0.469156 | 1.358710  | 2.912871  |
| 10 | 6  | -0.919680 | -1.971408 | 1.666453  |
| 11 | 6  | -0.941376 | -1.085175 | 2.913224  |
| 12 | 6  | 0.000089  | -0.000235 | -1.805636 |
| 13 | 1  | 2.174403  | 1.285655  | 1.620058  |
| 14 | 1  | 3.203529  | -0.155236 | 1.693587  |
| 15 | 1  | 1.823856  | 0.206549  | 3.812355  |
| 16 | 1  | 1.540824  | -1.351983 | 3.022063  |
| 17 | 1  | -2.200125 | 1.240307  | 1.620085  |
| 18 | 1  | -1.466998 | 2.852102  | 1.693430  |
| 19 | 1  | -1.089877 | 1.476878  | 3.812346  |
| 20 | 1  | 0.401105  | 2.010941  | 3.021496  |
| 21 | 1  | 0.026308  | -2.525272 | 1.620576  |
| 22 | 1  | -1.736106 | -2.696132 | 1.694146  |
| 23 | 1  | -0.733128 | -1.681716 | 3.812713  |
| 24 | 1  | -1.941292 | -0.657555 | 3.022102  |
| 25 | 1  | 0.449226  | -0.918146 | -2.188722 |
| 26 | 1  | 0.570432  | 0.847515  | -2.189123 |
| 27 | 1  | -1.019287 | 0.069667  | -2.189052 |

MP2/6-311G\*\*

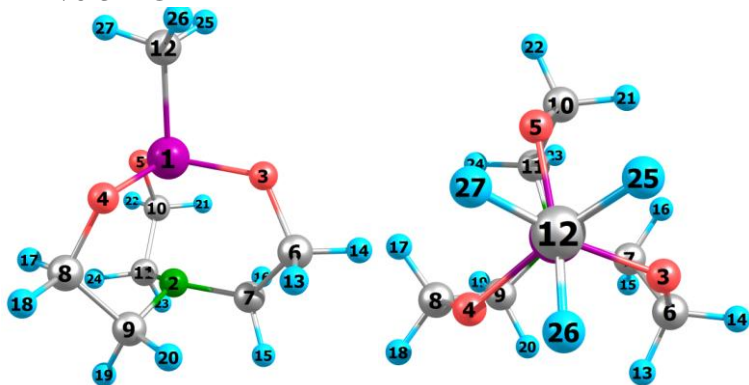

| #  | Z  | x         | y         | z         |
|----|----|-----------|-----------|-----------|
| 1  | 14 | 0.000140  | 0.000047  | 0.129543  |
| 2  | 7  | 0.000213  | 0.000390  | 2.548151  |
| 3  | 8  | 1.634580  | -0.197533 | 0.472196  |
| 4  | 8  | -0.645912 | 1.514368  | 0.472022  |
| 5  | 8  | -0.988217 | -1.316546 | 0.472434  |
| 6  | 6  | 2.222030  | 0.222082  | 1.682266  |
| 7  | 6  | 1.393299  | -0.305303 | 2.853316  |
| 8  | 6  | -1.302832 | 1.813532  | 1.682146  |
| 9  | 6  | -0.431541 | 1.359742  | 2.853135  |
| 10 | 6  | -0.918638 | -2.034813 | 1.682680  |
| 11 | 6  | -0.961092 | -1.053139 | 2.853493  |
| 12 | 6  | 0.000084  | -0.000217 | -1.728132 |
| 13 | 1  | 2.272629  | 1.319157  | 1.720658  |
| 14 | 1  | 3.243940  | -0.166369 | 1.727761  |
| 15 | 1  | 1.717844  | 0.117821  | 3.815665  |
| 16 | 1  | 1.502854  | -1.392798 | 2.895293  |
| 17 | 1  | -2.278220 | 1.308822  | 1.720795  |
| 18 | 1  | -1.477371 | 2.892766  | 1.727469  |
| 19 | 1  | -0.960088 | 1.429424  | 3.815559  |
| 20 | 1  | 0.455487  | 1.998374  | 2.894844  |
| 21 | 1  | 0.006155  | -2.627161 | 1.721284  |
| 22 | 1  | -1.766005 | -2.725576 | 1.728275  |
| 23 | 1  | -0.757003 | -1.545536 | 3.815975  |
| 24 | 1  | -1.957671 | -0.604259 | 2.895286  |
| 25 | 1  | 0.517361  | -0.882724 | -2.113216 |
| 26 | 1  | 0.505654  | 0.888939  | -2.113467 |
| 27 | 1  | -1.022798 | -0.007031 | -2.113293 |



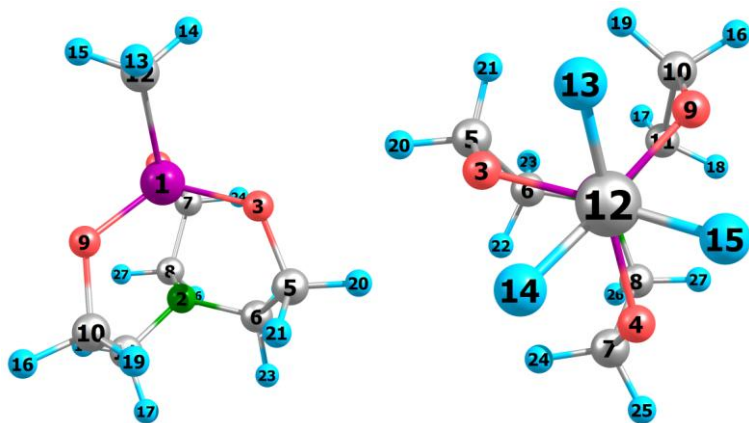

| #  | Z  | x         | y         | z         |
|----|----|-----------|-----------|-----------|
| 1  | 14 | -3.116729 | 0.104710  | 1.221961  |
| 2  | 7  | -0.689327 | 0.255095  | 1.329382  |
| 3  | 8  | -2.670460 | -0.916611 | -0.036610 |
| 4  | 8  | -2.801173 | -0.505850 | 2.754598  |
| 5  | 6  | -1.427744 | -0.870291 | -0.699733 |
| 6  | 6  | -0.292439 | -0.721435 | 0.319634  |
| 7  | 6  | -1.572433 | -1.101009 | 3.099815  |
| 8  | 6  | -0.436729 | -0.160904 | 2.707822  |
| 9  | 8  | -2.846468 | 1.735451  | 0.913583  |
| 10 | 6  | -1.677277 | 2.223095  | 0.297883  |
| 11 | 6  | -0.438742 | 1.655972  | 1.005977  |
| 12 | 6  | -4.972958 | 0.031922  | 1.209168  |
| 13 | 1  | -5.369234 | 0.415397  | 0.265935  |
| 14 | 1  | -5.319061 | -0.996272 | 1.340762  |
| 15 | 1  | -5.385134 | 0.634392  | 2.023120  |
| 16 | 1  | -1.676124 | 3.315371  | 0.369635  |
| 17 | 1  | 0.465462  | 1.784478  | 0.392678  |
| 18 | 1  | -0.299232 | 2.197326  | 1.944901  |
| 19 | 1  | -1.666503 | 1.960522  | -0.767326 |
| 20 | 1  | -1.300173 | -1.800918 | -1.262097 |
| 21 | 1  | -1.407076 | -0.041939 | -1.418579 |
| 22 | 1  | -0.152063 | -1.683748 | 0.819949  |
| 23 | 1  | 0.653123  | -0.445690 | -0.171388 |
| 24 | 1  | -1.461078 | -2.068634 | 2.590345  |
| 25 | 1  | -1.562348 | -1.283832 | 4.178677  |
| 26 | 1  | 0.550332  | -0.629442 | 2.839035  |
| 27 | 1  | -0.495268 | 0.726853  | 3.342076  |

**Cartesian coordinates (Å) for molecules 1-2**

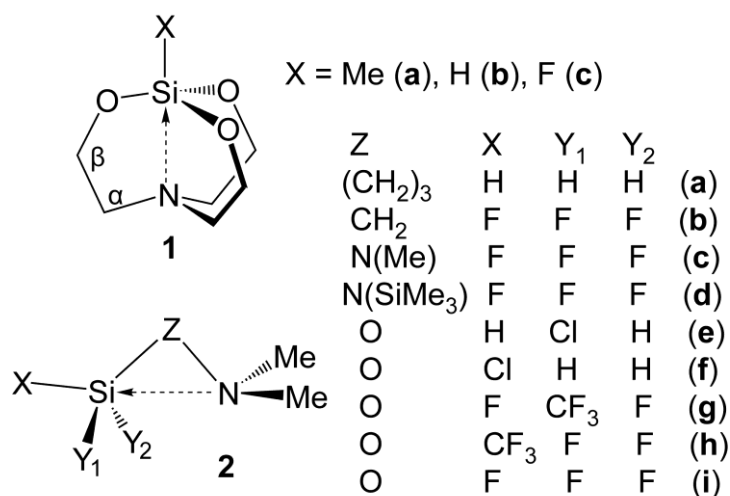

**H<sub>3</sub>Si(CH<sub>2</sub>)<sub>3</sub>NMe<sub>2</sub> (2a)**, CCSD/6-311G(d,p)  
E(CCSD)=-542.6521219 au

|    |           |           |           |
|----|-----------|-----------|-----------|
| 6  | 1.761924  | 0.765052  | -0.264652 |
| 14 | 1.650837  | -1.089868 | 0.130102  |
| 1  | 0.977359  | -1.899985 | -0.906254 |
| 6  | 0.575692  | 1.655296  | 0.146199  |
| 6  | -0.740184 | 1.177747  | -0.470423 |
| 7  | -1.068216 | -0.177652 | -0.021191 |
| 6  | -1.687311 | -0.168381 | 1.301027  |
| 6  | -1.932776 | -0.864139 | -0.975103 |
| 1  | 3.062465  | -1.566396 | 0.154429  |
| 1  | 1.099509  | -1.362768 | 1.475676  |
| 1  | 2.676889  | 1.139391  | 0.214587  |
| 1  | 1.930322  | 0.866654  | -1.347660 |
| 1  | 0.488427  | 1.678777  | 1.240161  |
| 1  | 0.754325  | 2.691301  | -0.173261 |
| 1  | -1.561560 | 1.885611  | -0.250228 |
| 1  | -0.620249 | 1.149674  | -1.561492 |
| 1  | -2.142667 | -1.876015 | -0.611936 |
| 1  | -2.895343 | -0.340094 | -1.123509 |
| 1  | -1.424153 | -0.946112 | -1.941234 |
| 1  | -1.826802 | -1.198937 | 1.644565  |
| 1  | -1.039123 | 0.339336  | 2.020322  |
| 1  | -2.670047 | 0.339366  | 1.294139  |

**H<sub>3</sub>Si(CH<sub>2</sub>)<sub>3</sub>NMe<sub>2</sub> (2a)**, MP2/6-311G(d,p)  
E(MP2)=-542.5603511 au

|    |          |           |           |
|----|----------|-----------|-----------|
| 6  | 1.751110 | 0.761379  | -0.248382 |
| 14 | 1.578890 | -1.097638 | 0.091948  |
| 1  | 0.904426 | -1.869365 | -0.971714 |
| 6  | 0.582538 | 1.667111  | 0.161291  |

|   |           |           |           |
|---|-----------|-----------|-----------|
| 6 | -0.727985 | 1.194025  | -0.459579 |
| 7 | -1.036259 | -0.167010 | -0.020477 |
| 6 | -1.645094 | -0.170237 | 1.304355  |
| 6 | -1.908132 | -0.848106 | -0.968820 |
| 1 | 2.981832  | -1.602510 | 0.101924  |
| 1 | 1.035068  | -1.403887 | 1.432277  |
| 1 | 2.667638  | 1.094455  | 0.253789  |
| 1 | 1.940529  | 0.882494  | -1.324302 |
| 1 | 0.490778  | 1.688506  | 1.253259  |
| 1 | 0.769880  | 2.700633  | -0.155660 |
| 1 | -1.557671 | 1.888628  | -0.232550 |
| 1 | -0.606854 | 1.173534  | -1.549661 |
| 1 | -2.103828 | -1.864255 | -0.614743 |
| 1 | -2.874648 | -0.328784 | -1.094308 |
| 1 | -1.412547 | -0.912907 | -1.941018 |
| 1 | -1.774383 | -1.202703 | 1.640694  |
| 1 | -0.995740 | 0.336532  | 2.020680  |
| 1 | -2.629746 | 0.330594  | 1.304219  |

**H<sub>3</sub>Si(CH<sub>2</sub>)<sub>3</sub>NMe<sub>2</sub> (2a)**, MP2/aug-cc-pVTZ  
E(MP2)= -542.7896729 au

|    |           |           |           |
|----|-----------|-----------|-----------|
| 6  | 1.759831  | 0.745810  | -0.205058 |
| 14 | 1.504974  | -1.115543 | 0.075778  |
| 1  | 0.829776  | -1.838816 | -1.027452 |
| 6  | 0.597058  | 1.675665  | 0.141485  |
| 6  | -0.694468 | 1.190084  | -0.496001 |
| 7  | -1.013662 | -0.152358 | -0.019368 |
| 6  | -1.609863 | -0.122547 | 1.307465  |
| 6  | -1.892381 | -0.852808 | -0.941979 |
| 1  | 2.895409  | -1.668863 | 0.083927  |
| 1  | 0.945353  | -1.460142 | 1.405007  |
| 1  | 2.649650  | 1.028093  | 0.362800  |
| 1  | 2.029093  | 0.869981  | -1.259425 |
| 1  | 0.476185  | 1.731565  | 1.225151  |
| 1  | 0.800187  | 2.694370  | -0.197568 |
| 1  | -1.527071 | 1.887327  | -0.312372 |
| 1  | -0.551152 | 1.130640  | -1.578282 |
| 1  | -2.077944 | -1.860896 | -0.571514 |
| 1  | -2.859111 | -0.341471 | -1.060441 |
| 1  | -1.412425 | -0.927879 | -1.916931 |
| 1  | -1.763853 | -1.143355 | 1.656033  |
| 1  | -0.946048 | 0.374614  | 2.011437  |
| 1  | -2.577633 | 0.401152  | 1.305267  |

**H<sub>3</sub>Si(CH<sub>2</sub>)<sub>3</sub>NMe<sub>2</sub> (2a)**, SCS-MP2/6-311G(d,p)  
E(SCS-MP2)= -542.5654736 au

|    |          |           |           |
|----|----------|-----------|-----------|
| 6  | 1.751009 | 0.781667  | -0.261472 |
| 14 | 1.641632 | -1.082716 | 0.092505  |
| 1  | 0.968710 | -1.872138 | -0.958433 |
| 6  | 0.565482 | 1.662563  | 0.172897  |

|   |           |           |           |
|---|-----------|-----------|-----------|
| 6 | -0.750993 | 1.188667  | -0.446680 |
| 7 | -1.062566 | -0.180636 | -0.020112 |
| 6 | -1.679801 | -0.197266 | 1.305878  |
| 6 | -1.933707 | -0.853396 | -0.982194 |
| 1 | 3.054509  | -1.555219 | 0.097514  |
| 1 | 1.103707  | -1.387493 | 1.435334  |
| 1 | 2.667702  | 1.145453  | 0.222373  |
| 1 | 1.915280  | 0.907288  | -1.342349 |
| 1 | 0.483807  | 1.665530  | 1.267103  |
| 1 | 0.738700  | 2.704477  | -0.129465 |
| 1 | -1.577897 | 1.883956  | -0.207809 |
| 1 | -0.636216 | 1.181174  | -1.538464 |
| 1 | -2.132803 | -1.873476 | -0.637838 |
| 1 | -2.900166 | -0.332004 | -1.109596 |
| 1 | -1.432688 | -0.910482 | -1.953410 |
| 1 | -1.813507 | -1.234418 | 1.629694  |
| 1 | -1.031667 | 0.300321  | 2.031455  |
| 1 | -2.664298 | 0.306104  | 1.309018  |

**H<sub>3</sub>Si(CH<sub>2</sub>)<sub>3</sub>NMe<sub>2</sub> (2a)**, SCS-MP2/aug-cc-pVTZ  
E(SCS-MP2)= -542.803576 au

|    |           |           |           |
|----|-----------|-----------|-----------|
| 6  | 1.761660  | 0.768828  | -0.233088 |
| 14 | 1.595152  | -1.097121 | 0.094071  |
| 1  | 0.915122  | -1.860475 | -0.977264 |
| 6  | 0.576729  | 1.666825  | 0.145704  |
| 6  | -0.722650 | 1.179026  | -0.485651 |
| 7  | -1.048595 | -0.169473 | -0.017049 |
| 6  | -1.660176 | -0.144922 | 1.307847  |
| 6  | -1.922839 | -0.864404 | -0.955259 |
| 1  | 2.999610  | -1.608255 | 0.102573  |
| 1  | 1.043177  | -1.414353 | 1.432637  |
| 1  | 2.658012  | 1.099442  | 0.299907  |
| 1  | 1.988142  | 0.890912  | -1.298570 |
| 1  | 0.471003  | 1.700859  | 1.232700  |
| 1  | 0.760293  | 2.695417  | -0.177899 |
| 1  | -1.549712 | 1.880546  | -0.290564 |
| 1  | -0.588056 | 1.130265  | -1.569890 |
| 1  | -2.119023 | -1.872709 | -0.588967 |
| 1  | -2.886350 | -0.348309 | -1.086890 |
| 1  | -1.431000 | -0.940768 | -1.924958 |
| 1  | -1.819457 | -1.167730 | 1.650294  |
| 1  | -1.002056 | 0.348831  | 2.020554  |
| 1  | -2.628006 | 0.380223  | 1.301369  |

**F<sub>3</sub>SiCH<sub>2</sub>NMe<sub>2</sub> (2b)**, CCSD/6-311G(d,p)  
E(CCSD)=-761.6636817 au

|    |           |           |           |
|----|-----------|-----------|-----------|
| 14 | 1.114213  | -0.051042 | -0.010635 |
| 6  | -0.544978 | -0.511347 | -0.690445 |
| 7  | -1.617253 | -0.069528 | 0.212216  |

|   |           |           |           |
|---|-----------|-----------|-----------|
| 9 | 2.256441  | -0.396365 | -1.065337 |
| 9 | 1.435961  | -0.869666 | 1.311574  |
| 9 | 1.261729  | 1.493030  | 0.344745  |
| 1 | -0.546608 | -1.609336 | -0.726229 |
| 1 | -0.688304 | -0.169309 | -1.732719 |
| 6 | -1.979159 | 1.320127  | -0.061427 |
| 6 | -2.792358 | -0.926273 | 0.076951  |
| 1 | -2.393514 | 1.446164  | -1.080255 |
| 1 | -2.730728 | 1.648012  | 0.663433  |
| 1 | -1.102597 | 1.964852  | 0.038684  |
| 1 | -3.193654 | -0.926561 | -0.954323 |
| 1 | -2.535897 | -1.953459 | 0.355088  |
| 1 | -3.576273 | -0.572679 | 0.754454  |

**F<sub>3</sub>SiCH<sub>2</sub>NMe<sub>2</sub> (2b)**, MP2/6-311G(d,p)

E(MP2)=-761.6168225 au

|    |           |           |           |
|----|-----------|-----------|-----------|
| 14 | 1.107974  | -0.050521 | -0.011023 |
| 6  | -0.548492 | -0.512186 | -0.691049 |
| 7  | -1.611955 | -0.069741 | 0.218333  |
| 9  | 2.256485  | -0.380121 | -1.070935 |
| 9  | 1.430352  | -0.884073 | 1.307128  |
| 9  | 1.244311  | 1.495477  | 0.360903  |
| 1  | -0.550253 | -1.609053 | -0.722978 |
| 1  | -0.700224 | -0.172483 | -1.732095 |
| 6  | -1.973890 | 1.315634  | -0.064503 |
| 6  | -2.787244 | -0.921782 | 0.079704  |
| 1  | -2.388471 | 1.431415  | -1.083294 |
| 1  | -2.724428 | 1.647259  | 0.657136  |
| 1  | -1.098502 | 1.959886  | 0.029648  |
| 1  | -3.185123 | -0.916812 | -0.951661 |
| 1  | -2.533603 | -1.948630 | 0.354760  |
| 1  | -3.569916 | -0.567651 | 0.755700  |

**F<sub>3</sub>SiCH<sub>2</sub>NMe<sub>2</sub> (2b)**, MP2/aug-cc-pVTZ

E(MP2)= -762.0029289 au

|    |           |           |           |
|----|-----------|-----------|-----------|
| 14 | 1.113781  | -0.054667 | -0.008526 |
| 6  | -0.560890 | -0.570495 | -0.614595 |
| 7  | -1.635201 | -0.073417 | 0.243748  |
| 9  | 2.231251  | -0.524178 | -1.041754 |
| 9  | 1.449598  | -0.728089 | 1.390001  |
| 9  | 1.280101  | 1.517552  | 0.176784  |
| 1  | -0.549340 | -1.663661 | -0.564066 |
| 1  | -0.709337 | -0.314210 | -1.677017 |
| 6  | -1.944765 | 1.314086  | -0.076203 |
| 6  | -2.830356 | -0.887585 | 0.072575  |
| 1  | -2.287718 | 1.422190  | -1.117848 |
| 1  | -2.733739 | 1.667038  | 0.585665  |
| 1  | -1.069180 | 1.943119  | 0.066268  |
| 1  | -3.193027 | -0.869987 | -0.967441 |
| 1  | -2.616761 | -1.918357 | 0.350624  |

1 -3.619908 -0.510482 0.720996

**F<sub>3</sub>SiCH<sub>2</sub>NMe<sub>2</sub> (2b)**, SCS-MP2/6-311G(d,p)

E(SCS-MP2) = -761.5876054 au

|    |           |           |           |
|----|-----------|-----------|-----------|
| 14 | 1.111880  | -0.050017 | -0.010669 |
| 6  | -0.547847 | -0.507758 | -0.696334 |
| 7  | -1.617389 | -0.068347 | 0.215468  |
| 9  | 2.260715  | -0.382991 | -1.069263 |
| 9  | 1.431759  | -0.884559 | 1.307421  |
| 9  | 1.254277  | 1.495263  | 0.361287  |
| 1  | -0.551262 | -1.605400 | -0.735731 |
| 1  | -0.695239 | -0.160791 | -1.736092 |
| 6  | -1.986793 | 1.320717  | -0.063618 |
| 6  | -2.792536 | -0.929254 | 0.081917  |
| 1  | -2.406818 | 1.439869  | -1.080449 |
| 1  | -2.735229 | 1.647820  | 0.664142  |
| 1  | -1.111693 | 1.967679  | 0.029270  |
| 1  | -3.195984 | -0.929932 | -0.948047 |
| 1  | -2.531606 | -1.954961 | 0.359377  |
| 1  | -3.574486 | -0.577271 | 0.761825  |

**F<sub>3</sub>SiCH<sub>2</sub>NMe<sub>2</sub> (2b)**, SCS-MP2/aug-cc-pVTZ

E(SCS-MP2) = -761.9802152 au

|    |           |           |           |
|----|-----------|-----------|-----------|
| 14 | 1.118267  | -0.053728 | -0.007982 |
| 6  | -0.559825 | -0.564189 | -0.621091 |
| 7  | -1.640948 | -0.071434 | 0.239873  |
| 9  | 2.234453  | -0.525205 | -1.040445 |
| 9  | 1.450656  | -0.731576 | 1.388178  |
| 9  | 1.292131  | 1.516181  | 0.180373  |
| 1  | -0.550410 | -1.658196 | -0.577919 |
| 1  | -0.704149 | -0.300813 | -1.682222 |
| 6  | -1.959563 | 1.319898  | -0.075305 |
| 6  | -2.835328 | -0.896113 | 0.075152  |
| 1  | -2.308453 | 1.432846  | -1.114570 |
| 1  | -2.746314 | 1.666918  | 0.593609  |
| 1  | -1.084863 | 1.951532  | 0.066449  |
| 1  | -3.204488 | -0.886058 | -0.962877 |
| 1  | -2.613319 | -1.924810 | 0.357372  |
| 1  | -3.623975 | -0.521370 | 0.727297  |

**F<sub>3</sub>SiN(Me)NMe<sub>2</sub> (2c)**, CCSD/6-311G(d,p)

E(CCSD) = -816.8835524 au

|    |           |           |           |
|----|-----------|-----------|-----------|
| 14 | 1.115957  | -0.100996 | -0.000309 |
| 7  | -0.414844 | 0.581278  | 0.000206  |
| 7  | -1.354123 | -0.488502 | -0.000100 |
| 6  | -2.165545 | -0.504284 | 1.215537  |
| 6  | -2.165964 | -0.503218 | -1.215471 |
| 1  | -1.499055 | -0.493940 | 2.081692  |

|   |           |           |           |
|---|-----------|-----------|-----------|
| 1 | -2.751775 | -1.428505 | 1.228827  |
| 1 | -2.860643 | 0.349340  | 1.279908  |
| 1 | -1.499771 | -0.492135 | -2.081844 |
| 1 | -2.752212 | -1.427419 | -1.229357 |
| 1 | -2.861075 | 0.350468  | -1.278864 |
| 9 | 1.412057  | -1.015057 | -1.266160 |
| 9 | 1.412509  | -1.016046 | 1.264724  |
| 9 | 2.193548  | 1.070900  | -0.000033 |
| 6 | -0.854342 | 1.970812  | 0.001032  |
| 1 | -1.443704 | 2.211631  | 0.894329  |
| 1 | 0.038220  | 2.602233  | 0.000948  |
| 1 | -1.444427 | 2.212433  | -0.891567 |

**F<sub>3</sub>SiN(Me)NMe<sub>2</sub> (2c), MP2/6-311G(d,p)**

E(MP2) = -816.8313659 au

|    |           |           |           |
|----|-----------|-----------|-----------|
| 14 | 1.108591  | -0.107958 | -0.000151 |
| 7  | -0.416639 | 0.591415  | -0.000341 |
| 7  | -1.346082 | -0.487864 | -0.000335 |
| 6  | -2.157633 | -0.502601 | 1.212870  |
| 6  | -2.158859 | -0.501431 | -1.212725 |
| 1  | -1.491338 | -0.487390 | 2.076944  |
| 1  | -2.739699 | -1.427411 | 1.227190  |
| 1  | -2.854215 | 0.348263  | 1.272476  |
| 1  | -1.493427 | -0.485378 | -2.077448 |
| 1  | -2.741014 | -1.426185 | -1.227387 |
| 1  | -2.855430 | 0.349556  | -1.270799 |
| 9  | 1.398652  | -1.025763 | -1.270850 |
| 9  | 1.397567  | -1.027431 | 1.269627  |
| 9  | 2.199120  | 1.059201  | 0.001042  |
| 6  | -0.864080 | 1.975049  | 0.000647  |
| 1  | -1.453346 | 2.212957  | 0.892755  |
| 1  | 0.025790  | 2.607698  | 0.001225  |
| 1  | -1.453149 | 2.214266  | -0.891242 |

**F<sub>3</sub>SiN(Me)NMe<sub>2</sub> (2c), MP2/aug-cc-pVTZ**

E(MP2) = -817.2604626 au

|    |           |           |           |
|----|-----------|-----------|-----------|
| 14 | -1.116213 | -0.105575 | 0.000010  |
| 7  | 0.416989  | 0.583357  | -0.000050 |
| 7  | 1.348852  | -0.494797 | 0.000049  |
| 6  | 2.163681  | -0.498959 | -1.207821 |
| 6  | 2.163743  | -0.498679 | 1.207878  |
| 1  | 1.508197  | -0.495372 | -2.075612 |
| 1  | 2.759549  | -1.410033 | -1.215906 |
| 1  | 2.844955  | 0.359356  | -1.261774 |
| 1  | 1.508302  | -0.494844 | 2.075702  |
| 1  | 2.759583  | -1.409769 | 1.216171  |
| 1  | 2.845044  | 0.359631  | 1.261576  |
| 9  | -1.407367 | -1.022525 | 1.265276  |
| 9  | -1.407184 | -1.023074 | -1.264898 |

|   |           |          |           |
|---|-----------|----------|-----------|
| 9 | -2.194557 | 1.066841 | -0.000303 |
| 6 | 0.873003  | 1.959872 | -0.000134 |
| 1 | 1.462919  | 2.191603 | -0.888322 |
| 1 | -0.005748 | 2.601180 | -0.000321 |
| 1 | 1.462696  | 2.191798 | 0.888152  |

**F<sub>3</sub>SiN(Me)NMe<sub>2</sub> (2c)**, SCS-MP2/6-311G(d,p)  
E(SCS-MP2) = -816.7975192 au

|    |           |           |           |
|----|-----------|-----------|-----------|
| 14 | 1.111794  | -0.109808 | -0.000078 |
| 7  | -0.415327 | 0.587756  | 0.000047  |
| 7  | -1.355461 | -0.487722 | -0.000219 |
| 6  | -2.169568 | -0.499045 | 1.216687  |
| 6  | -2.170092 | -0.497948 | -1.216785 |
| 1  | -1.502769 | -0.487732 | 2.081904  |
| 1  | -2.755840 | -1.422733 | 1.229900  |
| 1  | -2.863126 | 0.355343  | 1.277570  |
| 1  | -1.503654 | -0.485526 | -2.082266 |
| 1  | -2.756152 | -1.421759 | -1.230768 |
| 1  | -2.863864 | 0.356358  | -1.276460 |
| 9  | 1.403493  | -1.028106 | -1.269942 |
| 9  | 1.402965  | -1.029558 | 1.268877  |
| 9  | 2.201653  | 1.057664  | 0.000783  |
| 6  | -0.853086 | 1.979364  | 0.000567  |
| 1  | -1.441681 | 2.220810  | 0.893440  |
| 1  | 0.042106  | 2.606427  | 0.001147  |
| 1  | -1.441145 | 2.221660  | -0.892435 |

**F<sub>3</sub>SiN(Me)NMe<sub>2</sub> (2c)**, SCS-MP2/aug-cc-pVTZ  
E(SCS-MP2) = -817.2337554 au

|    |           |           |           |
|----|-----------|-----------|-----------|
| 14 | -1.118699 | -0.107292 | 0.000005  |
| 7  | 0.415136  | 0.581960  | -0.000055 |
| 7  | 1.356767  | -0.493374 | 0.000036  |
| 6  | 2.173263  | -0.496958 | -1.211935 |
| 6  | 2.173291  | -0.496730 | 1.211990  |
| 1  | 1.516601  | -0.495191 | -2.079649 |
| 1  | 2.769615  | -1.408706 | -1.219351 |
| 1  | 2.854127  | 0.362006  | -1.268456 |
| 1  | 1.516648  | -0.494763 | 2.079719  |
| 1  | 2.769621  | -1.408491 | 1.219586  |
| 1  | 2.854176  | 0.362231  | 1.268317  |
| 9  | -1.410742 | -1.023885 | 1.263994  |
| 9  | -1.410587 | -1.024378 | -1.263658 |
| 9  | -2.197685 | 1.062996  | -0.000271 |
| 6  | 0.863801  | 1.965430  | -0.000107 |
| 1  | 1.452982  | 2.199742  | -0.888827 |
| 1  | -0.019068 | 2.602214  | -0.000274 |
| 1  | 1.452763  | 2.199892  | 0.888720  |



**F<sub>3</sub>SiN(SiMe<sub>3</sub>)NMe<sub>2</sub> (2d), CCSD/6-311G(d,p)**

E(CCSD)=-1185.5907179 au

|    |           |           |           |
|----|-----------|-----------|-----------|
| 14 | 1.562551  | -0.512895 | 0.001228  |
| 7  | 0.024624  | 0.171245  | -0.102186 |
| 7  | 0.488078  | 1.547725  | 0.022944  |
| 6  | 0.239707  | 2.326851  | -1.188713 |
| 6  | -0.003899 | 2.195032  | 1.234679  |
| 1  | 0.636090  | 1.776849  | -2.044879 |
| 1  | 0.778410  | 3.276157  | -1.098387 |
| 1  | -0.827512 | 2.536446  | -1.349662 |
| 1  | 0.255927  | 1.576865  | 2.097209  |
| 1  | 0.490731  | 3.166927  | 1.331560  |
| 1  | -1.094479 | 2.356165  | 1.214547  |
| 9  | 2.333914  | -0.199090 | 1.358397  |
| 9  | 2.529992  | -0.099630 | -1.192455 |
| 9  | 1.458648  | -2.105500 | -0.057232 |
| 14 | -1.640163 | -0.440234 | -0.030184 |
| 6  | -2.214242 | -0.630454 | 1.749250  |
| 1  | -3.210355 | -1.091044 | 1.780886  |
| 1  | -1.531985 | -1.277046 | 2.314751  |
| 1  | -2.276590 | 0.330742  | 2.272137  |
| 6  | -1.619972 | -2.117029 | -0.863271 |
| 1  | -1.278367 | -2.040655 | -1.902059 |
| 1  | -0.966753 | -2.826891 | -0.347152 |
| 1  | -2.635805 | -2.532534 | -0.871218 |
| 6  | -2.817841 | 0.708679  | -0.936897 |
| 1  | -2.522739 | 0.852918  | -1.982132 |
| 1  | -3.818253 | 0.255845  | -0.931836 |
| 1  | -2.904745 | 1.693462  | -0.464249 |

**F<sub>3</sub>SiN(SiMe<sub>3</sub>)NMe<sub>2</sub> (2d), MP2/6-311G(d,p)**

E(MP2)=-1185.5016316 au

|    |           |           |           |
|----|-----------|-----------|-----------|
| 14 | 0.598646  | -0.721890 | -0.022541 |
| 7  | -0.757674 | 0.279342  | -0.122790 |
| 7  | 0.042937  | 1.493222  | 0.021297  |
| 6  | -0.008980 | 2.326093  | -1.176788 |
| 6  | -0.273971 | 2.225225  | 1.241212  |
| 1  | 0.236837  | 1.706871  | -2.039912 |
| 1  | 0.746083  | 3.110760  | -1.075996 |
| 1  | -0.992799 | 2.790731  | -1.324599 |
| 1  | -0.184126 | 1.547695  | 2.091350  |
| 1  | 0.450303  | 3.036588  | 1.352688  |
| 1  | -1.286955 | 2.655965  | 1.218639  |
| 9  | 1.414539  | -0.614072 | 1.347466  |
| 9  | 1.641343  | -0.528577 | -1.216381 |
| 9  | 0.141437  | -2.256834 | -0.103245 |
| 14 | -2.519578 | 0.094747  | -0.036789 |
| 6  | -3.114270 | 0.064350  | 1.742270  |
| 1  | -4.190856 | -0.137201 | 1.778179  |
| 1  | -2.609536 | -0.725079 | 2.308515  |

|   |           |           |           |
|---|-----------|-----------|-----------|
| 1 | -2.936916 | 1.013433  | 2.256244  |
| 6 | -2.896639 | -1.542807 | -0.853785 |
| 1 | -2.571086 | -1.546626 | -1.898077 |
| 1 | -2.402730 | -2.374289 | -0.346000 |
| 1 | -3.976959 | -1.722531 | -0.833651 |
| 6 | -3.376080 | 1.491150  | -0.949630 |
| 1 | -3.046500 | 1.555103  | -1.990392 |
| 1 | -4.455096 | 1.298470  | -0.950952 |
| 1 | -3.220349 | 2.465442  | -0.477409 |

**F<sub>3</sub>SiN(SiMe<sub>3</sub>)NMe<sub>2</sub> (2d)**, MP2/aug-cc-pVTZ  
E(MP2)= -1186.0292308 au

|    |           |           |           |
|----|-----------|-----------|-----------|
| 14 | 1.569735  | -0.503485 | 0.002772  |
| 7  | 0.010942  | 0.140215  | -0.135228 |
| 7  | 0.505663  | 1.509498  | 0.029031  |
| 6  | 0.277968  | 2.305899  | -1.169943 |
| 6  | -0.021872 | 2.141926  | 1.227818  |
| 1  | 0.695266  | 1.780004  | -2.024579 |
| 1  | 0.798054  | 3.255685  | -1.048716 |
| 1  | -0.784846 | 2.500264  | -1.343586 |
| 1  | 0.196527  | 1.513578  | 2.088168  |
| 1  | 0.472578  | 3.104377  | 1.353964  |
| 1  | -1.104255 | 2.309405  | 1.163204  |
| 9  | 2.291192  | -0.215840 | 1.394581  |
| 9  | 2.562393  | -0.049272 | -1.156167 |
| 9  | 1.501307  | -2.097962 | -0.100699 |
| 14 | -1.661048 | -0.436393 | -0.040424 |
| 6  | -2.253002 | -0.540178 | 1.739398  |
| 1  | -3.240801 | -1.003896 | 1.778304  |
| 1  | -1.572569 | -1.149784 | 2.335574  |
| 1  | -2.326517 | 0.441731  | 2.206418  |
| 6  | -1.637034 | -2.144326 | -0.800150 |
| 1  | -1.306009 | -2.107731 | -1.837924 |
| 1  | -0.971347 | -2.812904 | -0.255929 |
| 1  | -2.642502 | -2.568245 | -0.776049 |
| 6  | -2.799214 | 0.706880  | -1.000187 |
| 1  | -2.479956 | 0.810301  | -2.037104 |
| 1  | -3.806089 | 0.283671  | -0.996782 |
| 1  | -2.860475 | 1.700310  | -0.555500 |

**F<sub>3</sub>SiN(SiMe<sub>3</sub>)NMe<sub>2</sub> (2d)**, SCS-MP2/6-311G(d,p)  
E(SCS-MP2)= -1185.4685295 au

|    |          |           |           |
|----|----------|-----------|-----------|
| 14 | 1.560706 | -0.520260 | 0.000954  |
| 7  | 0.018108 | 0.161624  | -0.106982 |
| 7  | 0.513595 | 1.534286  | 0.023043  |
| 6  | 0.274389 | 2.321194  | -1.188603 |
| 6  | 0.029268 | 2.188501  | 1.237363  |
| 1  | 0.658645 | 1.764836  | -2.045420 |
| 1  | 0.830420 | 3.259797  | -1.096371 |

|    |           |           |           |
|----|-----------|-----------|-----------|
| 1  | -0.789514 | 2.548261  | -1.343724 |
| 1  | 0.274334  | 1.561568  | 2.097118  |
| 1  | 0.544103  | 3.149125  | 1.337475  |
| 1  | -1.057152 | 2.370622  | 1.211898  |
| 9  | 2.332669  | -0.217402 | 1.366490  |
| 9  | 2.536582  | -0.112013 | -1.194569 |
| 9  | 1.452410  | -2.118177 | -0.062271 |
| 14 | -1.656952 | -0.427244 | -0.030675 |
| 6  | -2.238374 | -0.597121 | 1.750056  |
| 1  | -3.239351 | -1.046056 | 1.781273  |
| 1  | -1.565542 | -1.247159 | 2.321731  |
| 1  | -2.291912 | 0.367821  | 2.265792  |
| 6  | -1.651755 | -2.111576 | -0.851378 |
| 1  | -1.313723 | -2.045362 | -1.891341 |
| 1  | -1.000623 | -2.820313 | -0.331964 |
| 1  | -2.669593 | -2.520952 | -0.851705 |
| 6  | -2.816780 | 0.732311  | -0.949735 |
| 1  | -2.514057 | 0.866721  | -1.993576 |
| 1  | -3.822766 | 0.293113  | -0.947785 |
| 1  | -2.893166 | 1.720137  | -0.482797 |

**F<sub>3</sub>SiN(SiMe<sub>3</sub>)NMe<sub>2</sub> (2d)**, SCS-MP2/aug-cc-pVTZ  
E(SCS-MP2)= -1186.0069428 au

|    |           |           |           |
|----|-----------|-----------|-----------|
| 14 | 1.573203  | -0.505649 | 0.003261  |
| 7  | 0.018590  | 0.152308  | -0.123684 |
| 7  | 0.495125  | 1.532613  | 0.028998  |
| 6  | 0.256270  | 2.321487  | -1.178029 |
| 6  | -0.036080 | 2.169425  | 1.229121  |
| 1  | 0.674273  | 1.792669  | -2.031305 |
| 1  | 0.772298  | 3.275264  | -1.064411 |
| 1  | -0.807852 | 2.510683  | -1.351178 |
| 1  | 0.195347  | 1.550473  | 2.093552  |
| 1  | 0.448921  | 3.138731  | 1.344939  |
| 1  | -1.120955 | 2.325029  | 1.171599  |
| 9  | 2.307743  | -0.211608 | 1.384999  |
| 9  | 2.558954  | -0.057145 | -1.161781 |
| 9  | 1.495186  | -2.098112 | -0.093150 |
| 14 | -1.650423 | -0.443702 | -0.037452 |
| 6  | -2.246092 | -0.566009 | 1.745029  |
| 1  | -3.231044 | -1.038764 | 1.779476  |
| 1  | -1.561767 | -1.174626 | 2.339853  |
| 1  | -2.329426 | 0.412194  | 2.220778  |
| 6  | -1.623104 | -2.151572 | -0.810096 |
| 1  | -1.272552 | -2.112759 | -1.842634 |
| 1  | -0.976323 | -2.833866 | -0.258620 |
| 1  | -2.634531 | -2.565273 | -0.809071 |
| 6  | -2.807720 | 0.690455  | -0.994378 |
| 1  | -2.495266 | 0.799062  | -2.034000 |
| 1  | -3.809565 | 0.252586  | -0.987882 |
| 1  | -2.883078 | 1.684141  | -0.550117 |

**ClH<sub>2</sub>SiONMe<sub>2</sub>, gauche- (2e), CCSD/6-311G(d,p)**  
E(CCSD)=-959.2063619 au

|    |           |           |           |
|----|-----------|-----------|-----------|
| 14 | 0.920388  | -0.976681 | 0.087609  |
| 8  | -0.544460 | -0.544756 | 0.735399  |
| 7  | -1.269339 | 0.193154  | -0.284049 |
| 17 | 2.141687  | 0.654378  | -0.201657 |
| 1  | 1.552233  | -1.822474 | 1.104502  |
| 1  | 0.772244  | -1.641571 | -1.210265 |
| 6  | -2.500689 | -0.562027 | -0.503025 |
| 6  | -1.553080 | 1.499660  | 0.307880  |
| 1  | -3.104846 | -0.018910 | -1.236591 |
| 1  | -2.249153 | -1.545348 | -0.908207 |
| 1  | -3.067984 | -0.686484 | 0.431364  |
| 1  | -2.139009 | 2.076063  | -0.415144 |
| 1  | -2.113494 | 1.400222  | 1.249388  |
| 1  | -0.610470 | 2.017065  | 0.496670  |

**ClH<sub>2</sub>SiONMe<sub>2</sub>, gauche- (2e), MP2/6-311G(d,p)**  
E(MP2)=-959.1446701 au

|    |           |           |           |
|----|-----------|-----------|-----------|
| 14 | 0.902225  | -0.970077 | 0.085885  |
| 8  | -0.555437 | -0.556142 | 0.774653  |
| 7  | -1.258944 | 0.186420  | -0.271271 |
| 17 | 2.102763  | 0.667830  | -0.224649 |
| 1  | 1.563835  | -1.809234 | 1.089136  |
| 1  | 0.733209  | -1.637431 | -1.207153 |
| 6  | -2.488100 | -0.561393 | -0.505355 |
| 6  | -1.544990 | 1.492975  | 0.311166  |
| 1  | -3.074365 | -0.018835 | -1.251294 |
| 1  | -2.236021 | -1.547058 | -0.899409 |
| 1  | -3.069830 | -0.675324 | 0.419917  |
| 1  | -2.112462 | 2.068778  | -0.424443 |
| 1  | -2.123478 | 1.397710  | 1.240540  |
| 1  | -0.604378 | 2.004072  | 0.516150  |

**ClH<sub>2</sub>SiONMe<sub>2</sub>, gauche- (2e), MP2/aug-cc-pVTZ**  
E(MP2)= -959.4170667 au

|    |           |           |           |
|----|-----------|-----------|-----------|
| 14 | 0.878806  | -0.989970 | 0.078541  |
| 8  | -0.569199 | -0.599660 | 0.808494  |
| 7  | -1.211674 | 0.188700  | -0.255065 |
| 17 | 2.051225  | 0.680709  | -0.231288 |
| 1  | 1.581259  | -1.846248 | 1.048703  |
| 1  | 0.680212  | -1.645672 | -1.222375 |
| 6  | -2.451231 | -0.513734 | -0.544846 |
| 6  | -1.469944 | 1.490294  | 0.341358  |
| 1  | -2.991345 | 0.059493  | -1.297131 |

|   |           |           |           |
|---|-----------|-----------|-----------|
| 1 | -2.219151 | -1.497322 | -0.945708 |
| 1 | -3.066603 | -0.620758 | 0.354512  |
| 1 | -1.990585 | 2.096520  | -0.398893 |
| 1 | -2.082964 | 1.397183  | 1.243850  |
| 1 | -0.522573 | 1.961357  | 0.587796  |

**ClH<sub>2</sub>SiONMe<sub>2</sub>, gauche- (2e), SCS-MP2/6-311G(d,p)**

E(SCS-MP2)= -959.1368831 au

|    |           |           |           |
|----|-----------|-----------|-----------|
| 14 | 0.911107  | -0.969508 | 0.089499  |
| 8  | -0.551671 | -0.546434 | 0.761411  |
| 7  | -1.275714 | 0.187788  | -0.279659 |
| 17 | 2.120889  | 0.667524  | -0.223685 |
| 1  | 1.561836  | -1.803767 | 1.103073  |
| 1  | 0.752927  | -1.643893 | -1.201067 |
| 6  | -2.505939 | -0.574487 | -0.494029 |
| 6  | -1.567307 | 1.497210  | 0.306975  |
| 1  | -3.108104 | -0.038723 | -1.234137 |
| 1  | -2.249542 | -1.559803 | -0.889582 |
| 1  | -3.074541 | -0.691659 | 0.439853  |
| 1  | -2.150382 | 2.066998  | -0.423063 |
| 1  | -2.132645 | 1.399442  | 1.245051  |
| 1  | -0.627319 | 2.017242  | 0.498179  |

**ClH<sub>2</sub>SiONMe<sub>2</sub>, gauche- (2e), SCS-MP2/aug-cc-pVTZ**

E(SCS-MP2)= -959.4141638 au

|    |           |           |           |
|----|-----------|-----------|-----------|
| 14 | 0.895493  | -0.985697 | 0.085782  |
| 8  | -0.561275 | -0.582364 | 0.786138  |
| 7  | -1.239970 | 0.190241  | -0.267127 |
| 17 | 2.080024  | 0.680023  | -0.230441 |
| 1  | 1.576818  | -1.833877 | 1.076505  |
| 1  | 0.715626  | -1.653003 | -1.211572 |
| 6  | -2.478086 | -0.537286 | -0.527239 |
| 6  | -1.511302 | 1.493337  | 0.333623  |
| 1  | -3.044569 | 0.024392  | -1.269962 |
| 1  | -2.236952 | -1.518301 | -0.931002 |
| 1  | -3.072780 | -0.653071 | 0.385249  |
| 1  | -2.058707 | 2.087439  | -0.398249 |
| 1  | -2.103232 | 1.393751  | 1.249821  |
| 1  | -0.567202 | 1.982966  | 0.558234  |

**ClH<sub>2</sub>SiONMe<sub>2</sub>, anti- (2f), CCSD/6-311G(d,p)**

E(CCSD)=-959.205623 au

|    |           |           |           |
|----|-----------|-----------|-----------|
| 14 | 0.629206  | -0.755772 | 0.000000  |
| 8  | -0.625817 | 0.345575  | 0.000000  |
| 7  | 0.184776  | 1.554678  | 0.000000  |
| 17 | -0.258000 | -2.614170 | 0.000000  |
| 1  | 1.432518  | -0.666817 | 1.223121  |
| 1  | 1.432518  | -0.666817 | -1.223121 |
| 6  | -0.188688 | 2.286865  | -1.208410 |

|   |           |          |           |
|---|-----------|----------|-----------|
| 6 | -0.188688 | 2.286865 | 1.208410  |
| 1 | 0.072401  | 1.687034 | -2.083306 |
| 1 | 0.381726  | 3.220850 | -1.231325 |
| 1 | -1.266427 | 2.503461 | -1.223111 |
| 1 | 0.072401  | 1.687034 | 2.083306  |
| 1 | 0.381726  | 3.220850 | 1.231325  |
| 1 | -1.266427 | 2.503461 | 1.223111  |

**CIH<sub>2</sub>SiONMe<sub>2</sub>, anti- (2f), MP2/6-311G(d,p)**  
E(MP2)=-959.144603 au

|    |           |           |           |
|----|-----------|-----------|-----------|
| 14 | 0.612904  | -0.696439 | 0.000000  |
| 8  | -0.711753 | 0.333682  | 0.000000  |
| 7  | 0.155212  | 1.518058  | 0.000000  |
| 17 | -0.181154 | -2.600692 | 0.000000  |
| 1  | 1.403127  | -0.587269 | 1.228659  |
| 1  | 1.403127  | -0.587269 | -1.228659 |
| 6  | -0.181154 | 2.262755  | -1.208035 |
| 6  | -0.181154 | 2.262755  | 1.208035  |
| 1  | 0.051048  | 1.649256  | -2.079188 |
| 1  | 0.432287  | 3.166972  | -1.230694 |
| 1  | -1.246298 | 2.527531  | -1.220422 |
| 1  | 0.051048  | 1.649256  | 2.079188  |
| 1  | 0.432287  | 3.166972  | 1.230694  |
| 1  | -1.246298 | 2.527531  | 1.220422  |

**CIH<sub>2</sub>SiONMe<sub>2</sub>, anti- (2f), MP2/aug-cc-pVTZ**  
E(MP2)= -959.41826 au

|    |           |           |           |
|----|-----------|-----------|-----------|
| 14 | 0.596231  | -0.652463 | 0.000000  |
| 8  | -0.776105 | 0.321138  | 0.000000  |
| 7  | 0.141324  | 1.478221  | 0.000000  |
| 17 | -0.157310 | -2.588628 | 0.000000  |
| 1  | 1.383569  | -0.530441 | 1.236442  |
| 1  | 1.383569  | -0.530441 | -1.236442 |
| 6  | -0.157310 | 2.231171  | -1.207982 |
| 6  | -0.157310 | 2.231171  | 1.207982  |
| 1  | 0.047381  | 1.607868  | -2.074272 |
| 1  | 0.491638  | 3.105554  | -1.230209 |
| 1  | -1.205422 | 2.542244  | -1.219370 |
| 1  | 0.047381  | 1.607868  | 2.074272  |
| 1  | 0.491638  | 3.105554  | 1.230209  |
| 1  | -1.205422 | 2.542244  | 1.219370  |

**CIH<sub>2</sub>SiONMe<sub>2</sub>, anti- (2f), SCS-MP2/6-311G(d,p)**  
E(SCS-MP2)= -959.1365312 au

|    |           |           |          |
|----|-----------|-----------|----------|
| 14 | 0.631705  | -0.722186 | 0.000000 |
| 8  | -0.667578 | 0.337165  | 0.000000 |
| 7  | 0.167034  | 1.547531  | 0.000000 |
| 17 | -0.201428 | -2.610614 | 0.000000 |

|   |           |           |           |
|---|-----------|-----------|-----------|
| 1 | 1.428785  | -0.618937 | 1.224596  |
| 1 | 1.428785  | -0.618937 | -1.224596 |
| 6 | -0.201428 | 2.283254  | -1.210459 |
| 6 | -0.201428 | 2.283254  | 1.210459  |
| 1 | 0.051221  | 1.678846  | -2.083834 |
| 1 | 0.380527  | 3.209640  | -1.233573 |
| 1 | -1.276065 | 2.511423  | -1.221770 |
| 1 | 0.051221  | 1.678846  | 2.083834  |
| 1 | 0.380527  | 3.209640  | 1.233573  |
| 1 | -1.276065 | 2.511423  | 1.221770  |

**ClH<sub>2</sub>SiONMe<sub>2</sub>, anti- (2f), SCS-MP2/aug-cc-pVTZ**  
E(SCS-MP2)=-959.4148754 au

|    |           |           |           |
|----|-----------|-----------|-----------|
| 14 | 0.612180  | -0.680758 | 0.000000  |
| 8  | -0.731262 | 0.325527  | 0.000000  |
| 7  | 0.153336  | 1.508910  | 0.000000  |
| 17 | -0.176538 | -2.601905 | 0.000000  |
| 1  | 1.406602  | -0.558965 | 1.231022  |
| 1  | 1.406602  | -0.558965 | -1.231022 |
| 6  | -0.176538 | 2.255432  | -1.210156 |
| 6  | -0.176538 | 2.255432  | 1.210156  |
| 1  | 0.048930  | 1.641156  | -2.078621 |
| 1  | 0.442548  | 3.152199  | -1.232122 |
| 1  | -1.235164 | 2.531221  | -1.221481 |
| 1  | 0.048930  | 1.641156  | 2.078621  |
| 1  | 0.442548  | 3.152199  | 1.232122  |
| 1  | -1.235164 | 2.531221  | 1.221481  |

**(CF<sub>3</sub>)F<sub>2</sub>SiONMe<sub>2</sub>, gauche- (2g), CCSD/6-311G(d,p)**  
E(CCSD)=-1034.812434 au

|    |           |           |           |
|----|-----------|-----------|-----------|
| 14 | 0.191123  | 0.876568  | -0.143240 |
| 9  | -0.060521 | 1.644965  | 1.226425  |
| 8  | -1.185956 | 0.511402  | -0.960438 |
| 7  | -1.596949 | -0.426232 | 0.091413  |
| 6  | -2.832156 | 0.105294  | 0.668386  |
| 1  | -3.606963 | 0.211323  | -0.102561 |
| 1  | -2.625350 | 1.074912  | 1.124034  |
| 1  | -3.164411 | -0.591808 | 1.443275  |
| 6  | -1.805960 | -1.719061 | -0.560510 |
| 1  | -2.589588 | -1.644624 | -1.326408 |
| 1  | -0.873349 | -2.046447 | -1.020757 |
| 1  | -2.097827 | -2.437587 | 0.210892  |
| 9  | 1.009315  | 1.876852  | -1.072218 |
| 6  | 1.409435  | -0.567767 | 0.171823  |
| 9  | 1.531167  | -1.340227 | -0.930817 |
| 9  | 2.634394  | -0.093948 | 0.456304  |
| 9  | 1.057183  | -1.379277 | 1.179774  |

**(CF<sub>3</sub>)F<sub>2</sub>SiONMe<sub>2</sub>, gauche- (2g), MP2/6-311G(d,p)**  
E(MP2)=-1034.7753796 au

|    |           |           |           |
|----|-----------|-----------|-----------|
| 14 | 0.118286  | 0.836848  | -0.143067 |
| 9  | -0.143856 | 1.621588  | 1.226749  |
| 8  | -1.233653 | 0.561304  | -1.066595 |
| 7  | -1.570546 | -0.367161 | 0.038985  |
| 6  | -2.792802 | 0.127929  | 0.668297  |
| 1  | -3.608517 | 0.159523  | -0.062632 |
| 1  | -2.609286 | 1.123061  | 1.069858  |
| 1  | -3.041254 | -0.551675 | 1.486567  |
| 6  | -1.745275 | -1.693126 | -0.548530 |
| 1  | -2.580472 | -1.682800 | -1.257964 |
| 1  | -0.830921 | -1.984308 | -1.061463 |
| 1  | -1.942791 | -2.394195 | 0.265177  |
| 9  | 1.007557  | 1.843001  | -1.017294 |
| 6  | 1.342868  | -0.604984 | 0.165350  |
| 9  | 1.533268  | -1.330321 | -0.966216 |
| 9  | 2.548236  | -0.138459 | 0.540667  |
| 9  | 0.942743  | -1.471888 | 1.117488  |

**(CF<sub>3</sub>)F<sub>2</sub>SiONMe<sub>2</sub>, gauche- (2g), MP2/aug-cc-pVTZ**  
E(MP2) = -1035.3472216 au

|    |           |           |           |
|----|-----------|-----------|-----------|
| 14 | -0.086051 | -0.837710 | -0.138063 |
| 9  | 0.181737  | -1.606465 | 1.234604  |
| 8  | 1.250359  | -0.550523 | -1.087083 |
| 7  | 1.550423  | 0.379655  | 0.037718  |
| 6  | 2.783413  | -0.081700 | 0.663966  |
| 1  | 3.597632  | -0.073020 | -0.063168 |
| 1  | 2.636734  | -1.084757 | 1.050771  |
| 1  | 3.007379  | 0.594852  | 1.486819  |
| 6  | 1.687291  | 1.712219  | -0.536552 |
| 1  | 2.517982  | 1.727324  | -1.244831 |
| 1  | 0.767323  | 1.987431  | -1.041538 |
| 1  | 1.873572  | 2.406856  | 0.280283  |
| 9  | -0.963929 | -1.861117 | -0.999088 |
| 6  | -1.351194 | 0.585771  | 0.158571  |
| 9  | -1.574777 | 1.293316  | -0.977303 |
| 9  | -2.541475 | 0.098298  | 0.555546  |
| 9  | -0.964755 | 1.477982  | 1.095271  |

**(CF<sub>3</sub>)F<sub>2</sub>SiONMe<sub>2</sub>, gauche- (2g), SCS-MP2/6-311G(d,p)**  
E(SCS-MP2)= -1034.7176377 au

|    |           |           |           |
|----|-----------|-----------|-----------|
| 14 | 0.142316  | 0.842405  | -0.145008 |
| 9  | -0.106475 | 1.626630  | 1.225402  |
| 8  | -1.220547 | 0.562689  | -1.043308 |
| 7  | -1.597153 | -0.364049 | 0.053601  |
| 6  | -2.821316 | 0.164995  | 0.662765  |



|   |           |           |           |
|---|-----------|-----------|-----------|
| 1 | -3.622438 | 0.229120  | -0.083724 |
| 1 | -2.615455 | 1.151691  | 1.077586  |
| 1 | -3.108070 | -0.514084 | 1.470557  |
| 6 | -1.805014 | -1.681584 | -0.554144 |
| 1 | -2.624255 | -1.639115 | -1.282490 |
| 1 | -0.888450 | -1.998984 | -1.049851 |
| 1 | -2.044126 | -2.383589 | 0.249252  |
| 9 | 1.029238  | 1.834843  | -1.034009 |
| 6 | 1.346503  | -0.618628 | 0.166498  |
| 9 | 1.514403  | -1.356954 | -0.961633 |
| 9 | 2.564569  | -0.164127 | 0.523650  |
| 9 | 0.946462  | -1.471567 | 1.132071  |

**(CF<sub>3</sub>)F<sub>2</sub>SiONMe<sub>2</sub>, gauche- (2g), SCS-MP2/aug-cc-pVTZ**  
E(SCS-MP2)= -1035.2952203 au

|    |           |           |           |
|----|-----------|-----------|-----------|
| 14 | -0.100986 | -0.840697 | -0.140064 |
| 9  | 0.156666  | -1.608468 | 1.232502  |
| 8  | 1.241429  | -0.553190 | -1.072168 |
| 7  | 1.569745  | 0.376898  | 0.046424  |
| 6  | 2.805344  | -0.107677 | 0.662181  |
| 1  | 3.612634  | -0.120456 | -0.073380 |
| 1  | 2.642506  | -1.106081 | 1.056292  |
| 1  | 3.052415  | 0.568692  | 1.479506  |
| 6  | 1.731265  | 1.707048  | -0.540397 |
| 1  | 2.552935  | 1.701055  | -1.260053 |
| 1  | 0.810656  | 2.000262  | -1.035092 |
| 1  | 1.943896  | 2.402135  | 0.270552  |
| 9  | -0.977751 | -1.855047 | -1.009175 |
| 6  | -1.355153 | 0.594964  | 0.159034  |
| 9  | -1.568039 | 1.310944  | -0.974468 |
| 9  | -2.552662 | 0.111698  | 0.545683  |
| 9  | -0.970395 | 1.479249  | 1.104406  |

**(CF<sub>3</sub>)F<sub>2</sub>SiONMe<sub>2</sub>, anti- (2h), CCSD/6-311G(d,p)**  
E(CCSD)=-1034.810591 au

|    |           |           |           |
|----|-----------|-----------|-----------|
| 14 | -0.500871 | 0.231870  | 0.000000  |
| 6  | -1.160807 | -1.560227 | 0.000000  |
| 9  | -1.085808 | 0.951017  | 1.288439  |
| 9  | -0.744649 | -2.240167 | 1.082856  |
| 9  | -2.505060 | -1.593933 | 0.000000  |
| 8  | 1.128652  | 0.122469  | 0.000000  |
| 7  | 1.521354  | 1.534109  | 0.000000  |
| 6  | 2.319639  | 1.715511  | 1.211130  |
| 1  | 3.181359  | 1.033369  | 1.227543  |
| 1  | 1.687629  | 1.533500  | 2.082729  |
| 1  | 2.663089  | 2.754285  | 1.229545  |
| 9  | -1.085808 | 0.951017  | -1.288439 |
| 9  | -0.744649 | -2.240167 | -1.082856 |
| 6  | 2.319639  | 1.715511  | -1.211130 |
| 1  | 3.181359  | 1.033369  | -1.227543 |

|   |          |          |           |
|---|----------|----------|-----------|
| 1 | 1.687629 | 1.533500 | -2.082729 |
| 1 | 2.663089 | 2.754285 | -1.229545 |

**(CF<sub>3</sub>)F<sub>2</sub>SiONMe<sub>2</sub>, anti- (2h), CCSD/6-311++G(d,p)**  
E(CCSD)= -1034.8454047 au

|    |           |           |           |
|----|-----------|-----------|-----------|
| 14 | 0.333229  | 0.375704  | 0.000000  |
| 6  | -1.286713 | 1.397939  | 0.000000  |
| 9  | 1.163586  | 0.799106  | 1.287096  |
| 9  | -2.040355 | 1.132470  | 1.083678  |
| 9  | -1.043492 | 2.721919  | 0.000000  |
| 8  | -0.120650 | -1.193786 | 0.000000  |
| 7  | 1.166471  | -1.894944 | 0.000000  |
| 6  | 1.163586  | -2.716216 | 1.210421  |
| 1  | 0.311925  | -3.411654 | 1.219777  |
| 1  | 1.116708  | -2.064435 | 2.085666  |
| 1  | 2.103965  | -3.275734 | 1.231738  |
| 9  | 1.163586  | 0.799106  | -1.287096 |
| 9  | -2.040355 | 1.132470  | -1.083678 |
| 6  | 1.163586  | -2.716216 | -1.210421 |
| 1  | 0.311925  | -3.411654 | -1.219777 |
| 1  | 1.116708  | -2.064435 | -2.085666 |
| 1  | 2.103965  | -3.275734 | -1.231738 |

**(CF<sub>3</sub>)F<sub>2</sub>SiONMe<sub>2</sub>, anti- (2h), MP2/6-311G(d,p)**  
E(MP2)= -1034.7723229 au

|    |           |           |           |
|----|-----------|-----------|-----------|
| 14 | -0.257860 | 0.254312  | 0.000000  |
| 6  | -1.151235 | -1.437099 | 0.000000  |
| 9  | -0.821301 | 0.961071  | 1.320991  |
| 9  | -0.821301 | -2.172285 | 1.086091  |
| 9  | -2.494842 | -1.313611 | 0.000000  |
| 8  | 1.352405  | -0.160290 | 0.000000  |
| 7  | 1.509385  | 1.316315  | 0.000000  |
| 6  | 2.229980  | 1.676257  | 1.217514  |
| 1  | 3.215292  | 1.197345  | 1.230710  |
| 1  | 1.647230  | 1.358896  | 2.080776  |
| 1  | 2.334067  | 2.763561  | 1.232123  |
| 9  | -0.821301 | 0.961071  | -1.320991 |
| 9  | -0.821301 | -2.172285 | -1.086091 |
| 6  | 2.229980  | 1.676257  | -1.217514 |
| 1  | 3.215292  | 1.197345  | -1.230710 |
| 1  | 1.647230  | 1.358896  | -2.080776 |
| 1  | 2.334067  | 2.763561  | -1.232123 |

**(CF<sub>3</sub>)F<sub>2</sub>SiONMe<sub>2</sub>, anti- (2h), MP2/aug-cc-pVTZ**  
E(MP2)= -1035.3448811 au

|    |           |           |          |
|----|-----------|-----------|----------|
| 14 | -0.235457 | 0.268172  | 0.000000 |
| 6  | -1.136898 | -1.432609 | 0.000000 |
| 9  | -0.813670 | 0.951023  | 1.322907 |

|   |           |           |           |
|---|-----------|-----------|-----------|
| 9 | -0.813670 | -2.173869 | 1.084961  |
| 9 | -2.482260 | -1.309687 | 0.000000  |
| 8 | 1.373937  | -0.184510 | 0.000000  |
| 7 | 1.479518  | 1.305101  | 0.000000  |
| 6 | 2.188481  | 1.687285  | 1.214359  |
| 1 | 3.185463  | 1.243577  | 1.217576  |
| 1 | 1.625399  | 1.349250  | 2.078003  |
| 1 | 2.259303  | 2.773479  | 1.228586  |
| 9 | -0.813670 | 0.951023  | -1.322907 |
| 9 | -0.813670 | -2.173869 | -1.084961 |
| 6 | 2.188481  | 1.687285  | -1.214359 |
| 1 | 3.185463  | 1.243577  | -1.217576 |
| 1 | 1.625399  | 1.349250  | -2.078003 |
| 1 | 2.259303  | 2.773479  | -1.228586 |

**(CF<sub>3</sub>)F<sub>2</sub>SiONMe<sub>2</sub>, anti- (2h), SCS-MP2/6-311G(d,p)**

E(SCS-MP2)= -1034.7151264 au

|    |           |           |           |
|----|-----------|-----------|-----------|
| 14 | -0.320883 | -0.331269 | 0.000000  |
| 6  | 1.248797  | -1.423197 | 0.000000  |
| 9  | -1.154052 | -0.730611 | 1.297188  |
| 9  | 2.015717  | -1.189577 | 1.087165  |
| 9  | 0.945998  | -2.739134 | 0.000000  |
| 8  | 0.213896  | 1.222077  | 0.000000  |
| 7  | -1.117509 | 1.868728  | 0.000000  |
| 6  | -1.154052 | 2.686200  | 1.213408  |
| 1  | -0.330820 | 3.413197  | 1.227440  |
| 1  | -1.085047 | 2.030921  | 2.083145  |
| 1  | -2.116310 | 3.206094  | 1.231833  |
| 9  | -1.154052 | -0.730611 | -1.297188 |
| 9  | 2.015717  | -1.189577 | -1.087165 |
| 6  | -1.154052 | 2.686200  | -1.213408 |
| 1  | -0.330820 | 3.413197  | -1.227440 |
| 1  | -1.085047 | 2.030921  | -2.083145 |
| 1  | -2.116310 | 3.206094  | -1.231833 |

**(CF<sub>3</sub>)F<sub>2</sub>SiONMe<sub>2</sub>, anti- (2h), SCS-MP2/aug-cc-pVTZ**

E(SCS-MP2)= -1035.293232 au

|    |           |           |           |
|----|-----------|-----------|-----------|
| 14 | -0.242687 | 0.265841  | 0.000000  |
| 6  | -1.143157 | -1.438366 | 0.000000  |
| 9  | -0.818678 | 0.952818  | 1.319171  |
| 9  | -0.818678 | -2.180416 | 1.085917  |
| 9  | -2.489191 | -1.317402 | 0.000000  |
| 8  | 1.365229  | -0.172070 | 0.000000  |
| 7  | 1.489890  | 1.317525  | 0.000000  |
| 6  | 2.208965  | 1.689980  | 1.217796  |
| 1  | 3.200176  | 1.232276  | 1.221782  |
| 1  | 1.641202  | 1.359889  | 2.082298  |
| 1  | 2.295149  | 2.775797  | 1.232068  |
| 9  | -0.818678 | 0.952818  | -1.319171 |

|   |           |           |           |
|---|-----------|-----------|-----------|
| 9 | -0.818678 | -2.180416 | -1.085917 |
| 6 | 2.208965  | 1.689980  | -1.217796 |
| 1 | 3.200176  | 1.232276  | -1.221782 |
| 1 | 1.641202  | 1.359889  | -2.082298 |
| 1 | 2.295149  | 2.775797  | -1.232068 |

**F<sub>3</sub>SiONMe<sub>2</sub> (2i), CCSD/6-311G(d,p)**

E(CCSD)= -797.5273531 au

|    |           |           |           |
|----|-----------|-----------|-----------|
| 7  | -0.552360 | 1.306859  | 0.000000  |
| 14 | 0.275516  | -0.941021 | 0.000000  |
| 9  | 1.594569  | -1.814337 | 0.000000  |
| 9  | -0.560453 | -1.337071 | 1.283755  |
| 9  | -0.560453 | -1.337071 | -1.283755 |
| 8  | 0.741076  | 0.623365  | 0.000000  |
| 6  | -0.560453 | 2.124632  | 1.210996  |
| 6  | -0.560453 | 2.124632  | -1.210996 |
| 1  | -1.502852 | 2.680345  | 1.232397  |
| 1  | -0.514167 | 1.466910  | -2.081329 |
| 1  | -1.502852 | 2.680345  | -1.232397 |
| 1  | -0.514167 | 1.466910  | 2.081329  |
| 1  | 0.288599  | 2.822784  | -1.227529 |
| 1  | 0.288599  | 2.822784  | 1.227529  |

**F<sub>3</sub>SiONMe<sub>2</sub> (2i), MP2/6-311G(d,p)**

E(MP2)= -797.4928467 au

|    |           |           |           |
|----|-----------|-----------|-----------|
| 7  | -0.506709 | 1.251290  | 0.000000  |
| 14 | 0.266245  | -0.900171 | 0.000000  |
| 9  | 1.546186  | -1.843450 | 0.000000  |
| 9  | -0.572705 | -1.275560 | 1.295828  |
| 9  | -0.572705 | -1.275560 | -1.295828 |
| 8  | 0.837054  | 0.640813  | 0.000000  |
| 6  | -0.572705 | 2.060861  | 1.210227  |
| 6  | -0.572705 | 2.060861  | -1.210227 |
| 1  | -1.549963 | 2.548959  | 1.230681  |
| 1  | -0.481875 | 1.406439  | -2.076946 |
| 1  | -1.549963 | 2.548959  | -1.230681 |
| 1  | -0.481875 | 1.406439  | 2.076946  |
| 1  | 0.226130  | 2.813436  | -1.225555 |
| 1  | 0.226130  | 2.813436  | 1.225555  |

**F<sub>3</sub>SiONMe<sub>2</sub> (2i), MP2/aug-cc-pVTZ**

E(MP2)= -797.9087611 au

|    |           |           |           |
|----|-----------|-----------|-----------|
| 7  | -0.430851 | 1.166015  | 0.000000  |
| 14 | 0.243607  | -0.828842 | 0.000000  |
| 9  | 1.460325  | -1.858423 | 0.000000  |
| 9  | -0.583370 | -1.196571 | 1.307900  |
| 9  | -0.583370 | -1.196571 | -1.307900 |
| 8  | 0.969170  | 0.660363  | 0.000000  |

|   |           |          |           |
|---|-----------|----------|-----------|
| 6 | -0.583370 | 1.959444 | 1.210086  |
| 6 | -0.583370 | 1.959444 | -1.210086 |
| 1 | -1.599508 | 2.349919 | 1.224852  |
| 1 | -0.430399 | 1.322408 | -2.075627 |
| 1 | -1.599508 | 2.349919 | -1.224852 |
| 1 | -0.430399 | 1.322408 | 2.075627  |
| 1 | 0.135043  | 2.782443 | -1.218742 |
| 1 | 0.135043  | 2.782443 | 1.218742  |

**F<sub>3</sub>SiONMe<sub>2</sub> (2i)**, SCS-MP2/6-311G(d,p)

E(SCS-MP2)= -797.4569128 au

|    |           |           |           |
|----|-----------|-----------|-----------|
| 7  | -0.541411 | 1.288716  | 0.000000  |
| 14 | 0.272840  | -0.928658 | 0.000000  |
| 9  | 1.581114  | -1.828264 | 0.000000  |
| 9  | -0.566230 | -1.317872 | 1.290049  |
| 9  | -0.566230 | -1.317872 | -1.290049 |
| 8  | 0.780583  | 0.630970  | 0.000000  |
| 6  | -0.566230 | 2.106867  | 1.212506  |
| 6  | -0.566230 | 2.106867  | -1.212506 |
| 1  | -1.521720 | 2.639081  | 1.234263  |
| 1  | -0.502996 | 1.449791  | -2.081423 |
| 1  | -1.521720 | 2.639081  | -1.234263 |
| 1  | -0.502996 | 1.449791  | 2.081423  |
| 1  | 0.265885  | 2.824183  | -1.226592 |
| 1  | 0.265885  | 2.824183  | 1.226592  |

**F<sub>3</sub>SiONMe<sub>2</sub> (2i)**, SCS-MP2/aug-cc-pVTZ

E(SCS-MP2)= -797.8775157 au

|    |           |           |           |
|----|-----------|-----------|-----------|
| 7  | -0.494013 | 1.228625  | 0.000000  |
| 14 | 0.262178  | -0.885597 | 0.000000  |
| 9  | 1.523125  | -1.849750 | 0.000000  |
| 9  | -0.575071 | -1.255574 | 1.294016  |
| 9  | -0.575071 | -1.255574 | -1.294016 |
| 8  | 0.872403  | 0.642734  | 0.000000  |
| 6  | -0.575071 | 2.040181  | 1.210603  |
| 6  | -0.575071 | 2.040181  | -1.210603 |
| 1  | -1.557716 | 2.510630  | 1.227279  |
| 1  | -0.472421 | 1.394862  | -2.078930 |
| 1  | -1.557716 | 2.510630  | -1.227279 |
| 1  | -0.472421 | 1.394862  | 2.078930  |
| 1  | 0.206331  | 2.805522  | -1.220818 |
| 1  | 0.206331  | 2.805522  | 1.220818  |

**1-methylsilatrane (1a)**, CCSD/6-311++G(d,p)

E(CCSD)= -844.0526577 au

|    |          |          |           |
|----|----------|----------|-----------|
| 14 | 0.000000 | 0.000000 | 1.169338  |
| 7  | 0.000000 | 0.000000 | -1.398809 |

|   |           |           |           |
|---|-----------|-----------|-----------|
| 6 | 1.242109  | -0.717132 | -1.648028 |
| 6 | 1.513246  | -1.613260 | -0.433573 |
| 8 | 1.365830  | -0.867698 | 0.755432  |
| 1 | 1.215328  | -1.307385 | -2.578720 |
| 1 | 2.052549  | 0.015674  | -1.733424 |
| 1 | 0.816731  | -2.464932 | -0.431466 |
| 1 | 2.534492  | -2.009138 | -0.465929 |
| 6 | -1.242109 | -0.717132 | -1.648028 |
| 6 | -2.153747 | -0.503880 | -0.433573 |
| 8 | -1.434364 | -0.748994 | 0.755432  |
| 1 | -1.739893 | -0.398813 | -2.578720 |
| 1 | -1.012700 | -1.785397 | -1.733424 |
| 1 | -2.543059 | 0.525157  | -0.431466 |
| 1 | -3.007210 | -1.190365 | -0.465929 |
| 6 | 0.000000  | 1.434264  | -1.648028 |
| 6 | 0.640501  | 2.117140  | -0.433573 |
| 8 | 0.068534  | 1.616693  | 0.755432  |
| 1 | 0.524565  | 1.706198  | -2.578720 |
| 1 | -1.039849 | 1.769723  | -1.733424 |
| 1 | 1.726329  | 1.939776  | -0.431466 |
| 1 | 0.472719  | 3.199503  | -0.465929 |
| 6 | 0.000000  | 0.000000  | 3.025358  |
| 1 | -0.784603 | 0.660546  | 3.411949  |
| 1 | 0.964351  | 0.349213  | 3.411949  |
| 1 | -0.179748 | -1.009759 | 3.411949  |

**1-methylsilatrane (1a)**, MP2/aug-cc-pVTZ  
E(MP2)= -844.4016827 au

|    |           |           |           |
|----|-----------|-----------|-----------|
| 14 | 0.000000  | 0.000000  | 1.088398  |
| 7  | 0.000000  | 0.000000  | -1.272661 |
| 6  | 0.459081  | 1.344692  | -1.595647 |
| 6  | -1.394078 | -0.274770 | -1.595647 |
| 6  | 0.934997  | -1.069922 | -1.595647 |
| 6  | 0.000000  | 2.242645  | -0.455016 |
| 6  | -1.942188 | -1.121323 | -0.455016 |
| 6  | 1.942188  | -1.121323 | -0.455016 |
| 8  | 0.310410  | 1.624264  | 0.771438  |
| 8  | -1.561859 | -0.543309 | 0.771438  |
| 8  | 1.251449  | -1.080955 | 0.771438  |
| 1  | 0.090939  | 1.689049  | -2.568956 |
| 1  | -1.508229 | -0.765769 | -2.568956 |
| 1  | 1.417290  | -0.923280 | -2.568956 |
| 1  | 1.549015  | 1.335162  | -1.621405 |
| 1  | -1.930791 | 0.673905  | -1.621405 |
| 1  | 0.381776  | -2.009067 | -1.621405 |
| 1  | -1.077911 | 2.424143  | -0.522501 |
| 1  | -1.560414 | -2.145570 | -0.522501 |
| 1  | 2.638325  | -0.278573 | -0.522501 |
| 1  | 0.505349  | 3.208051  | -0.499419 |
| 1  | -3.030928 | -1.166380 | -0.499419 |
| 1  | 2.525579  | -2.041671 | -0.499419 |

|   |           |           |          |
|---|-----------|-----------|----------|
| 6 | 0.000000  | 0.000000  | 2.951015 |
| 1 | -0.077052 | -1.017266 | 3.333082 |
| 1 | 0.919505  | 0.441904  | 3.333082 |
| 1 | -0.842452 | 0.575362  | 3.333082 |

**1-methylsilatrane (1a), MP2/def2-TZVPP**

E(MP2)= -844.3676258 au

|    |           |           |           |
|----|-----------|-----------|-----------|
| 14 | 0.000000  | 0.000000  | 1.092035  |
| 7  | 0.000000  | 0.000000  | -1.287204 |
| 6  | -0.455276 | 1.346083  | -1.598948 |
| 6  | 0.000000  | 2.234033  | -0.449497 |
| 8  | -0.319945 | 1.611091  | 0.770047  |
| 1  | -0.085860 | 1.701190  | -2.566847 |
| 1  | -1.544201 | 1.339027  | -1.627651 |
| 1  | 1.077929  | 2.410908  | -0.510928 |
| 1  | -0.499014 | 3.201602  | -0.492660 |
| 6  | 1.393380  | -0.278761 | -1.598948 |
| 6  | 1.934729  | -1.117016 | -0.449497 |
| 8  | 1.555218  | -0.528465 | 0.770047  |
| 1  | 1.516203  | -0.776238 | -2.566847 |
| 1  | 1.931732  | 0.667804  | -1.627651 |
| 1  | 1.548943  | -2.138968 | -0.510928 |
| 1  | 3.022175  | -1.168642 | -0.492660 |
| 6  | -0.938104 | -1.067322 | -1.598948 |
| 6  | -1.934729 | -1.117016 | -0.449497 |
| 8  | -1.235273 | -1.082626 | 0.770047  |
| 1  | -1.430343 | -0.924952 | -2.566847 |
| 1  | -0.387531 | -2.006831 | -1.627651 |
| 1  | -2.626873 | -0.271940 | -0.510928 |
| 1  | -2.523162 | -2.032959 | -0.492660 |
| 6  | 0.000000  | 0.000000  | 2.950791  |
| 1  | 0.052551  | -1.017466 | 3.334104  |
| 1  | -0.907427 | 0.463222  | 3.334104  |
| 1  | 0.854876  | 0.554244  | 3.334104  |

**1-methylsilatrane (1a), SCS-MP2/6-311G(d,p)**

E(SCS-MP2)= -843.9070439 au

|    |           |           |           |
|----|-----------|-----------|-----------|
| 14 | 0.000000  | 0.000000  | 1.130881  |
| 7  | 0.000000  | 0.000000  | -1.342692 |
| 6  | 1.240399  | -0.716145 | -1.630378 |
| 6  | 0.000000  | 1.432289  | -1.630378 |
| 6  | -1.240399 | -0.716145 | -1.630378 |
| 6  | 2.176510  | -0.483998 | -0.438425 |
| 6  | -0.669101 | 2.126912  | -0.438425 |
| 6  | -1.507410 | -1.642914 | -0.438425 |
| 8  | 1.473129  | -0.715366 | 0.764615  |
| 8  | -0.117040 | 1.633450  | 0.764615  |
| 8  | -1.356090 | -0.918084 | 0.764615  |
| 1  | 1.701851  | -0.402060 | -2.579903 |
| 1  | -0.502731 | 1.674877  | -2.579903 |

|   |           |           |           |
|---|-----------|-----------|-----------|
| 1 | -1.199120 | -1.272817 | -2.579903 |
| 1 | 1.012991  | -1.785246 | -1.693385 |
| 1 | 1.039573  | 1.769899  | -1.693385 |
| 1 | -2.052564 | 0.015347  | -1.693385 |
| 1 | 2.564774  | 0.544644  | -0.458124 |
| 1 | -1.754062 | 1.948837  | -0.458124 |
| 1 | -0.810711 | -2.493481 | -0.458124 |
| 1 | 3.029109  | -1.170423 | -0.477845 |
| 1 | -0.500938 | 3.208497  | -0.477845 |
| 1 | -2.528171 | -2.038074 | -0.477845 |
| 6 | 0.000000  | 0.000000  | 2.991154  |
| 1 | -0.967267 | 0.336246  | 3.378346  |
| 1 | 0.192435  | -1.005801 | 3.378346  |
| 1 | 0.774831  | 0.669554  | 3.378346  |

**1-methylsilatrane (1a)**, SCS-MP2/aug-cc-pVTZ  
E(SCS-MP2)= -844.3758276 au

|    |           |           |           |
|----|-----------|-----------|-----------|
| 14 | 0.000000  | 0.000000  | 1.115577  |
| 7  | 0.000000  | 0.000000  | -1.316887 |
| 6  | 0.441601  | 1.357453  | -1.616792 |
| 6  | -1.396390 | -0.296289 | -1.616792 |
| 6  | 0.954788  | -1.061165 | -1.616792 |
| 6  | 0.000000  | 2.235481  | -0.447633 |
| 6  | -1.935983 | -1.117740 | -0.447633 |
| 6  | 1.935983  | -1.117740 | -0.447633 |
| 8  | 0.343983  | 1.605503  | 0.768116  |
| 8  | -1.562398 | -0.504853 | 0.768116  |
| 8  | 1.218415  | -1.100649 | 0.768116  |
| 1  | 0.050180  | 1.725968  | -2.573008 |
| 1  | -1.519822 | -0.819526 | -2.573008 |
| 1  | 1.469642  | -0.906441 | -2.573008 |
| 1  | 1.531083  | 1.359324  | -1.669161 |
| 1  | -1.942751 | 0.646295  | -1.669161 |
| 1  | 0.411668  | -2.005619 | -1.669161 |
| 1  | -1.081188 | 2.406589  | -0.486828 |
| 1  | -1.543573 | -2.139631 | -0.486828 |
| 1  | 2.624761  | -0.266958 | -0.486828 |
| 1  | 0.496221  | 3.206483  | -0.486981 |
| 1  | -3.025007 | -1.173502 | -0.486981 |
| 1  | 2.528786  | -2.032982 | -0.486981 |
| 6  | 0.000000  | 0.000000  | 2.980148  |
| 1  | -0.092882 | -1.016727 | 3.364012  |
| 1  | 0.926952  | 0.427925  | 3.364012  |
| 1  | -0.834070 | 0.588801  | 3.364012  |

**1-methylsilatrane (1a)**, SCS-MP2/def2-TZVPP  
E(SCS-MP2)= -844.3404429 au

|    |           |          |           |
|----|-----------|----------|-----------|
| 14 | 0.000000  | 0.000000 | 1.117041  |
| 7  | 0.000000  | 0.000000 | -1.328983 |
| 6  | -0.439216 | 1.358281 | -1.618447 |



|   |           |           |           |
|---|-----------|-----------|-----------|
| 6 | 0.000000  | 2.228103  | -0.442846 |
| 8 | -0.348988 | 1.594278  | 0.767243  |
| 1 | -0.048325 | 1.735566  | -2.570253 |
| 1 | -1.527658 | 1.361803  | -1.671746 |
| 1 | 1.080548  | 2.396796  | -0.478984 |
| 1 | -0.491756 | 3.200244  | -0.480618 |
| 6 | 1.395914  | -0.298768 | -1.618447 |
| 6 | 1.929594  | -1.114052 | -0.442846 |
| 8 | 1.555179  | -0.494906 | 0.767243  |
| 1 | 1.527207  | -0.825932 | -2.570253 |
| 1 | 1.943185  | 0.642089  | -1.671746 |
| 1 | 1.535412  | -2.134180 | -0.478984 |
| 1 | 3.017371  | -1.174249 | -0.480618 |
| 6 | -0.956698 | -1.059513 | -1.618447 |
| 6 | -1.929594 | -1.114052 | -0.442846 |
| 8 | -1.206191 | -1.099372 | 0.767243  |
| 1 | -1.478882 | -0.909634 | -2.570253 |
| 1 | -0.415527 | -2.003892 | -1.671746 |
| 1 | -2.615960 | -0.262616 | -0.478984 |
| 1 | -2.525615 | -2.025995 | -0.480618 |
| 6 | 0.000000  | 0.000000  | 2.978059  |
| 1 | 0.082482  | -1.016160 | 3.363394  |
| 1 | -0.921261 | 0.436648  | 3.363394  |
| 1 | 0.838779  | 0.579512  | 3.363394  |

**1-hydrosilatrane (1b)**, MP2/aug-cc-pVTZ  
E(MP2)= -805.1589121 au

|    |           |           |           |
|----|-----------|-----------|-----------|
| 14 | 0.000000  | 0.000000  | 1.308244  |
| 7  | 0.000000  | 0.000000  | -0.960083 |
| 6  | -0.477689 | 1.337108  | -1.307120 |
| 6  | 0.000000  | 2.262022  | -0.195381 |
| 8  | -0.245056 | 1.646143  | 1.045829  |
| 1  | -0.131245 | 1.653934  | -2.296511 |
| 1  | -1.567488 | 1.316397  | -1.308445 |
| 1  | 1.068369  | 2.475512  | -0.304903 |
| 1  | -0.535331 | 3.211304  | -0.233200 |
| 6  | 1.396814  | -0.254863 | -1.307120 |
| 6  | 1.958969  | -1.131011 | -0.195381 |
| 8  | 1.548130  | -0.610847 | 1.045829  |
| 1  | 1.497971  | -0.713306 | -2.296511 |
| 1  | 1.923777  | 0.699286  | -1.308445 |
| 1  | 1.609672  | -2.162991 | -0.304903 |
| 1  | 3.048736  | -1.142042 | -0.233200 |
| 6  | -0.919125 | -1.082245 | -1.307120 |
| 6  | -1.958969 | -1.131011 | -0.195381 |
| 8  | -1.303074 | -1.035296 | 1.045829  |
| 1  | -1.366726 | -0.940628 | -2.296511 |
| 1  | -0.356289 | -2.015683 | -1.308445 |
| 1  | -2.678041 | -0.312521 | -0.304903 |
| 1  | -2.513406 | -2.069262 | -0.233200 |

1 0.000000 0.000000 2.779471

**1-hydrosilatrane (1b), MP2/def2-TZVPP**

E(MP2)= -805.1274424 au

14 0.000000 0.000000 1.307290  
7 0.000000 0.000000 -0.968869  
6 -0.475147 1.337828 -1.308573  
6 0.000000 2.255996 -0.190807  
8 -0.248802 1.635910 1.045389  
1 -0.129103 1.662183 -2.294612  
1 -1.563984 1.318789 -1.311475  
1 1.067649 2.468763 -0.298034  
1 -0.532395 3.205749 -0.227662  
6 1.396167 -0.257425 -1.308573  
6 1.953750 -1.127998 -0.190807  
8 1.541141 -0.602486 1.045389  
1 1.504044 -0.719285 -2.294612  
1 1.924097 0.695055 -1.311475  
1 1.604187 -2.158993 -0.298034  
1 3.042458 -1.141807 -0.227662  
6 -0.921020 -1.080403 -1.308573  
6 -1.953750 -1.127998 -0.190807  
8 -1.292339 -1.033424 1.045389  
1 -1.374941 -0.942898 -2.294612  
1 -0.360113 -2.013844 -1.311475  
1 -2.671836 -0.309770 -0.298034  
1 -2.510063 -2.063942 -0.227662  
1 0.000000 0.000000 2.774878

**1-hydrosilatrane (1b), SCS-MP2/6-311G(d,p)**

E(SCS-MP2)= -804.69634 au

14 0.000000 0.000000 1.355150  
7 0.000000 0.000000 -1.023879  
6 -0.443051 1.360170 -1.341653  
6 0.000000 2.247884 -0.172913  
8 -0.337290 1.613933 1.042491  
1 -0.050835 1.715147 -2.306693  
1 -1.536583 1.361149 -1.387610  
1 1.084185 2.425641 -0.219939  
1 -0.505394 3.218479 -0.213344  
6 1.399468 -0.296392 -1.341653  
6 1.946725 -1.123942 -0.172913  
8 1.566351 -0.514865 1.042491  
1 1.510779 -0.813549 -2.306693  
1 1.947081 0.650145 -1.387610  
1 1.558575 -2.151752 -0.219939  
1 3.039981 -1.171556 -0.213344  
6 -0.956417 -1.063779 -1.341653  
6 -1.946725 -1.123942 -0.172913

|   |           |           |           |
|---|-----------|-----------|-----------|
| 8 | -1.229062 | -1.099068 | 1.042491  |
| 1 | -1.459943 | -0.901598 | -2.306693 |
| 1 | -0.410498 | -2.011294 | -1.387610 |
| 1 | -2.642759 | -0.273889 | -0.219939 |
| 1 | -2.534588 | -2.046923 | -0.213344 |
| 1 | 0.000000  | 0.000000  | 2.820216  |

**1-hydrosilatrane (1b), SCS-MP2/aug-cc-pVTZ**  
E(SCS-MP2)= -805.1332429 au

|    |           |           |           |
|----|-----------|-----------|-----------|
| 14 | 0.000000  | 0.000000  | 1.324179  |
| 7  | 0.000000  | 0.000000  | -0.981080 |
| 6  | -0.465762 | 1.346804  | -1.319610 |
| 6  | 0.000000  | 2.262424  | -0.189321 |
| 8  | -0.262674 | 1.637300  | 1.047068  |
| 1  | -0.102571 | 1.676365  | -2.299471 |
| 1  | -1.555807 | 1.333610  | -1.340543 |
| 1  | 1.070597  | 2.474414  | -0.281240 |
| 1  | -0.533823 | 3.213324  | -0.223603 |
| 6  | 1.399247  | -0.270041 | -1.319610 |
| 6  | 1.959317  | -1.131212 | -0.189321 |
| 8  | 1.549280  | -0.591168 | 1.047068  |
| 1  | 1.503060  | -0.749354 | -2.299471 |
| 1  | 1.932844  | 0.680563  | -1.340543 |
| 1  | 1.607607  | -2.164371 | -0.281240 |
| 1  | 3.049732  | -1.144358 | -0.223603 |
| 6  | -0.933486 | -1.076763 | -1.319610 |
| 6  | -1.959317 | -1.131212 | -0.189321 |
| 8  | -1.286606 | -1.046132 | 1.047068  |
| 1  | -1.400489 | -0.927012 | -2.299471 |
| 1  | -0.377037 | -2.014173 | -1.340543 |
| 1  | -2.678204 | -0.310043 | -0.281240 |
| 1  | -2.515909 | -2.068966 | -0.223603 |
| 1  | 0.000000  | 0.000000  | 2.794769  |

**1-hydrosilatrane (1b), SCS-MP2/def2-TZVPP**  
E(SCS-MP2)= -805.1006716 au

|    |           |           |           |
|----|-----------|-----------|-----------|
| 14 | 0.000000  | 0.000000  | 1.324047  |
| 7  | 0.000000  | 0.000000  | -0.990838 |
| 6  | -0.463056 | 1.347668  | -1.321329 |
| 6  | 0.000000  | 2.256167  | -0.184610 |
| 8  | -0.267025 | 1.627027  | 1.046449  |
| 1  | -0.099699 | 1.685094  | -2.297311 |
| 1  | -1.552090 | 1.336280  | -1.343844 |
| 1  | 1.069954  | 2.467026  | -0.273893 |
| 1  | -0.530575 | 3.207687  | -0.218091 |
| 6  | 1.398643  | -0.272816 | -1.321329 |
| 6  | 1.953898  | -1.128084 | -0.184610 |
| 8  | 1.542560  | -0.582263 | 1.046449  |
| 1  | 1.509184  | -0.756205 | -2.297311 |
| 1  | 1.933298  | 0.676010  | -1.343844 |

|   |           |           |           |
|---|-----------|-----------|-----------|
| 1 | 1.601530  | -2.160120 | -0.273893 |
| 1 | 3.043226  | -1.144352 | -0.218091 |
| 6 | -0.935587 | -1.074853 | -1.321329 |
| 6 | -1.953898 | -1.128084 | -0.184610 |
| 8 | -1.275534 | -1.044764 | 1.046449  |
| 1 | -1.409484 | -0.928889 | -2.297311 |
| 1 | -0.381207 | -2.012290 | -1.343844 |
| 1 | -2.671484 | -0.306906 | -0.273893 |

**1-fluorosilatrane (1c)**, MP2/aug-cc-pVTZ  
E(MP2)= -904.3882443 au

|    |           |           |           |
|----|-----------|-----------|-----------|
| 14 | 0.000000  | 0.000000  | 1.043757  |
| 7  | 0.000000  | 0.000000  | -1.175756 |
| 6  | -0.471886 | 1.340368  | -1.529931 |
| 6  | 0.000000  | 2.259931  | -0.411731 |
| 8  | -0.262310 | 1.637710  | 0.822099  |
| 1  | -0.114653 | 1.651963  | -2.516182 |
| 1  | -1.561568 | 1.322600  | -1.540138 |
| 1  | 1.070083  | 2.469529  | -0.509218 |
| 1  | -0.531725 | 3.210732  | -0.448137 |
| 6  | 1.396736  | -0.261519 | -1.529931 |
| 6  | 1.957158  | -1.129966 | -0.411731 |
| 8  | 1.549453  | -0.591687 | 0.822099  |
| 1  | 1.487968  | -0.726690 | -2.516182 |
| 1  | 1.926189  | 0.691058  | -1.540138 |
| 1  | 1.603633  | -2.161484 | -0.509218 |
| 1  | 3.046438  | -1.144879 | -0.448137 |
| 6  | -0.924850 | -1.078849 | -1.529931 |
| 6  | -1.957158 | -1.129966 | -0.411731 |
| 8  | -1.287143 | -1.046022 | 0.822099  |
| 1  | -1.373316 | -0.925274 | -2.516182 |
| 1  | -0.364621 | -2.013657 | -1.540138 |
| 1  | -2.673717 | -0.308045 | -0.509218 |
| 1  | -2.514713 | -2.065853 | -0.448137 |
| 9  | 0.000000  | 0.000000  | 2.653139  |

**1-fluorosilatrane (1c)**, MP2/def2-TZVPP  
E(MP2)= -904.3533252 au

|    |           |           |           |
|----|-----------|-----------|-----------|
| 14 | 0.000000  | 0.000000  | 1.049959  |
| 7  | 0.000000  | 0.000000  | -1.187023 |
| 6  | -0.468182 | 1.341095  | -1.533024 |
| 6  | 0.000000  | 2.252386  | -0.407190 |
| 8  | -0.270237 | 1.626252  | 0.820486  |
| 1  | -0.109381 | 1.661936  | -2.514771 |
| 1  | -1.556908 | 1.326000  | -1.546569 |
| 1  | 1.070024  | 2.458930  | -0.499864 |
| 1  | -0.526915 | 3.204673  | -0.443164 |
| 6  | 1.395513  | -0.265090 | -1.533024 |
| 6  | 1.950623  | -1.126193 | -0.407190 |
| 8  | 1.543494  | -0.579094 | 0.820486  |

|   |           |           |           |
|---|-----------|-----------|-----------|
| 1 | 1.493969  | -0.736241 | -2.514771 |
| 1 | 1.926804  | 0.685322  | -1.546569 |
| 1 | 1.594484  | -2.156133 | -0.499864 |
| 1 | 3.038786  | -1.146014 | -0.443164 |
| 6 | -0.927331 | -1.076005 | -1.533024 |
| 6 | -1.950623 | -1.126193 | -0.407190 |
| 8 | -1.273257 | -1.047158 | 0.820486  |
| 1 | -1.384588 | -0.925694 | -2.514771 |
| 1 | -0.369896 | -2.011322 | -1.546569 |
| 1 | -2.664508 | -0.302797 | -0.499864 |
| 1 | -2.511871 | -2.058659 | -0.443164 |
| 9 | 0.000000  | 0.000000  | 2.650558  |

**1-fluorosilatrane (1c), SCS-MP2/6-311G(d,p)**  
E(SCS-MP2)= -903.8413953 au

|    |           |           |           |
|----|-----------|-----------|-----------|
| 14 | 0.000000  | 0.000000  | 1.075415  |
| 7  | 0.000000  | 0.000000  | -1.228051 |
| 6  | -0.437576 | 1.362401  | -1.562251 |
| 6  | 0.000000  | 2.249910  | -0.392056 |
| 8  | -0.353810 | 1.609324  | 0.814580  |
| 1  | -0.034860 | 1.703653  | -2.526575 |
| 1  | -1.530567 | 1.366386  | -1.615383 |
| 1  | 1.084768  | 2.424483  | -0.427402 |
| 1  | -0.503971 | 3.220531  | -0.432420 |
| 6  | 1.398662  | -0.302249 | -1.562251 |
| 6  | 1.948479  | -1.124955 | -0.392056 |
| 8  | 1.570620  | -0.498254 | 0.814580  |
| 1  | 1.492837  | -0.821637 | -2.526575 |
| 1  | 1.948609  | 0.642317  | -1.615383 |
| 1  | 1.557280  | -2.151678 | -0.427402 |
| 1  | 3.041047  | -1.173814 | -0.432420 |
| 6  | -0.961086 | -1.060152 | -1.562251 |
| 6  | -1.948479 | -1.124955 | -0.392056 |
| 8  | -1.216811 | -1.111070 | 0.814580  |
| 1  | -1.457977 | -0.882016 | -2.526575 |
| 1  | -0.418041 | -2.008703 | -1.615383 |
| 1  | -2.642048 | -0.272805 | -0.427402 |
| 1  | -2.537076 | -2.046717 | -0.432420 |
| 9  | 0.000000  | 0.000000  | 2.685944  |

**1-fluorosilatrane (1c), SCS-MP2/aug-cc-pVTZ**  
E(SCS-MP2)= -904.3505612 au

|    |           |           |           |
|----|-----------|-----------|-----------|
| 14 | 0.000000  | 0.000000  | 1.053662  |
| 7  | 0.000000  | 0.000000  | -1.190301 |
| 6  | 0.461504  | -1.348999 | -1.540489 |
| 6  | 0.000000  | -2.263029 | -0.407461 |
| 8  | 0.273831  | -1.631699 | 0.822586  |
| 1  | 0.088909  | -1.668958 | -2.518928 |
| 1  | 1.551270  | -1.337917 | -1.568122 |
| 1  | -1.071269 | -2.473859 | -0.491392 |

|   |           |           |           |
|---|-----------|-----------|-----------|
| 1 | 0.533395  | -3.213661 | -0.440145 |
| 6 | -1.399019 | 0.274825  | -1.540489 |
| 6 | -1.959840 | 1.131514  | -0.407461 |
| 8 | -1.550008 | 0.578705  | 0.822586  |
| 1 | -1.489815 | 0.757482  | -2.518928 |
| 1 | -1.934305 | -0.674480 | -1.568122 |
| 1 | -1.606790 | 2.164675  | -0.491392 |
| 1 | -3.049810 | 1.144897  | -0.440145 |
| 6 | 0.937516  | 1.074174  | -1.540489 |
| 6 | 1.959840  | 1.131514  | -0.407461 |
| 8 | 1.276177  | 1.052994  | 0.822586  |
| 1 | 1.400906  | 0.911477  | -2.518928 |
| 1 | 0.383035  | 2.012397  | -1.568122 |
| 1 | 2.678059  | 0.309183  | -0.491392 |
| 1 | 2.516415  | 2.068764  | -0.440145 |
| 9 | 0.000000  | 0.000000  | 2.661957  |

**1-fluorosilatrane (1c), SCS-MP2/def2-TZVPP**  
E(SCS-MP2)= -904.3145539 au

|    |           |           |           |
|----|-----------|-----------|-----------|
| 14 | 0.000000  | 0.000000  | 1.058478  |
| 7  | 0.000000  | 0.000000  | -1.199961 |
| 6  | -0.459822 | 1.349174  | -1.542314 |
| 6  | 0.000000  | 2.256513  | -0.403800 |
| 8  | -0.275597 | 1.621997  | 0.821508  |
| 1  | -0.088432 | 1.677019  | -2.517503 |
| 1  | -1.548598 | 1.339608  | -1.570306 |
| 1  | 1.070270  | 2.467236  | -0.486937 |
| 1  | -0.530893 | 3.207380  | -0.435255 |
| 6  | 1.398330  | -0.276370 | -1.542314 |
| 6  | 1.954197  | -1.128256 | -0.403800 |
| 8  | 1.542489  | -0.572324 | 0.821508  |
| 1  | 1.496557  | -0.761925 | -2.517503 |
| 1  | 1.934433  | 0.671322  | -1.570306 |
| 1  | 1.601554  | -2.160498 | -0.486937 |
| 1  | 3.043119  | -1.143923 | -0.435255 |
| 6  | -0.938508 | -1.072805 | -1.542314 |
| 6  | -1.954197 | -1.128256 | -0.403800 |
| 8  | -1.266892 | -1.049673 | 0.821508  |
| 1  | -1.408125 | -0.915094 | -2.517503 |
| 1  | -0.385835 | -2.010929 | -1.570306 |
| 1  | -2.671824 | -0.306737 | -0.486937 |
